# Supplementary material for: Efficient one-pot per-O-acetylation–thioglycosidation of native sugars, 4,6-O-arylidenation and one-pot 4,6-O-benzylidenation–acetylation of S-/O-glycosides catalyzed by Mg(OTf)2
Source: Royal Society of Chemistry journal article supplement (doi:10.1039/c6ra23198e), 2016-01-01

# Electronic Supplementary Information

## Efficient one-pot per-*O*-acetylation–thioglycosidation of native sugars, 4,6-*O*-arylidene and one-pot 4,6-*O*-benzylidene–acetylation of *S*-/*O*-glycosides catalyzed by Mg(OTf)<sub>2</sub>

Mana Mohan Mukherjee, Nabamita Basu,<sup>†</sup> Aritra Chaudhury and Rina Ghosh\*

Department of Chemistry, Jadavpur University, Jadavpur, Kolkata,  
West Bengal, India, 700032.

<sup>†</sup> *At present: Department of Organic Chemistry, IACS, Jadavpur, Kolkata 700032, India.*  
e-mail: [ghoshrina@yahoo.com](mailto:ghoshrina@yahoo.com); [ghosh\\_rina@hotmail.com](mailto:ghosh_rina@hotmail.com)

### Table of Content

|                                  |      |
|----------------------------------|------|
| <sup>1</sup> H NMR of <b>1b</b>  | S-4  |
| <sup>13</sup> C NMR of <b>1b</b> | S-5  |
| <sup>1</sup> H NMR of <b>1c</b>  | S-6  |
| <sup>1</sup> H NMR of <b>1d</b>  | S-7  |
| <sup>1</sup> H NMR of <b>1e</b>  | S-8  |
| <sup>13</sup> C NMR of <b>1e</b> | S-9  |
| <sup>1</sup> H NMR of <b>2b</b>  | S-10 |
| <sup>13</sup> C NMR of <b>2b</b> | S-11 |
| <sup>1</sup> H NMR of <b>2c</b>  | S-12 |
| <sup>13</sup> C NMR of <b>2c</b> | S-13 |
| <sup>1</sup> H NMR of <b>2d</b>  | S-14 |
| <sup>13</sup> C NMR of <b>2d</b> | S-15 |
| <sup>1</sup> H NMR of <b>3b</b>  | S-16 |
| <sup>13</sup> C NMR of <b>3b</b> | S-17 |
| <sup>1</sup> H NMR of <b>3c</b>  | S-18 |
| <sup>13</sup> C NMR of <b>3c</b> | S-19 |
| <sup>1</sup> H NMR of <b>4b</b>  | S-20 |
| <sup>13</sup> C NMR of <b>4b</b> | S-21 |
| <sup>1</sup> H NMR of <b>5b</b>  | S-22 |
| <sup>13</sup> C NMR of <b>5b</b> | S-23 |
| <sup>1</sup> H NMR of <b>5c</b>  | S-24 |
| <sup>13</sup> C NMR of <b>5c</b> | S-25 |

|                                   |      |
|-----------------------------------|------|
| <sup>1</sup> H NMR of <b>6b</b>   | S-26 |
| <sup>13</sup> C NMR of <b>6b</b>  | S-27 |
| <sup>1</sup> H NMR of <b>7b</b>   | S-28 |
| <sup>1</sup> H NMR of <b>7c</b>   | S-29 |
| <sup>13</sup> C NMR of <b>7c</b>  | S-30 |
| <sup>1</sup> H NMR of <b>8b</b>   | S-31 |
| <sup>13</sup> C NMR of <b>8b</b>  | S-32 |
| <sup>1</sup> H NMR of <b>9b</b>   | S-33 |
| <sup>13</sup> C NMR of <b>9b</b>  | S-34 |
| <sup>1</sup> H NMR of <b>10b</b>  | S-35 |
| <sup>13</sup> C NMR of <b>10b</b> | S-36 |
| <sup>1</sup> H NMR of <b>10c</b>  | S-37 |
| <sup>1</sup> H NMR of <b>11b</b>  | S-38 |
| <sup>1</sup> H NMR of <b>12b</b>  | S-39 |
| <sup>13</sup> C NMR of <b>12b</b> | S-40 |
| <sup>1</sup> H NMR of <b>13b</b>  | S-41 |
| <sup>1</sup> H NMR of <b>11c</b>  | S-42 |
| <sup>13</sup> C NMR of <b>11c</b> | S-43 |
| <sup>1</sup> H NMR of <b>14b</b>  | S-44 |
| <sup>13</sup> C NMR of <b>14b</b> | S-45 |
| <sup>1</sup> H NMR of <b>15b</b>  | S-46 |
| <sup>1</sup> H NMR of <b>16b</b>  | S-47 |
| <sup>13</sup> C NMR of <b>16b</b> | S-48 |
| <sup>1</sup> H NMR of <b>17b</b>  | S-49 |
| <sup>1</sup> H NMR of <b>18b</b>  | S-50 |
| <sup>1</sup> H NMR of <b>19b</b>  | S-51 |
| <sup>13</sup> C NMR of <b>19b</b> | S-52 |
| <sup>1</sup> H NMR of <b>20b</b>  | S-53 |
| <sup>1</sup> H NMR of <b>21b</b>  | S-54 |
| <sup>1</sup> H NMR of <b>22b</b>  | S-55 |
| <sup>1</sup> H NMR of <b>23b</b>  | S-56 |
| <sup>1</sup> H NMR of <b>24b</b>  | S-57 |
| <sup>13</sup> C NMR of <b>24b</b> | S-58 |
| <sup>1</sup> H NMR of <b>25b</b>  | S-59 |
| <sup>13</sup> C NMR of <b>25b</b> | S-60 |
| <sup>1</sup> H NMR of <b>26b</b>  | S-61 |
| <sup>13</sup> C NMR of <b>26b</b> | S-62 |

|                                   |      |
|-----------------------------------|------|
| <sup>1</sup> H NMR of <b>27b</b>  | S-63 |
| <sup>13</sup> C NMR of <b>27b</b> | S-64 |
| <sup>1</sup> H NMR of <b>28b</b>  | S-65 |
| <sup>13</sup> C NMR of <b>28b</b> | S-66 |
| <sup>1</sup> H NMR of <b>29</b>   | S-67 |
| <sup>13</sup> C NMR of <b>29</b>  | S-68 |
| <sup>1</sup> H NMR of <b>31</b>   | S-69 |
| <sup>13</sup> C NMR of <b>31</b>  | S-70 |
| <sup>1</sup> H NMR of <b>33</b>   | S-71 |
| <sup>13</sup> C NMR of <b>33</b>  | S-72 |
| <sup>1</sup> H NMR of <b>35</b>   | S-73 |
| <sup>1</sup> H NMR of <b>37</b>   | S-74 |
| <sup>1</sup> H NMR of <b>39</b>   | S-75 |
| <sup>1</sup> H NMR of <b>41</b>   | S-76 |

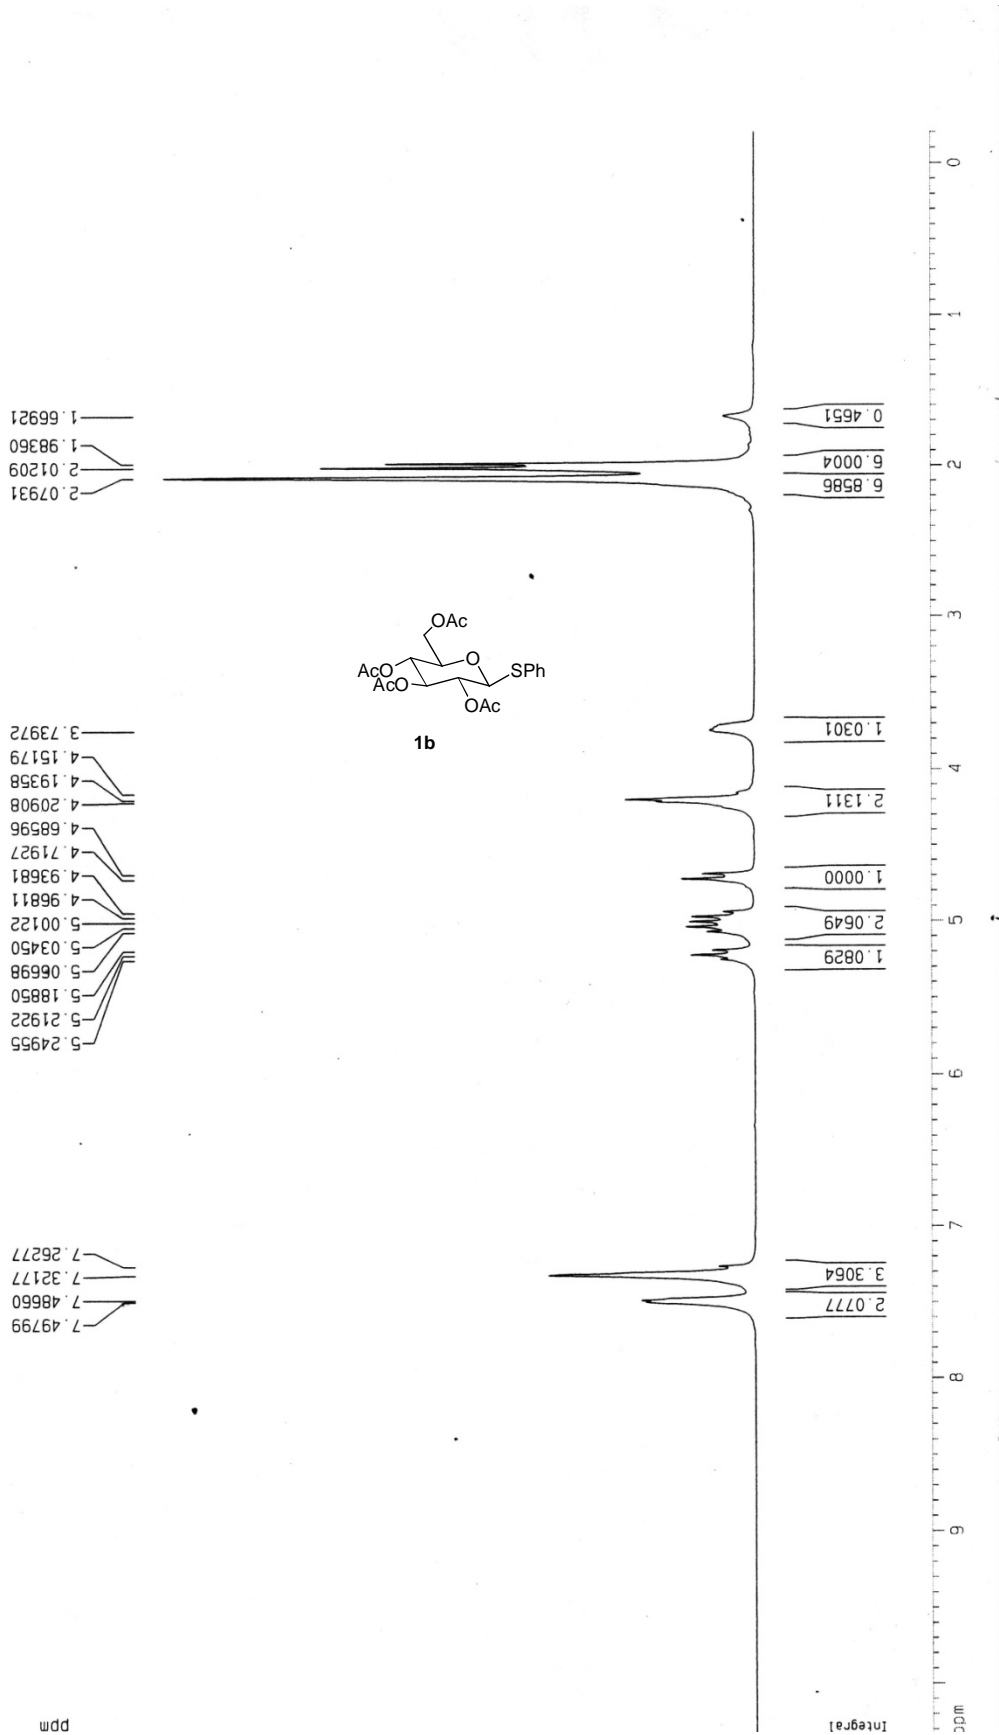

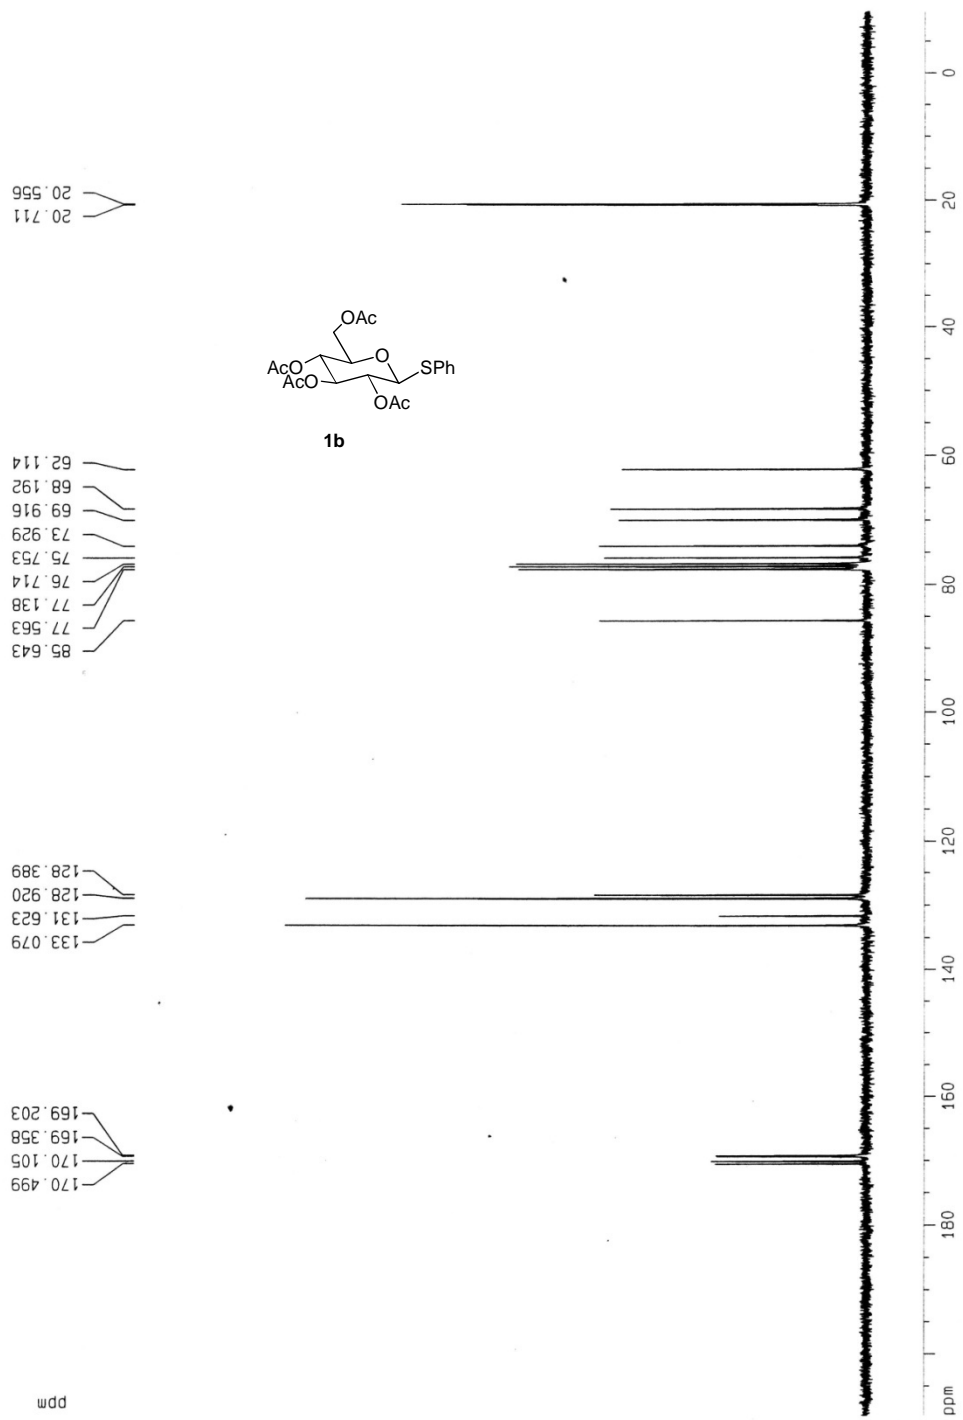

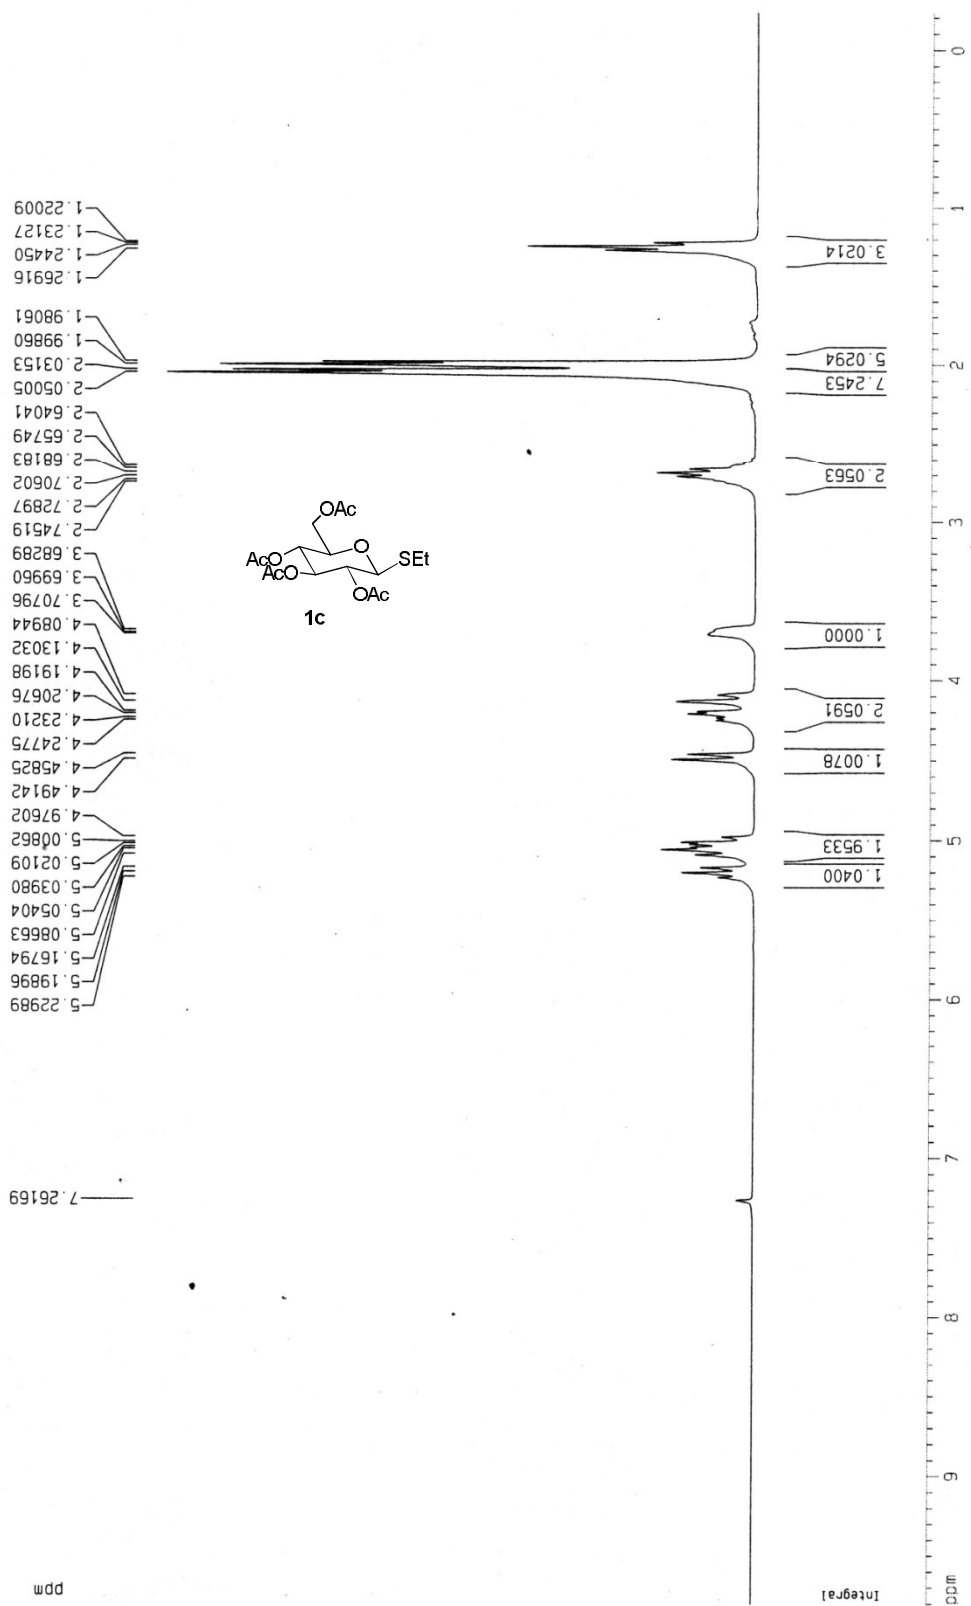

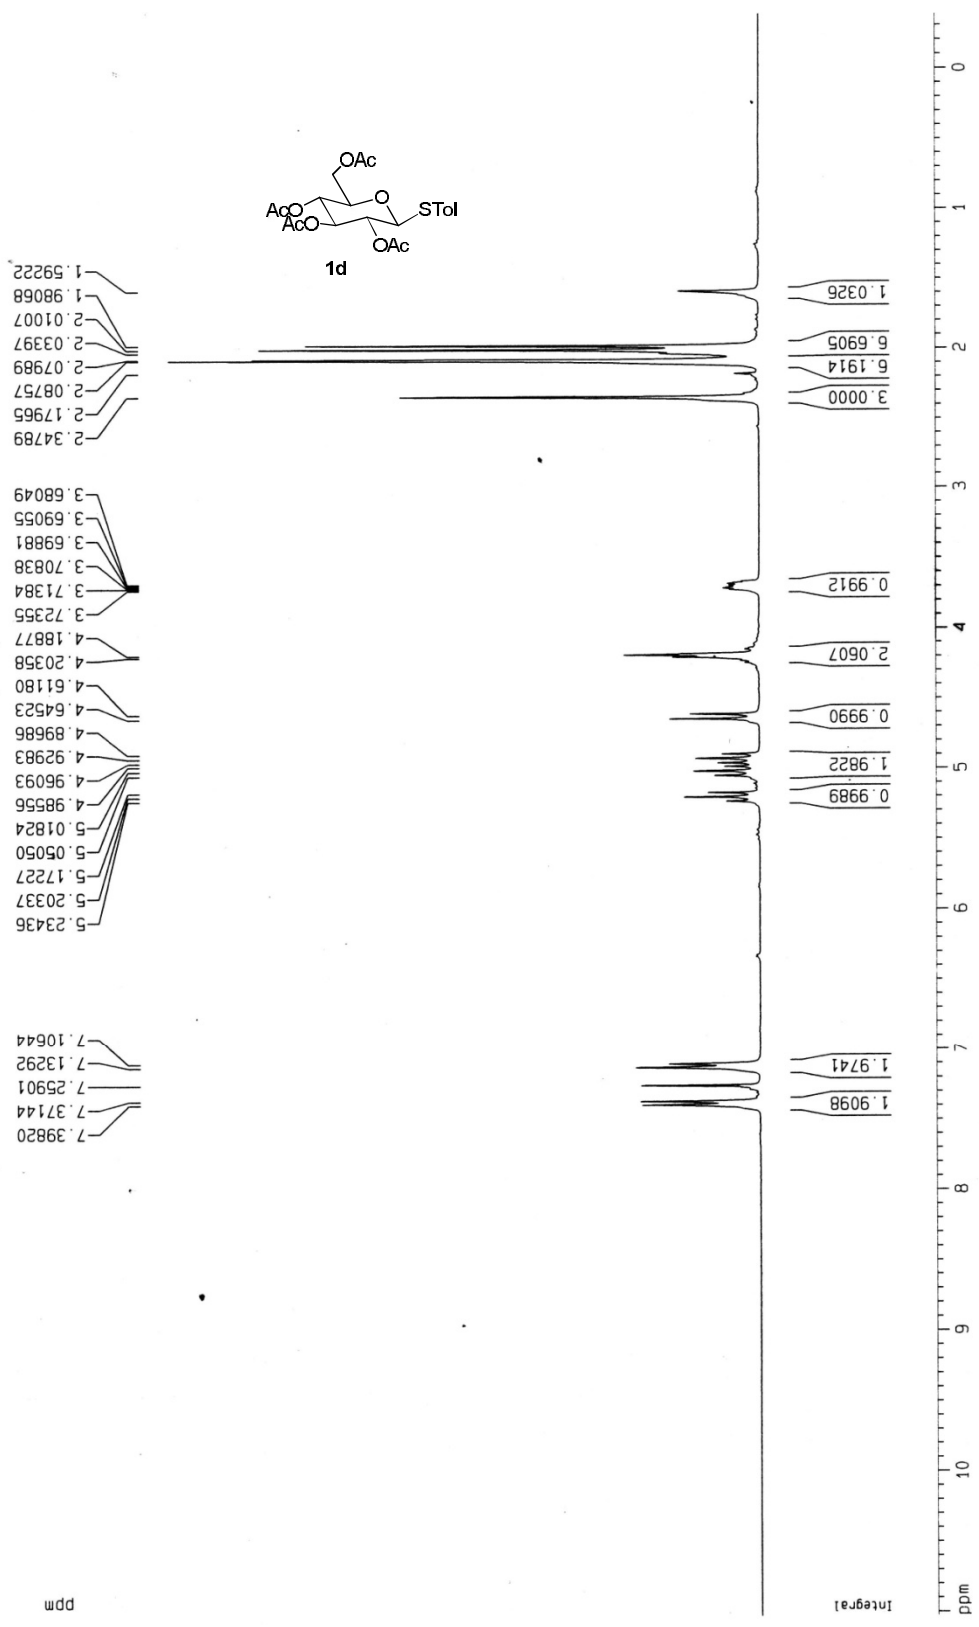

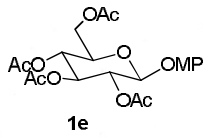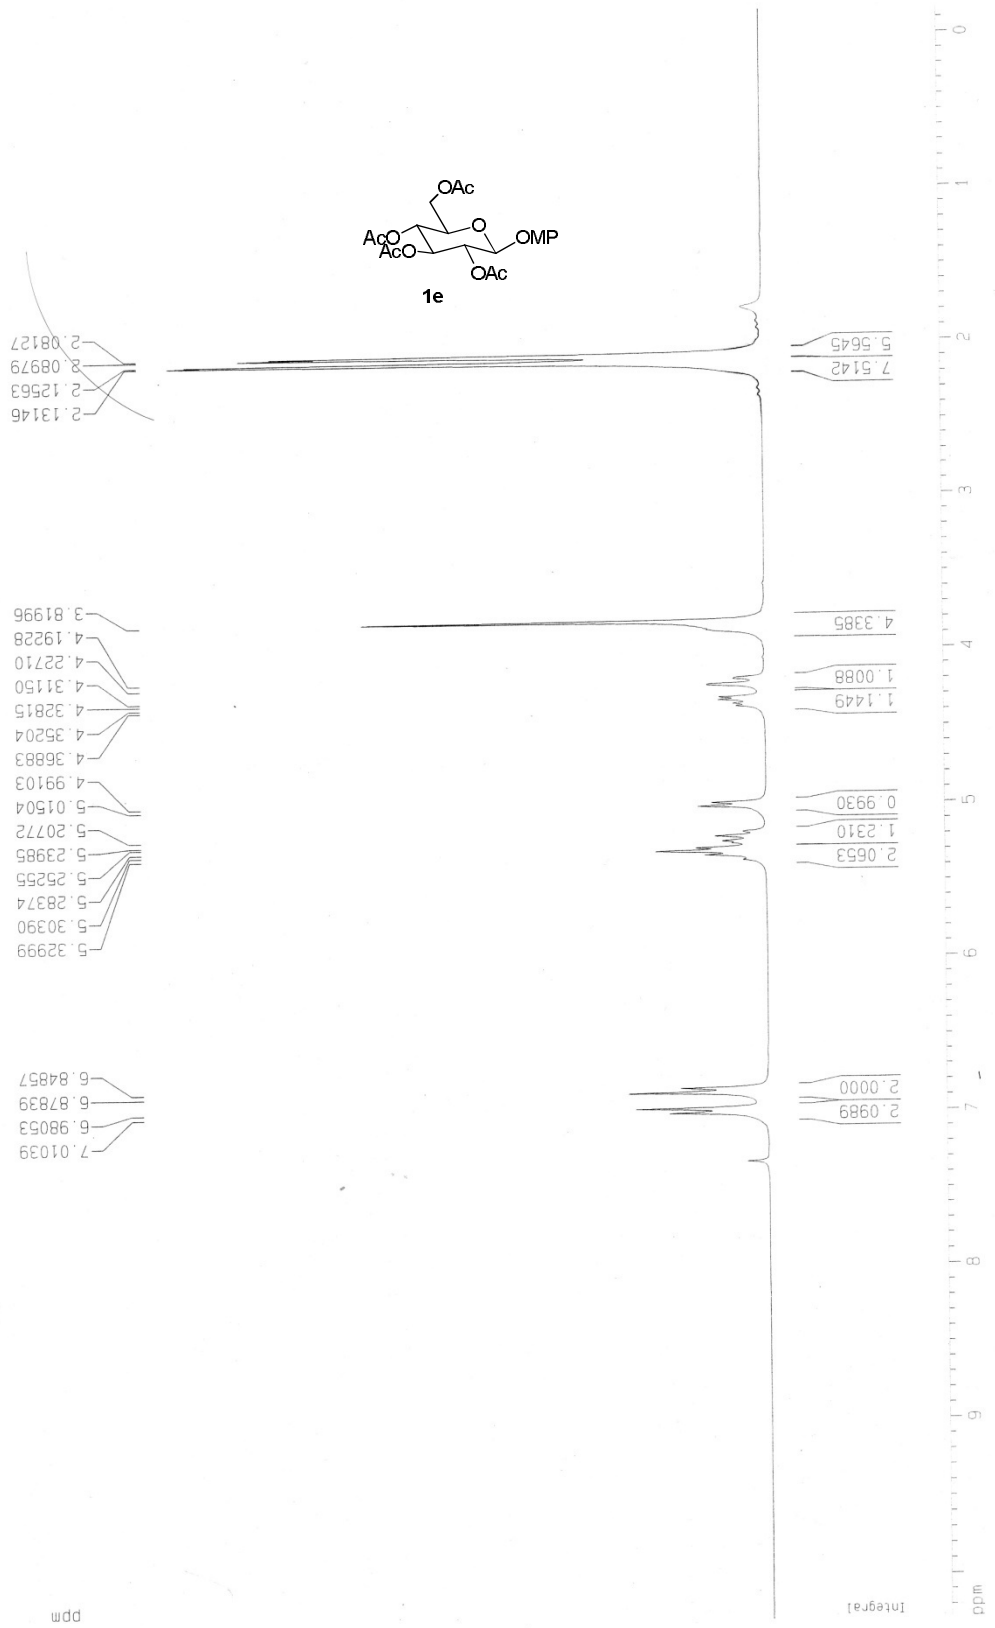



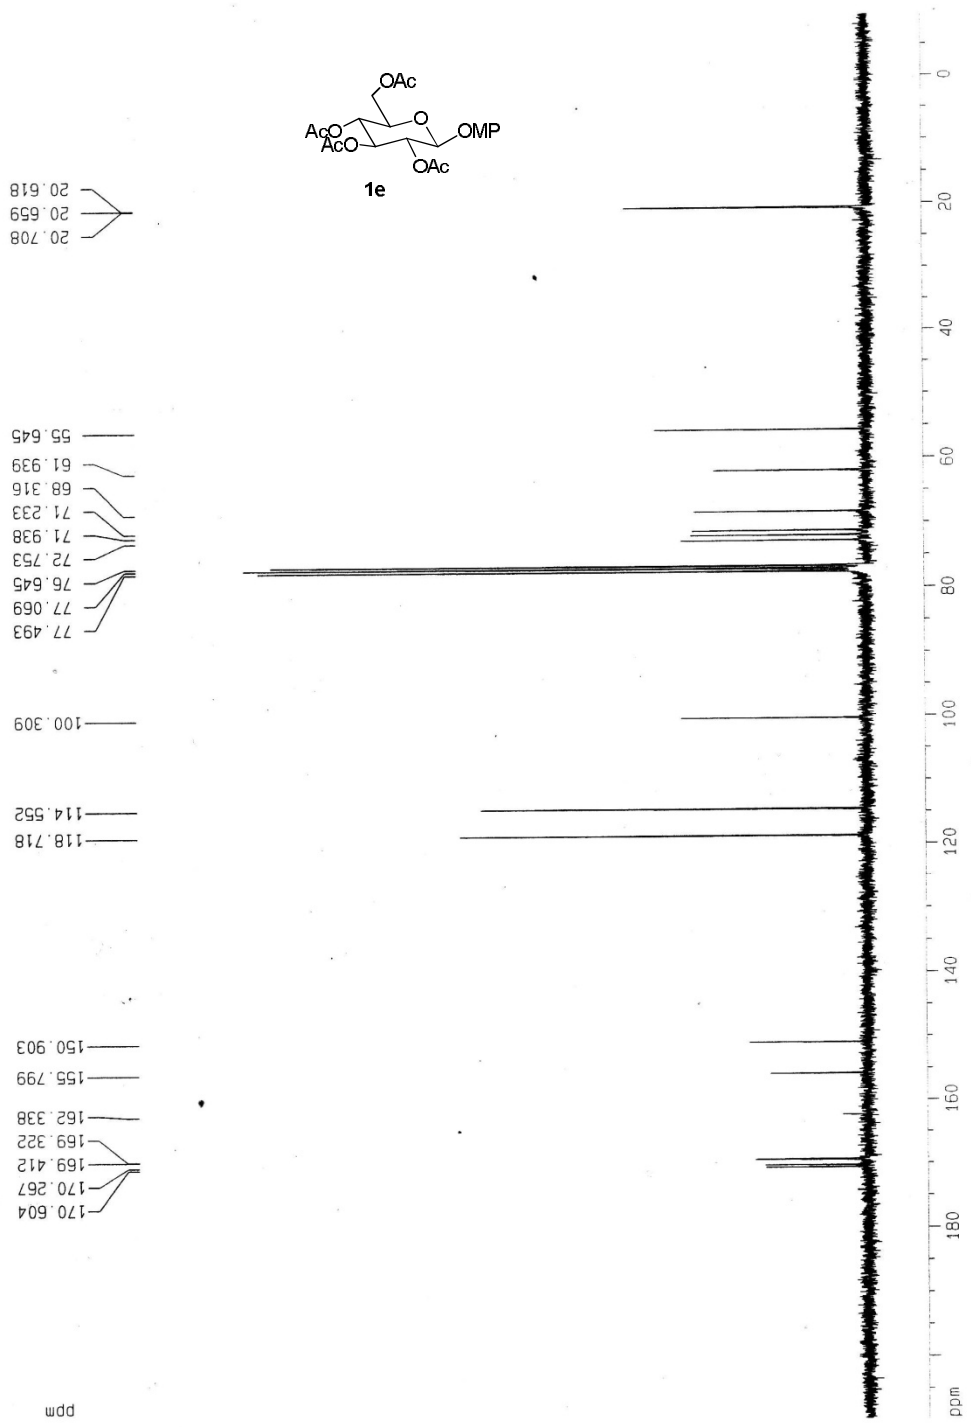

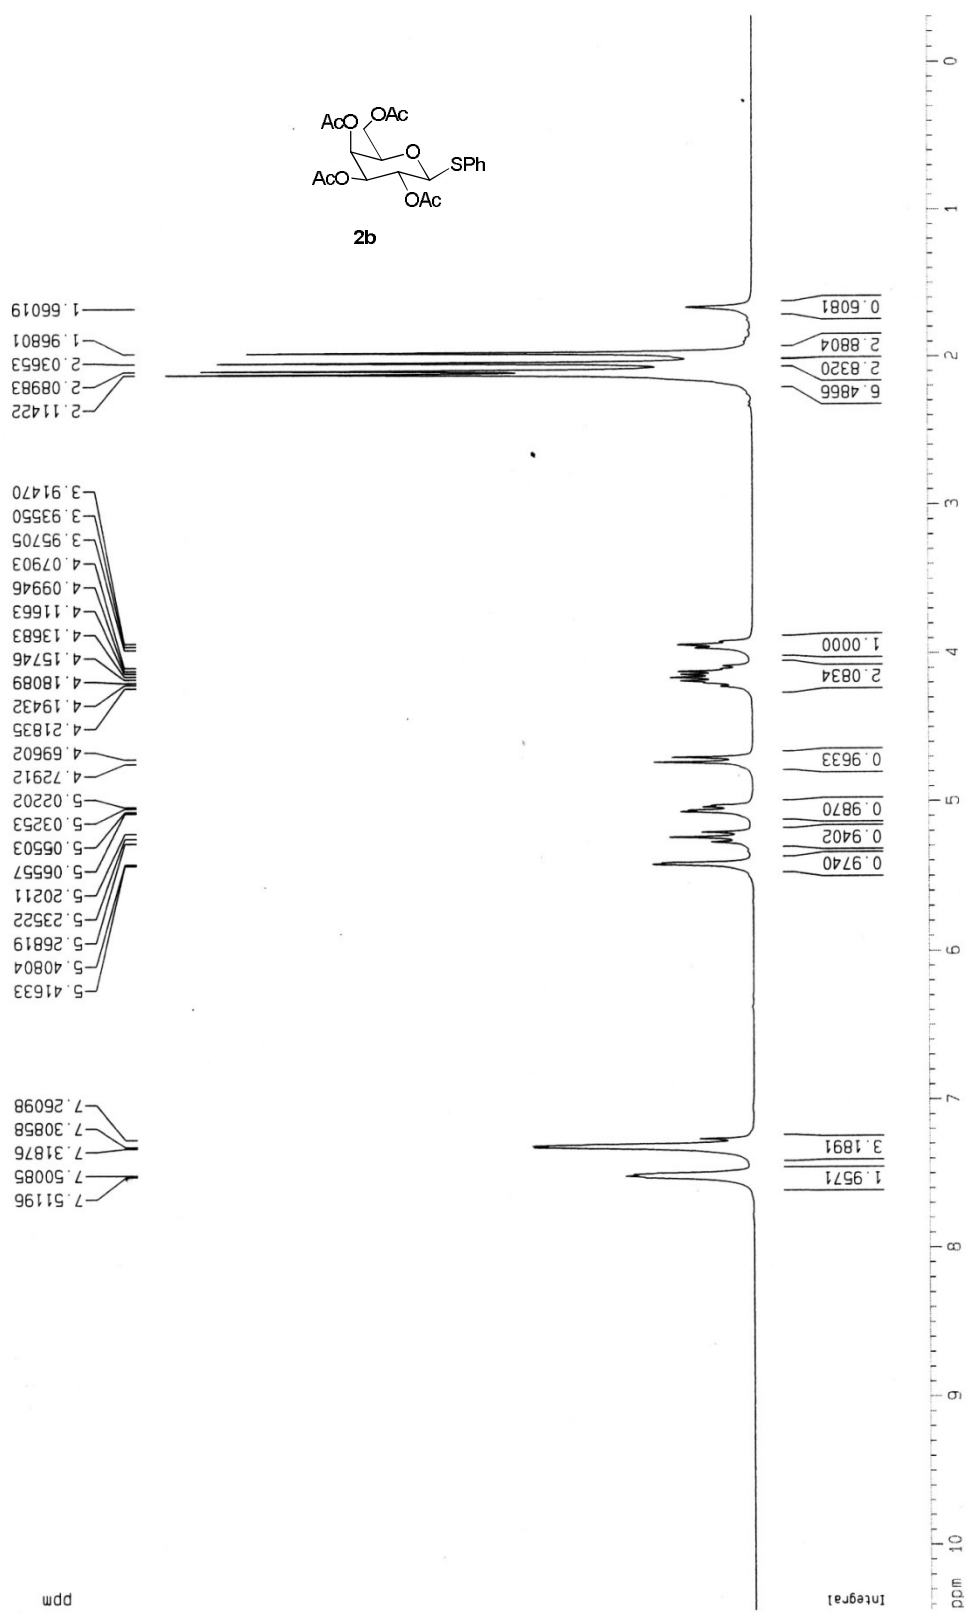

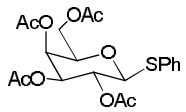

2b

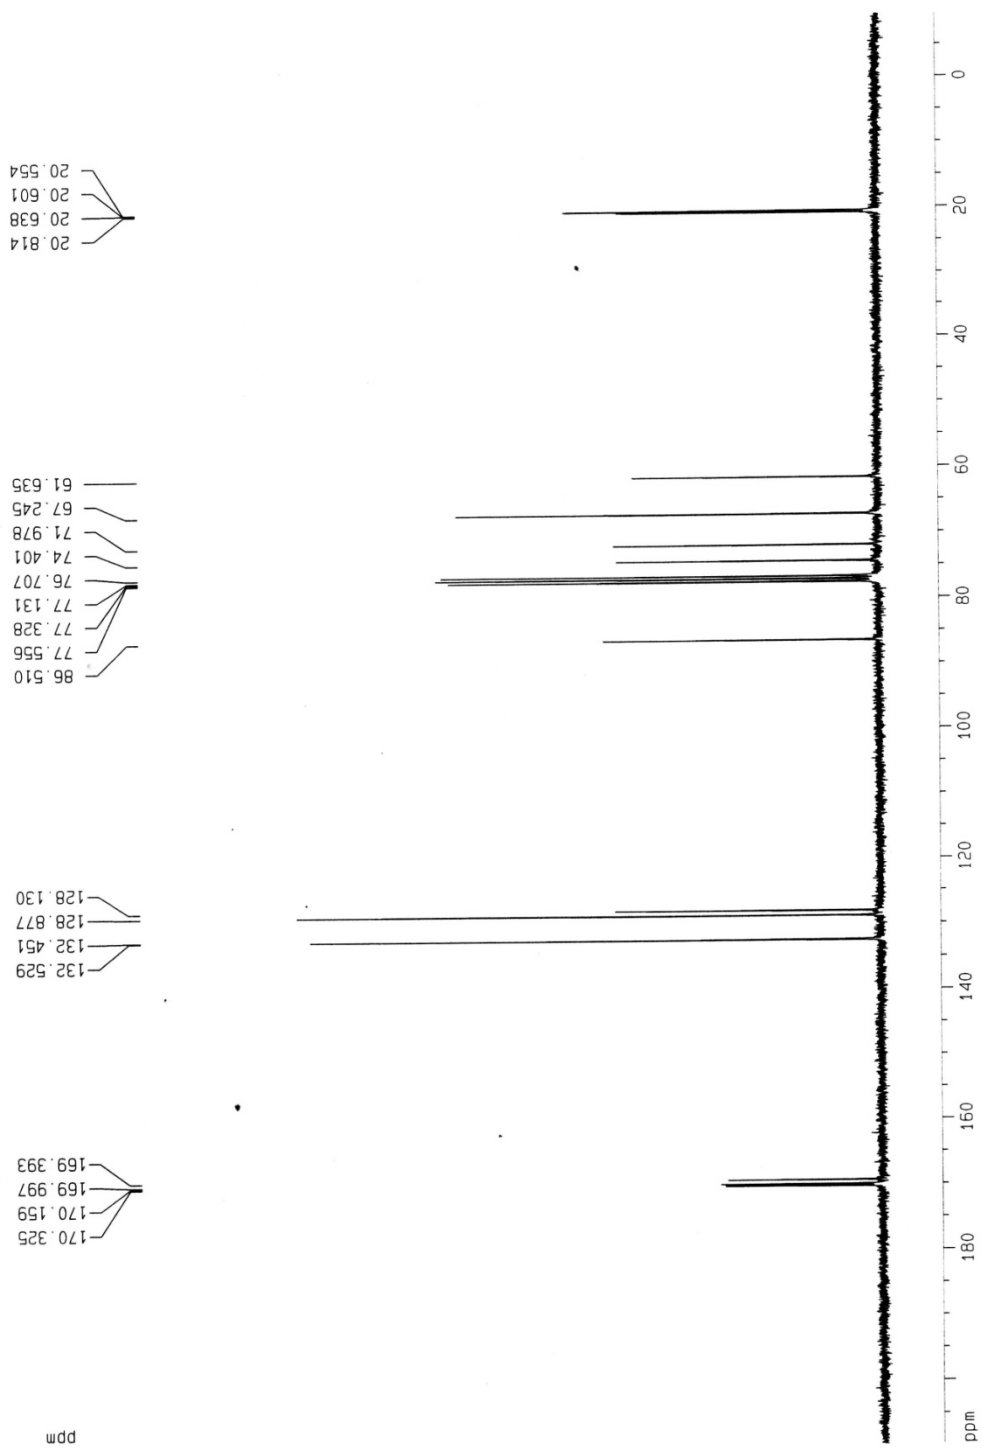

1.97470  
2.04571  
2.10224  
2.11807  
2.34798

3.89834  
3.92013  
3.94166  
4.12128  
4.14191  
4.16042  
4.18367  
4.19749  
4.64032  
4.67333  
5.02093  
5.03151  
5.05399  
5.06459  
5.18746  
5.22052  
5.25355  
5.40589  
5.41503

7.42905  
7.40237  
7.14280  
7.11668

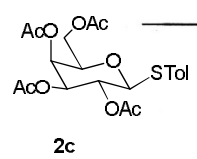

ppm

3.2466  
5.8864  
3.2063  
3.0518

1.0458  
2.1829  
1.0201  
1.0225  
1.0000  
1.0172

2.0742  
2.0668

Integral

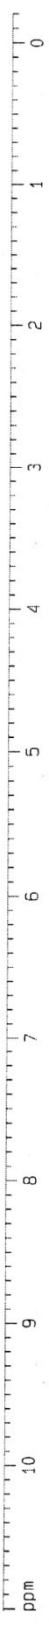

21.128  
20.826  
20.632  
20.586  
20.551

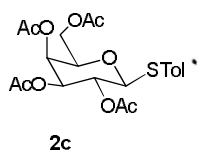

86.881  
77.520  
77.097  
76.672  
74.356  
72.027  
67.317  
67.246  
61.586

138.423  
133.142  
129.619  
128.613

170.324  
170.164  
170.014  
169.388

ppm

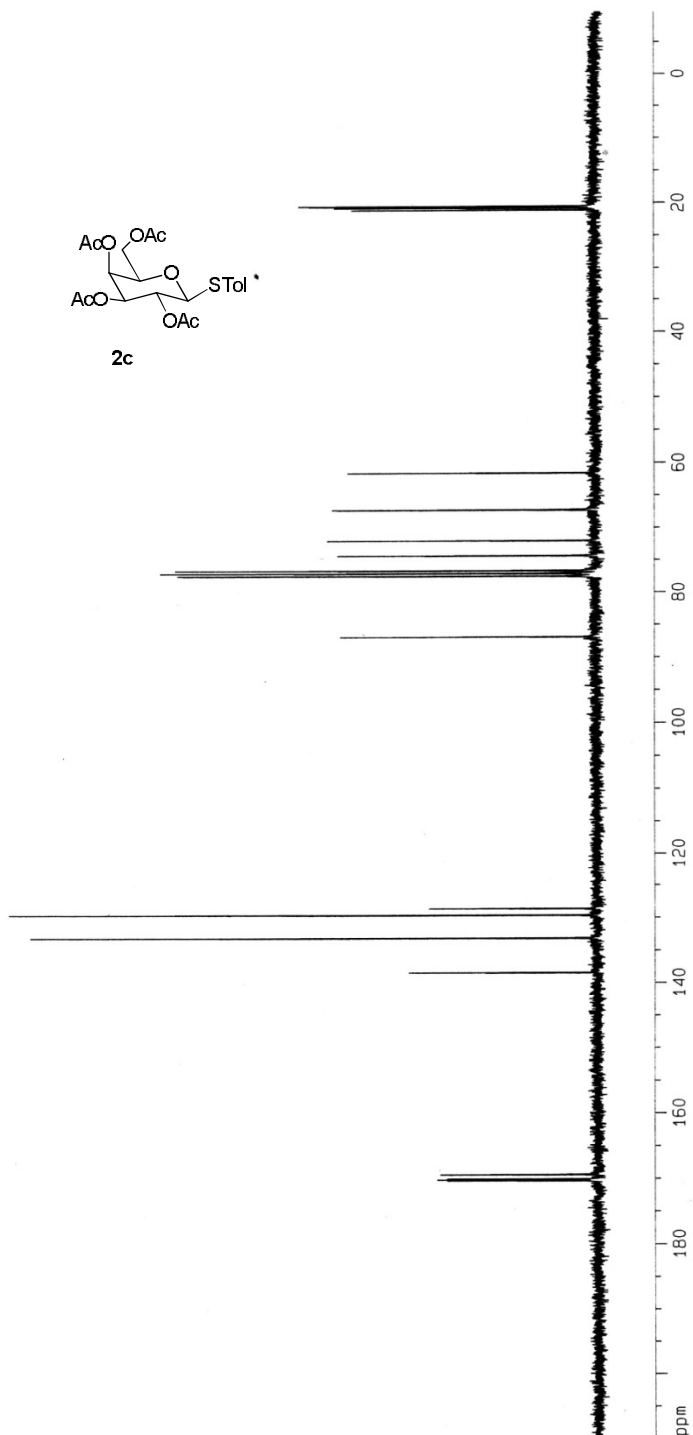

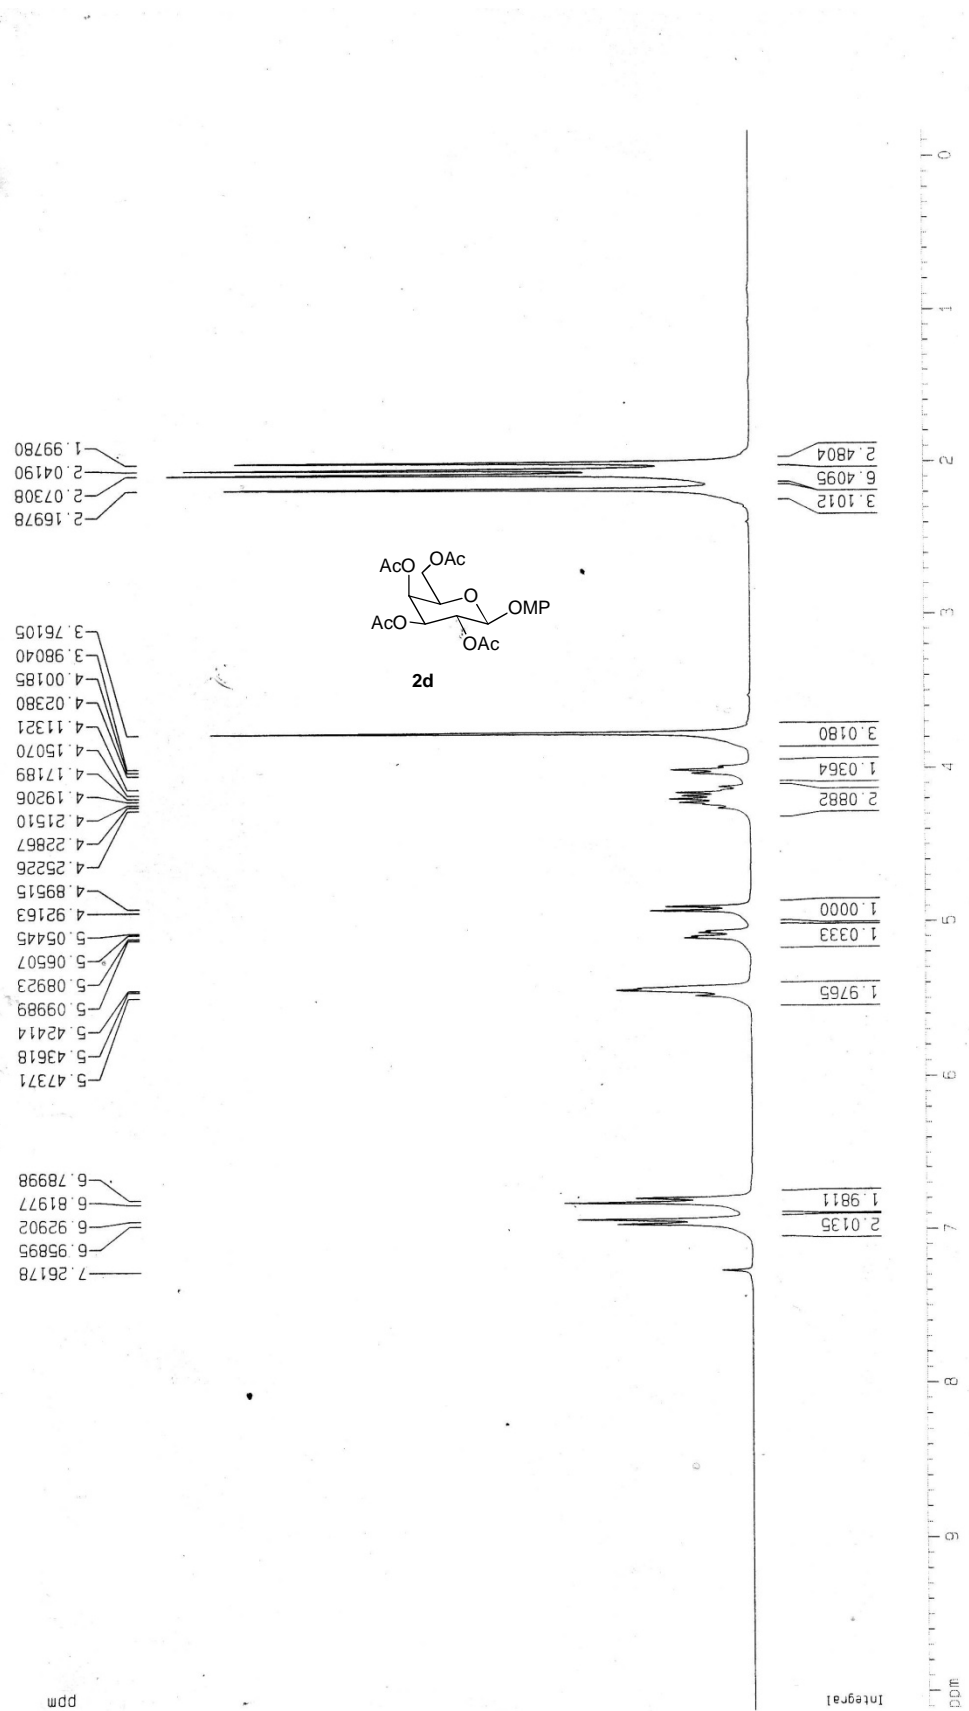

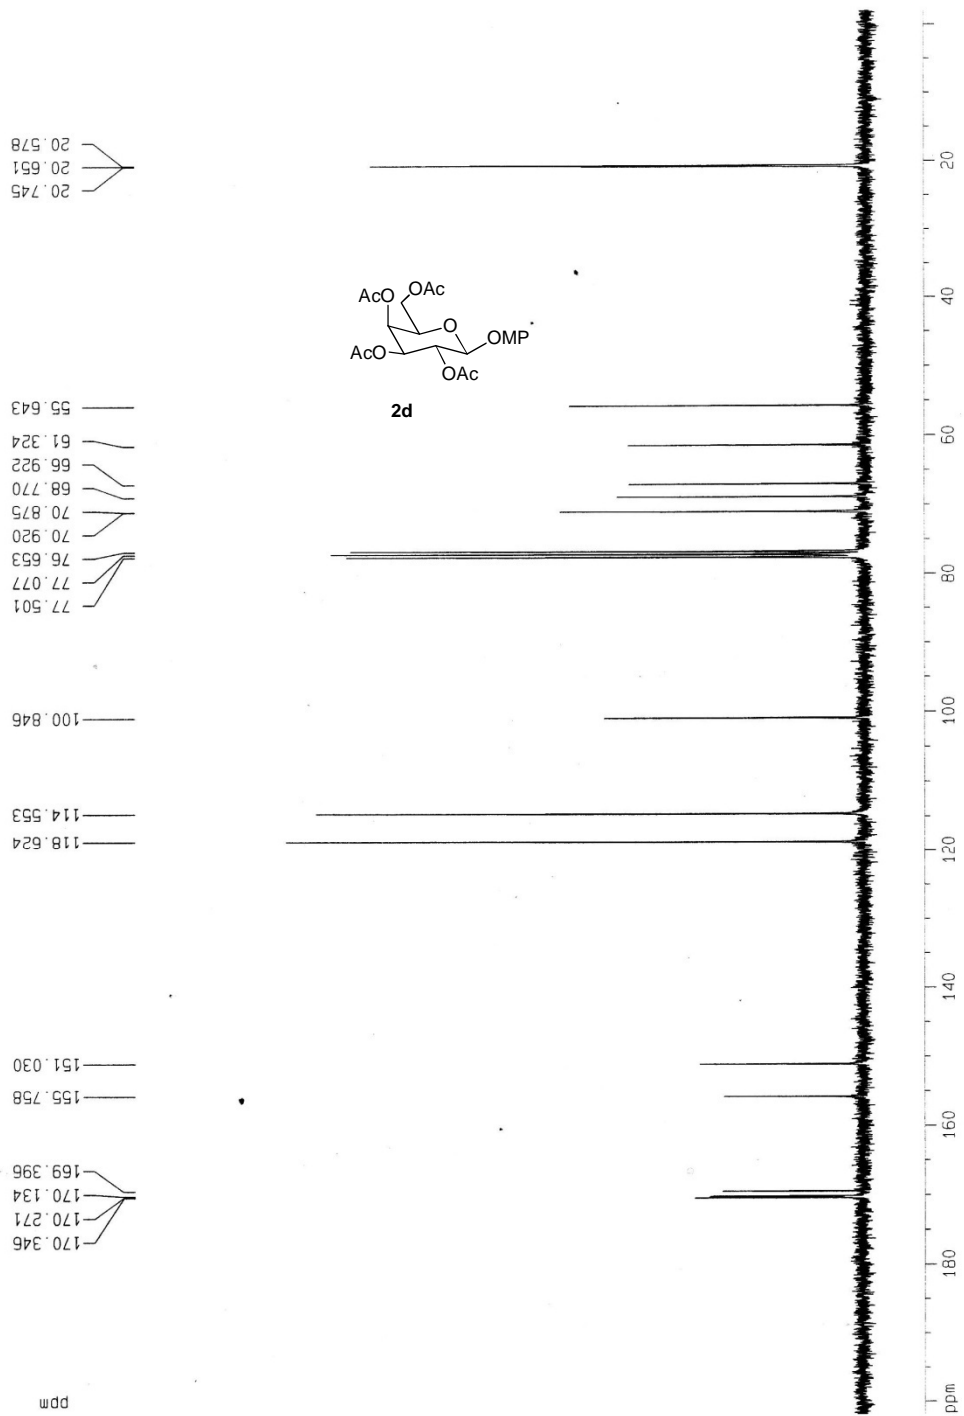

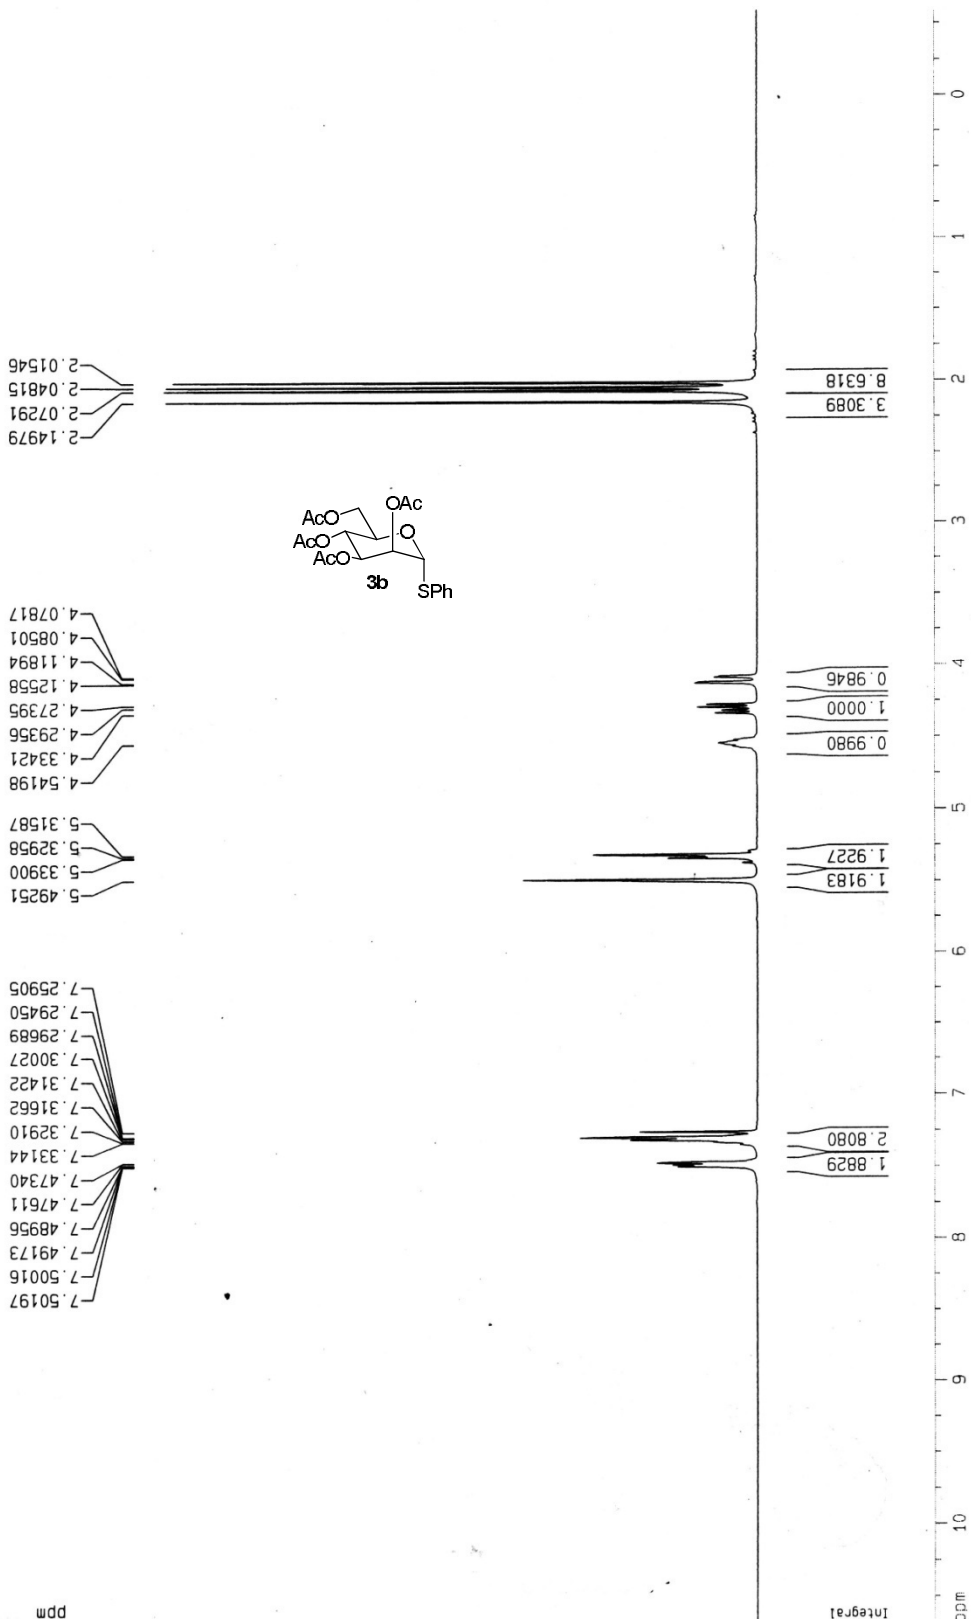



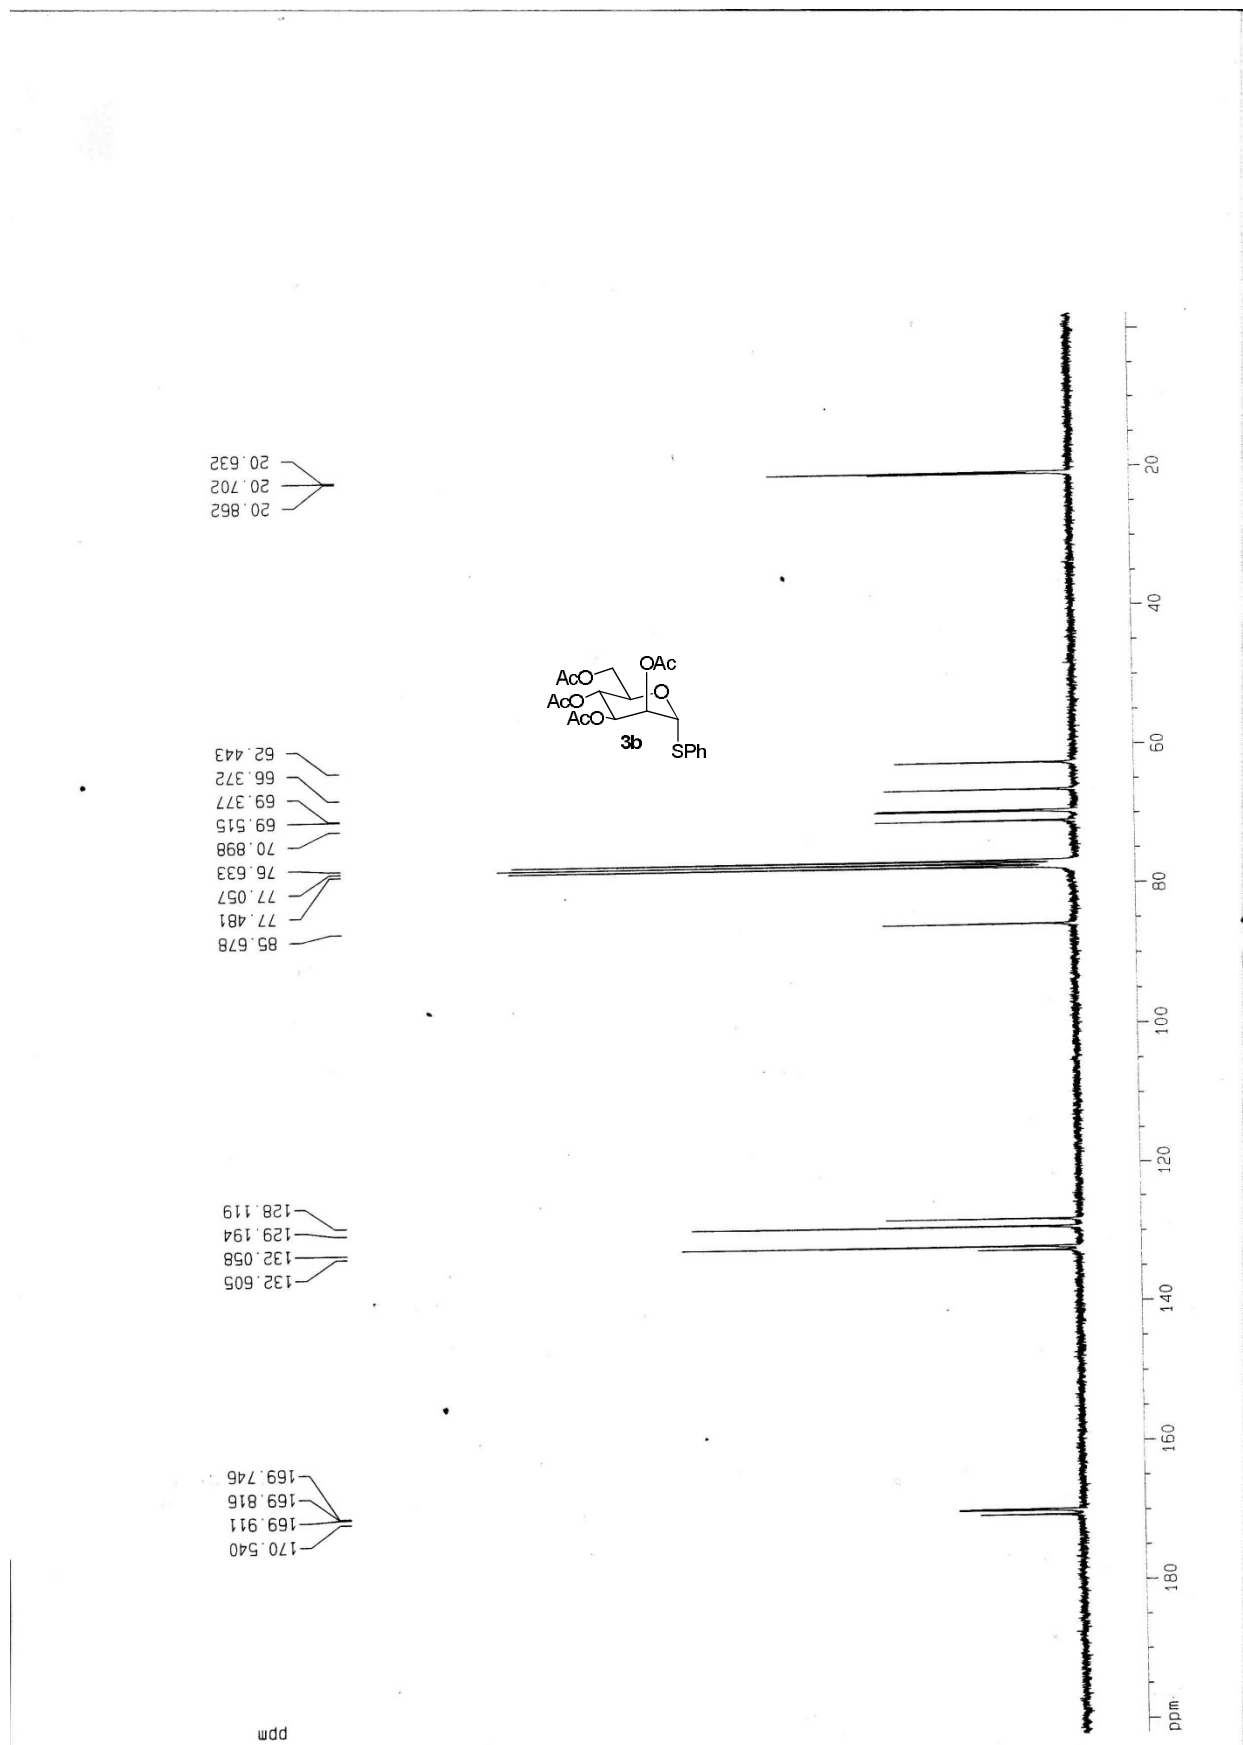

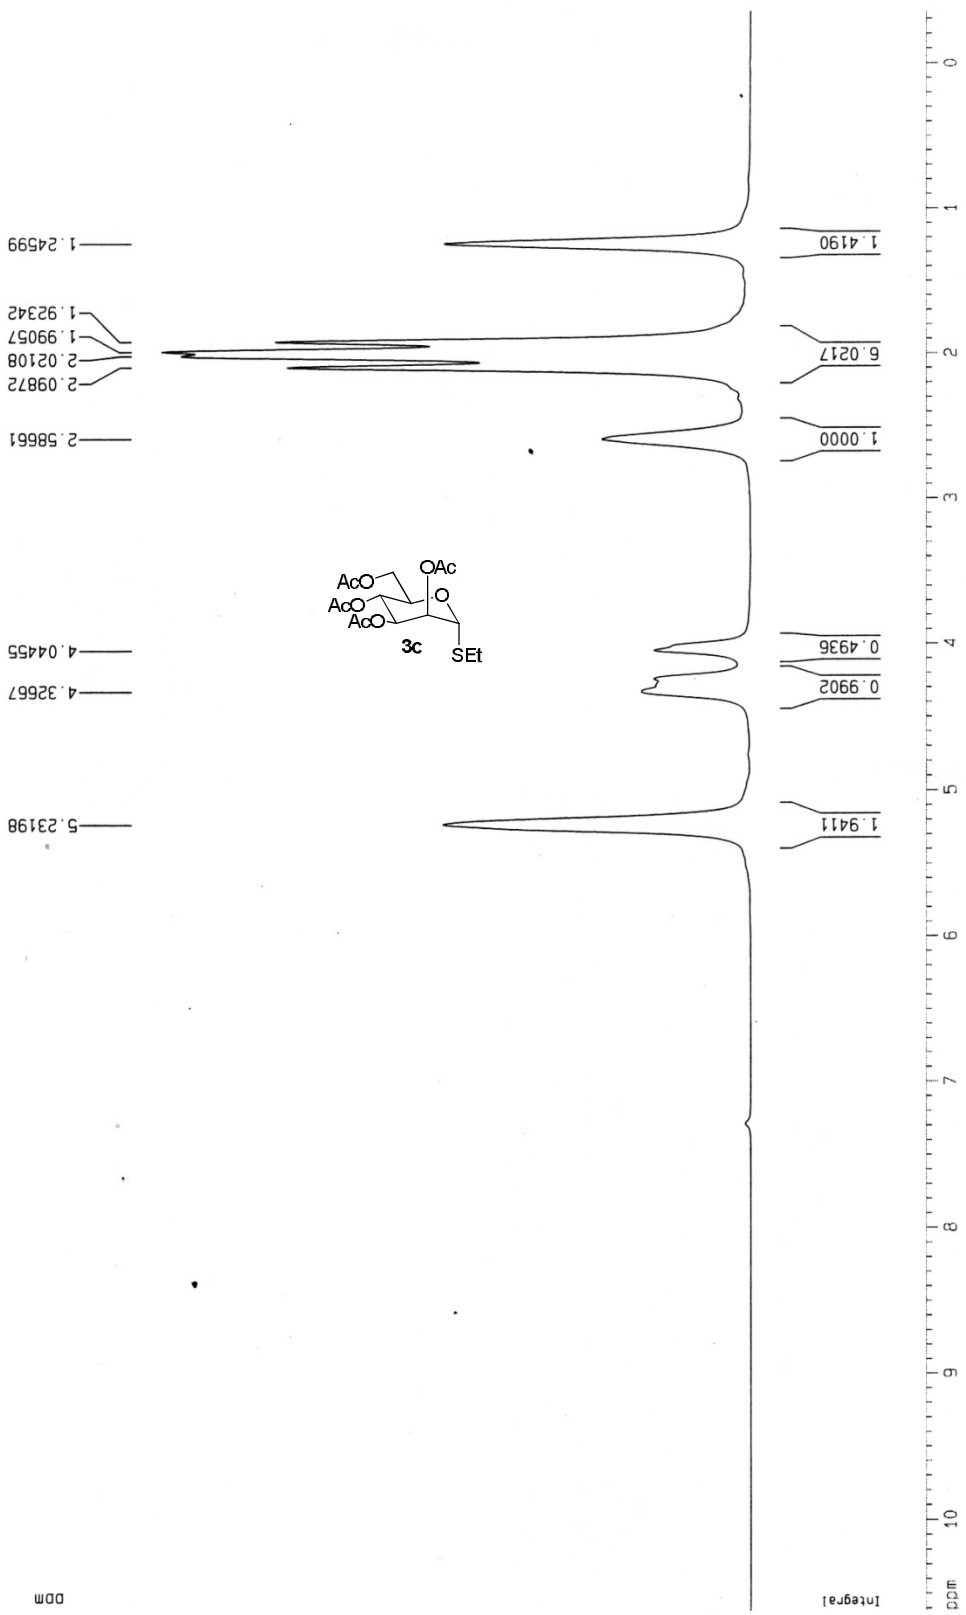

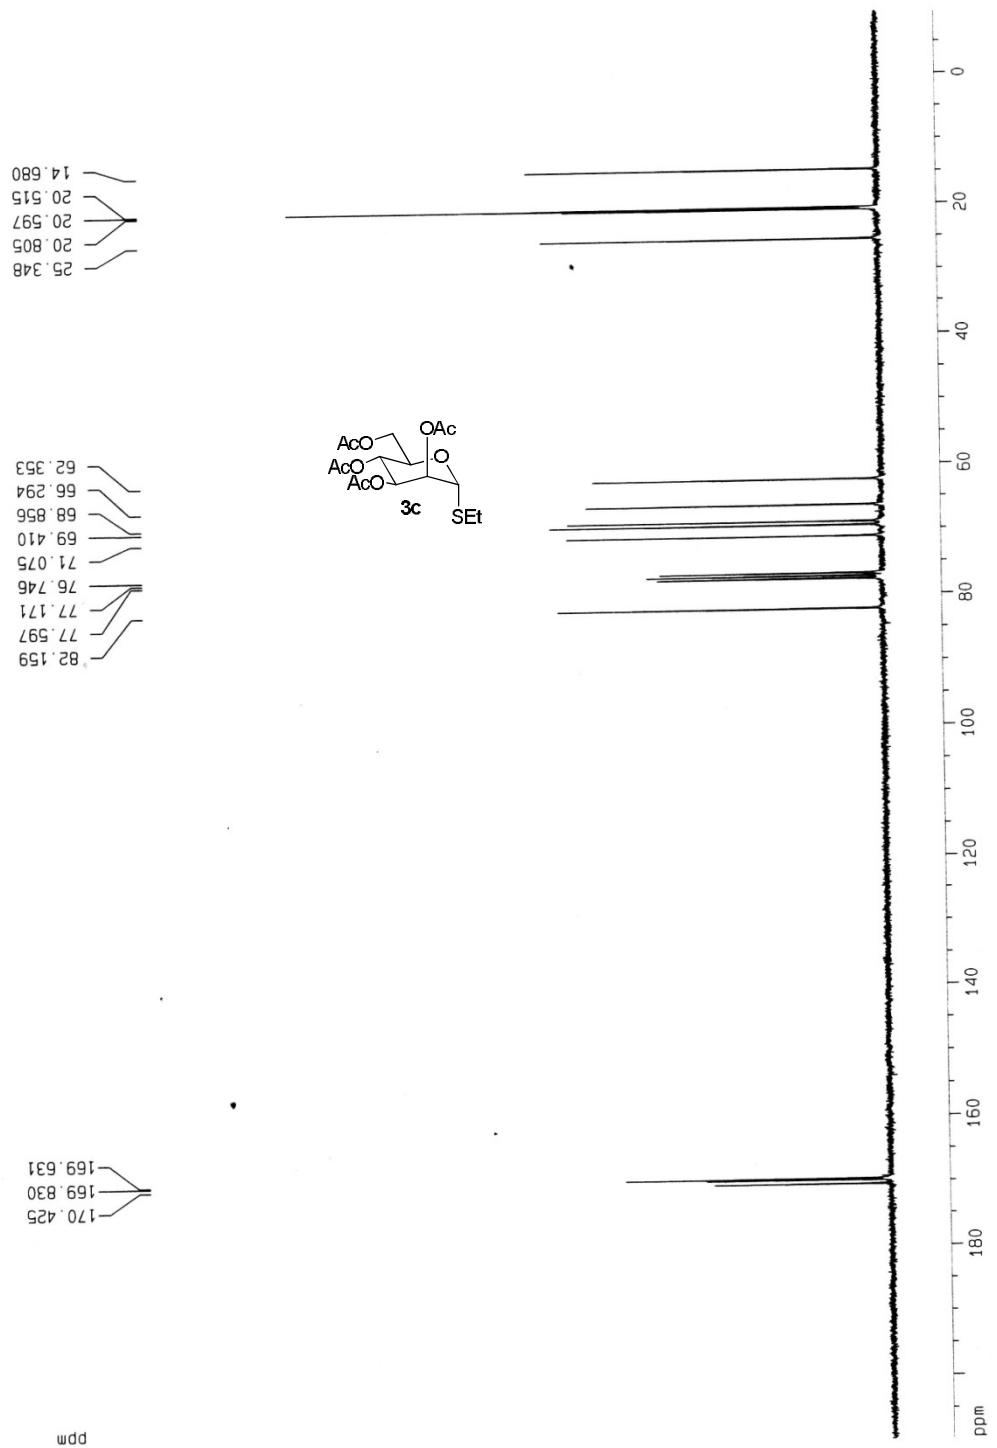

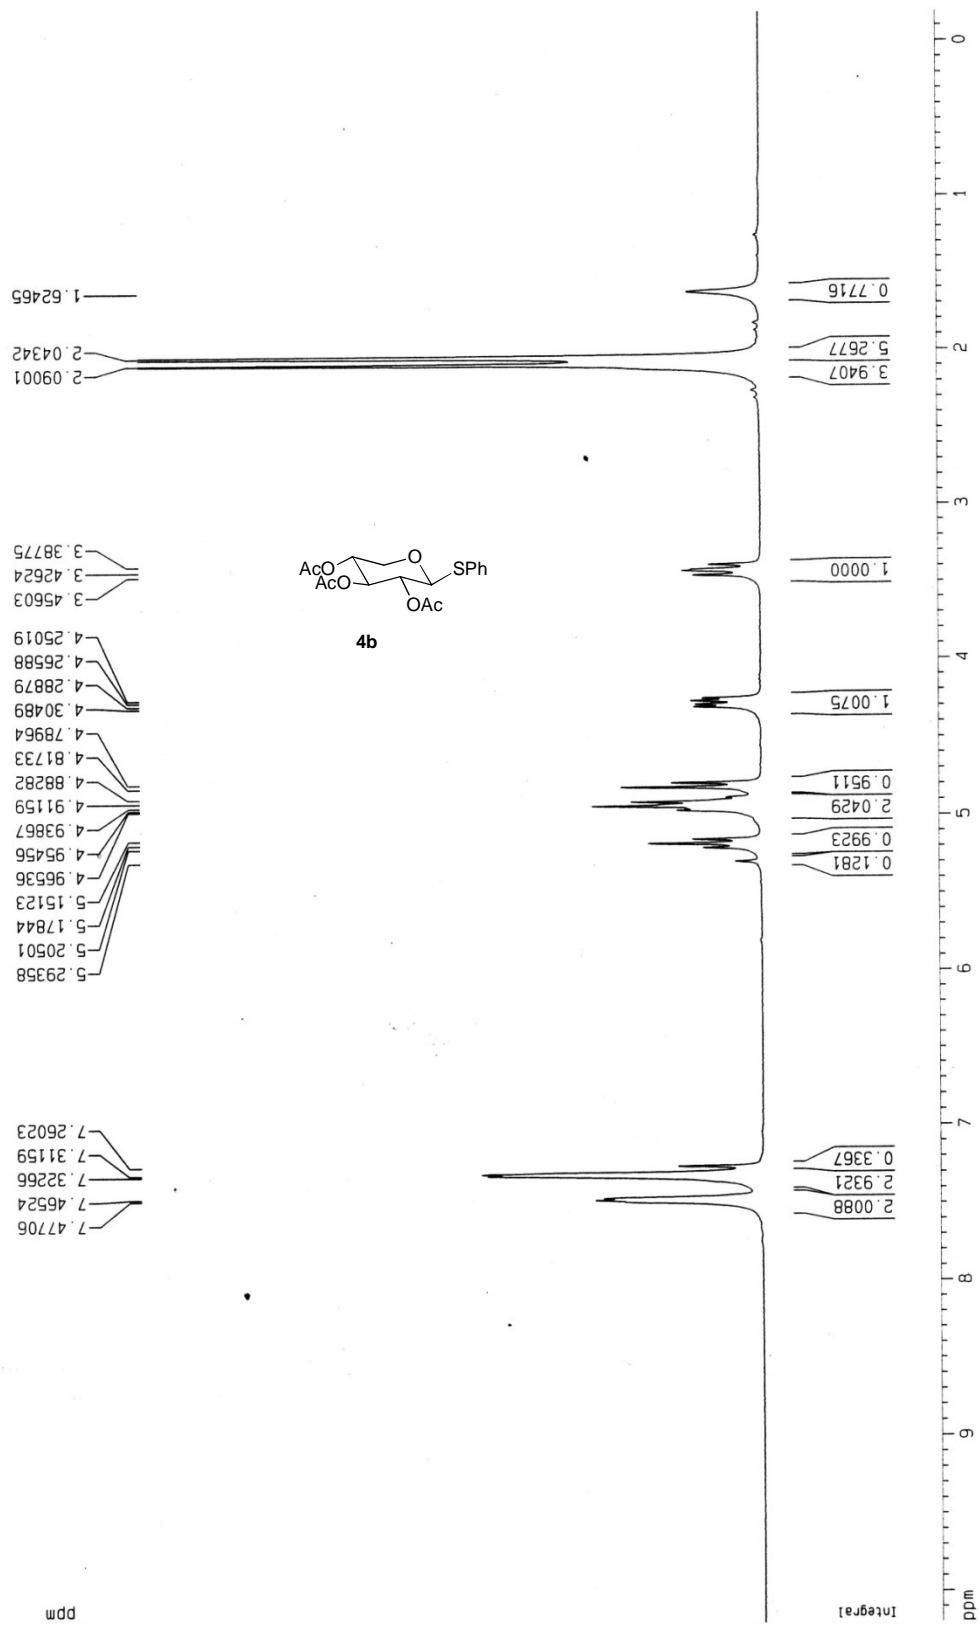

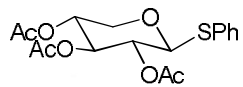

4b

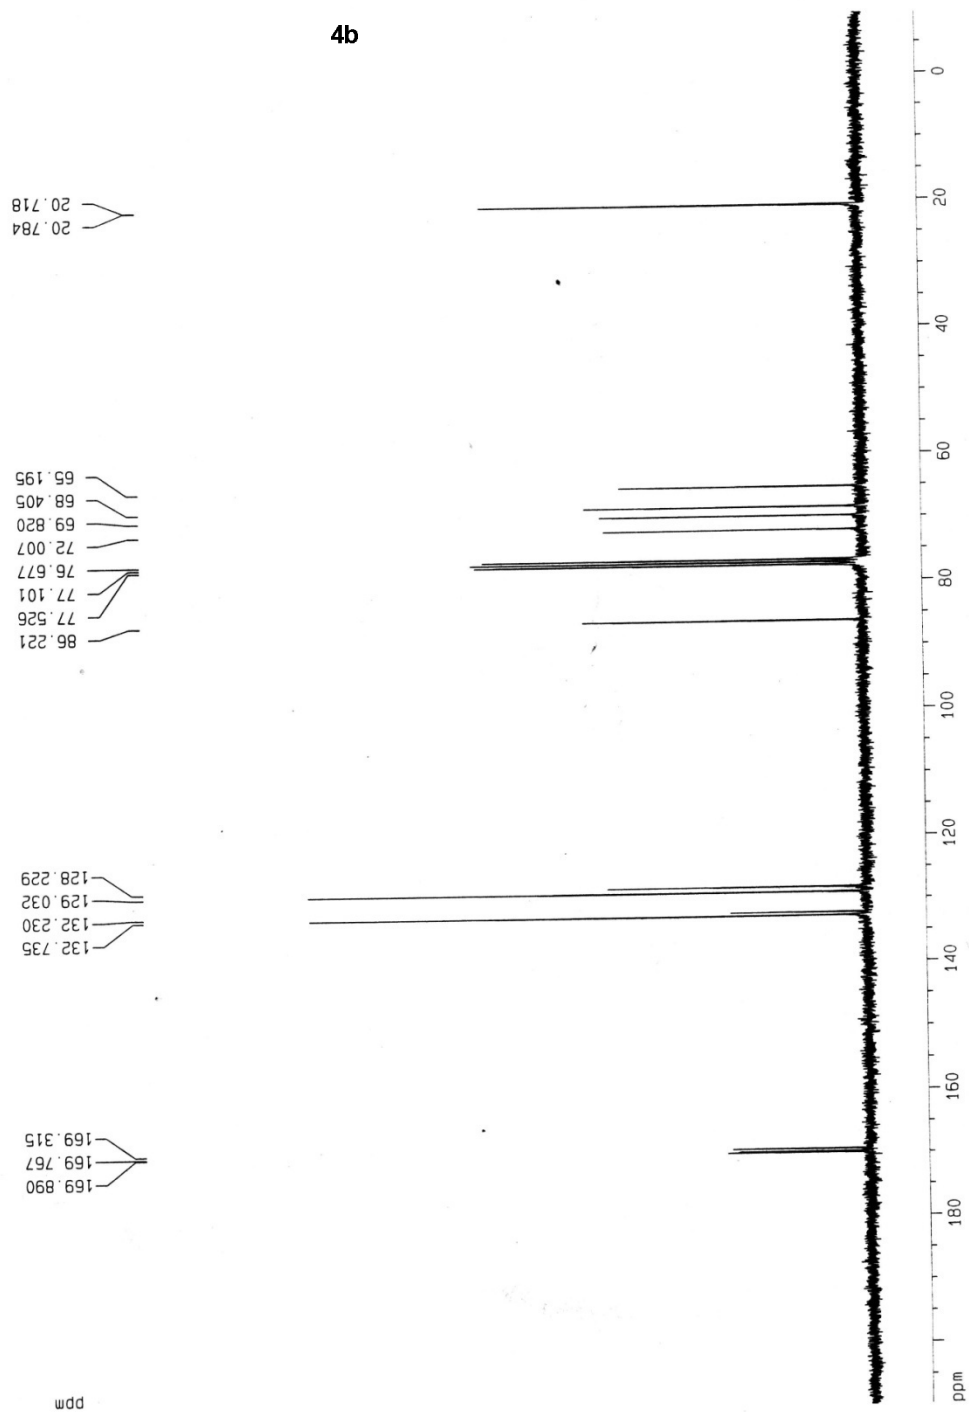

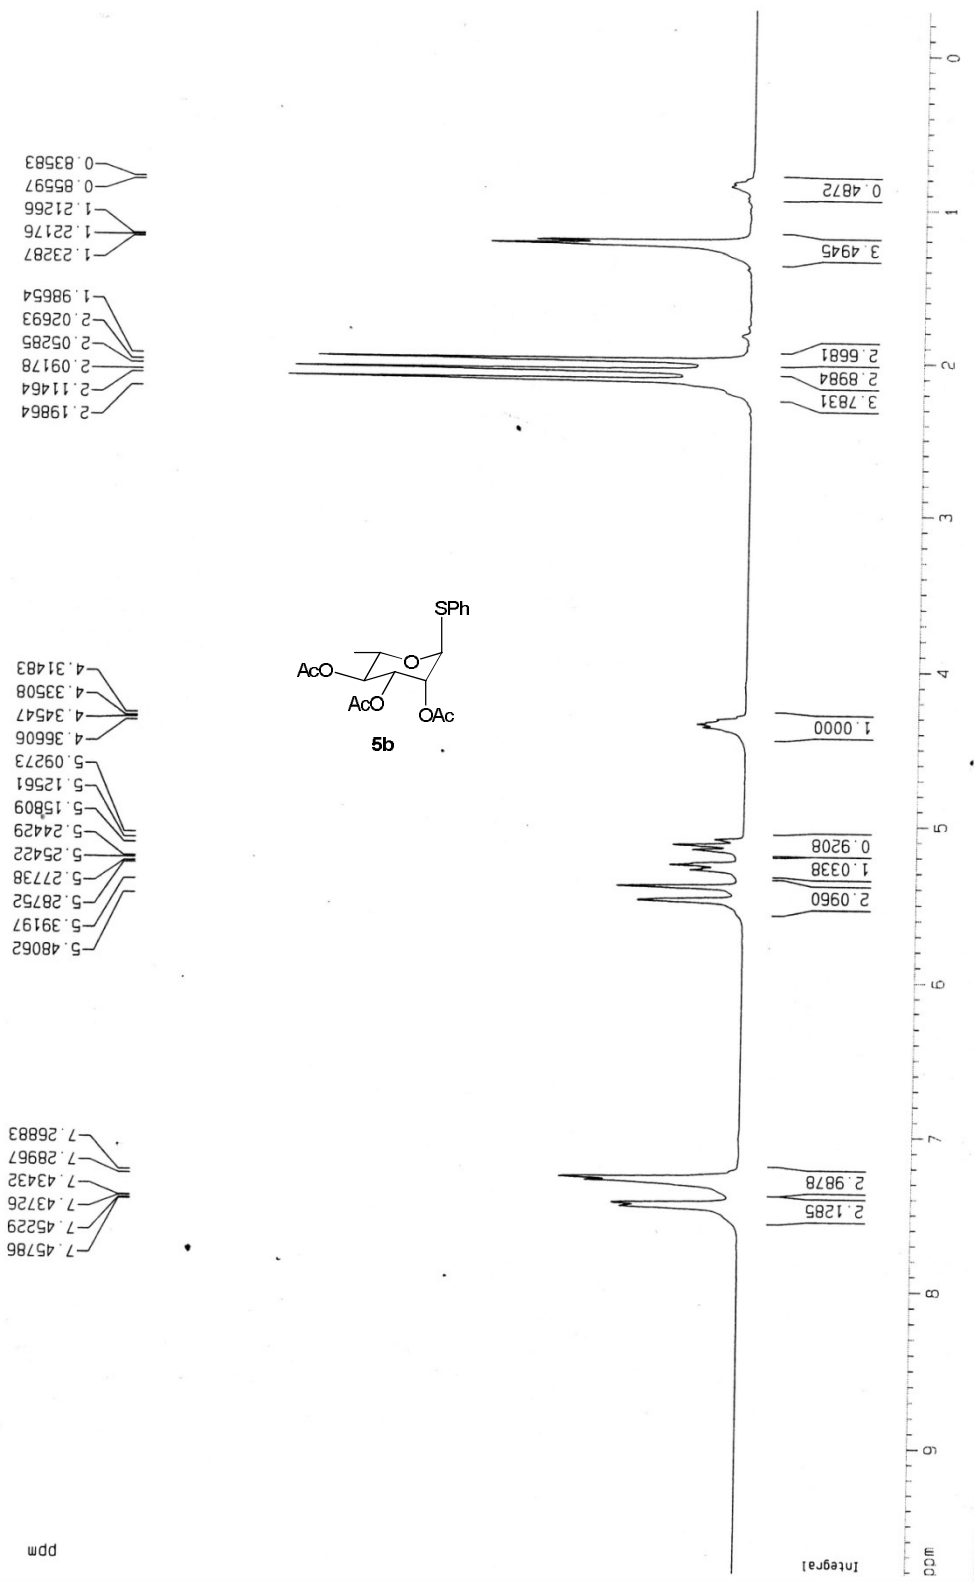

17.321  
20.641  
20.768  
20.856

67.766  
69.384  
71.126  
71.306  
76.707  
77.131  
77.555  
85.669

127.862  
129.165  
131.827  
133.253

169.836  
169.917

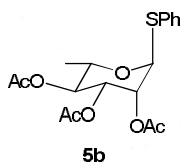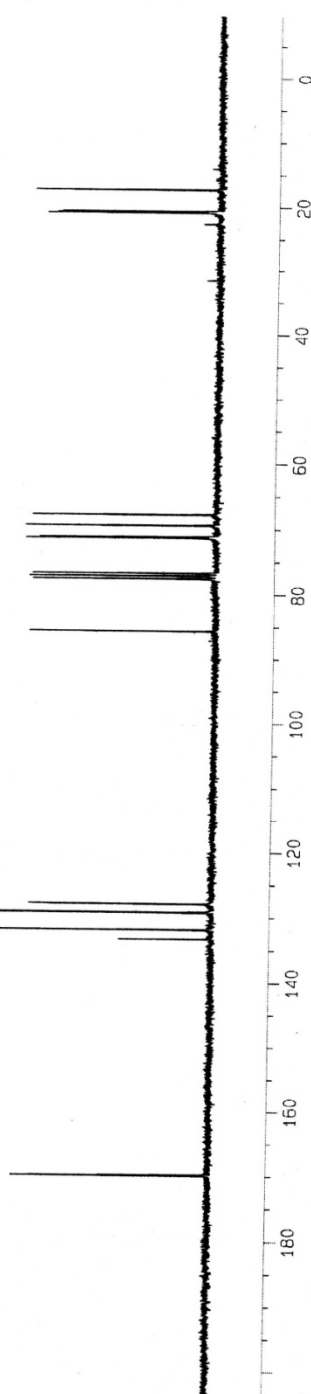

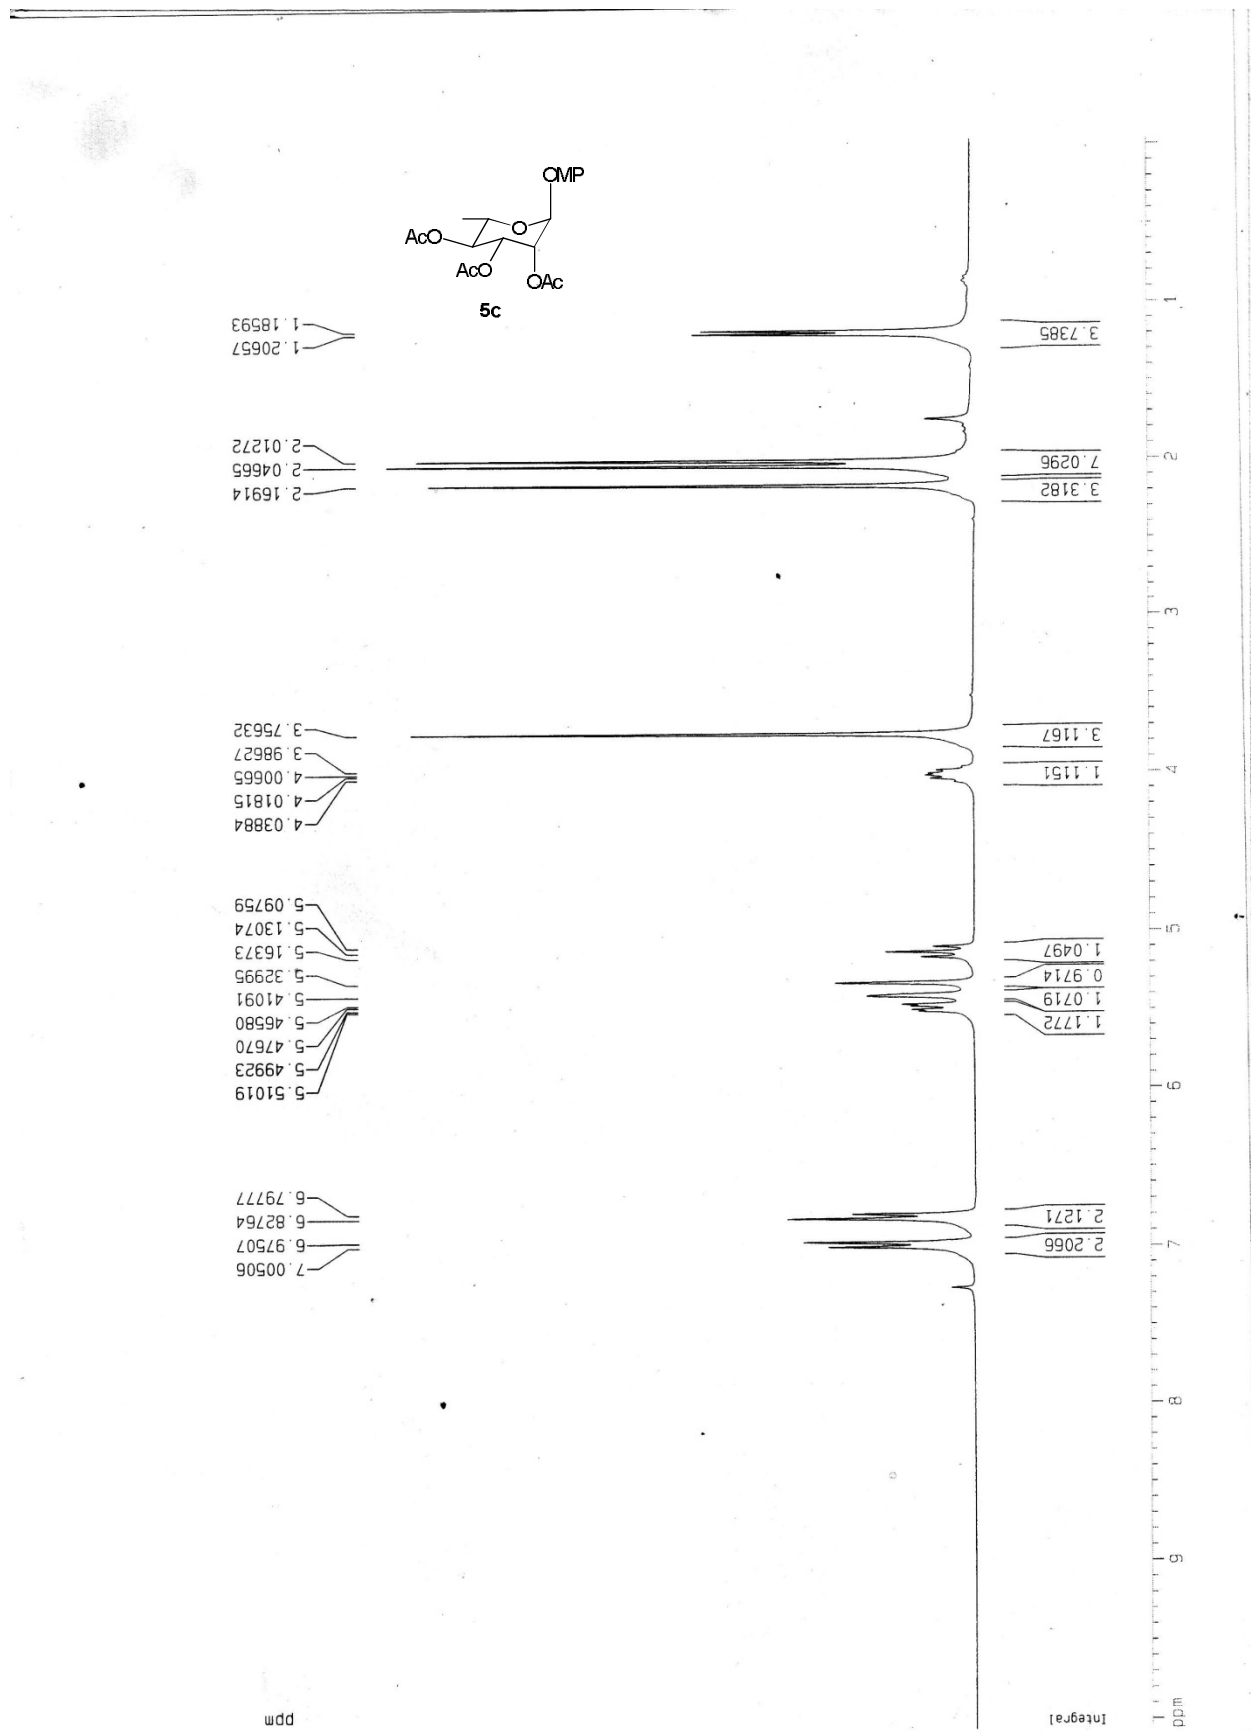



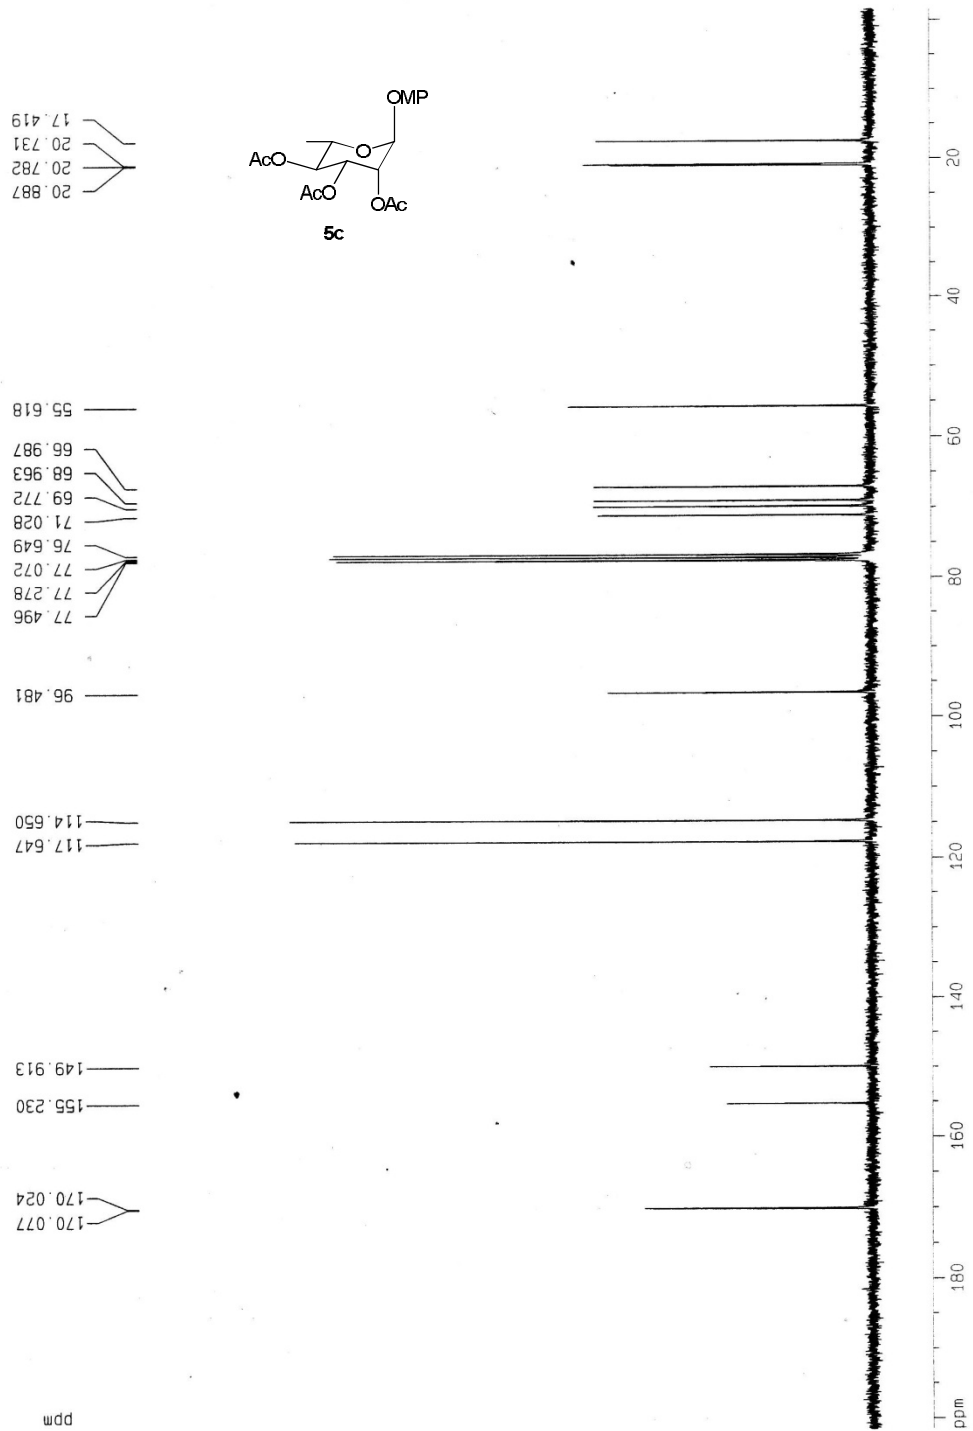

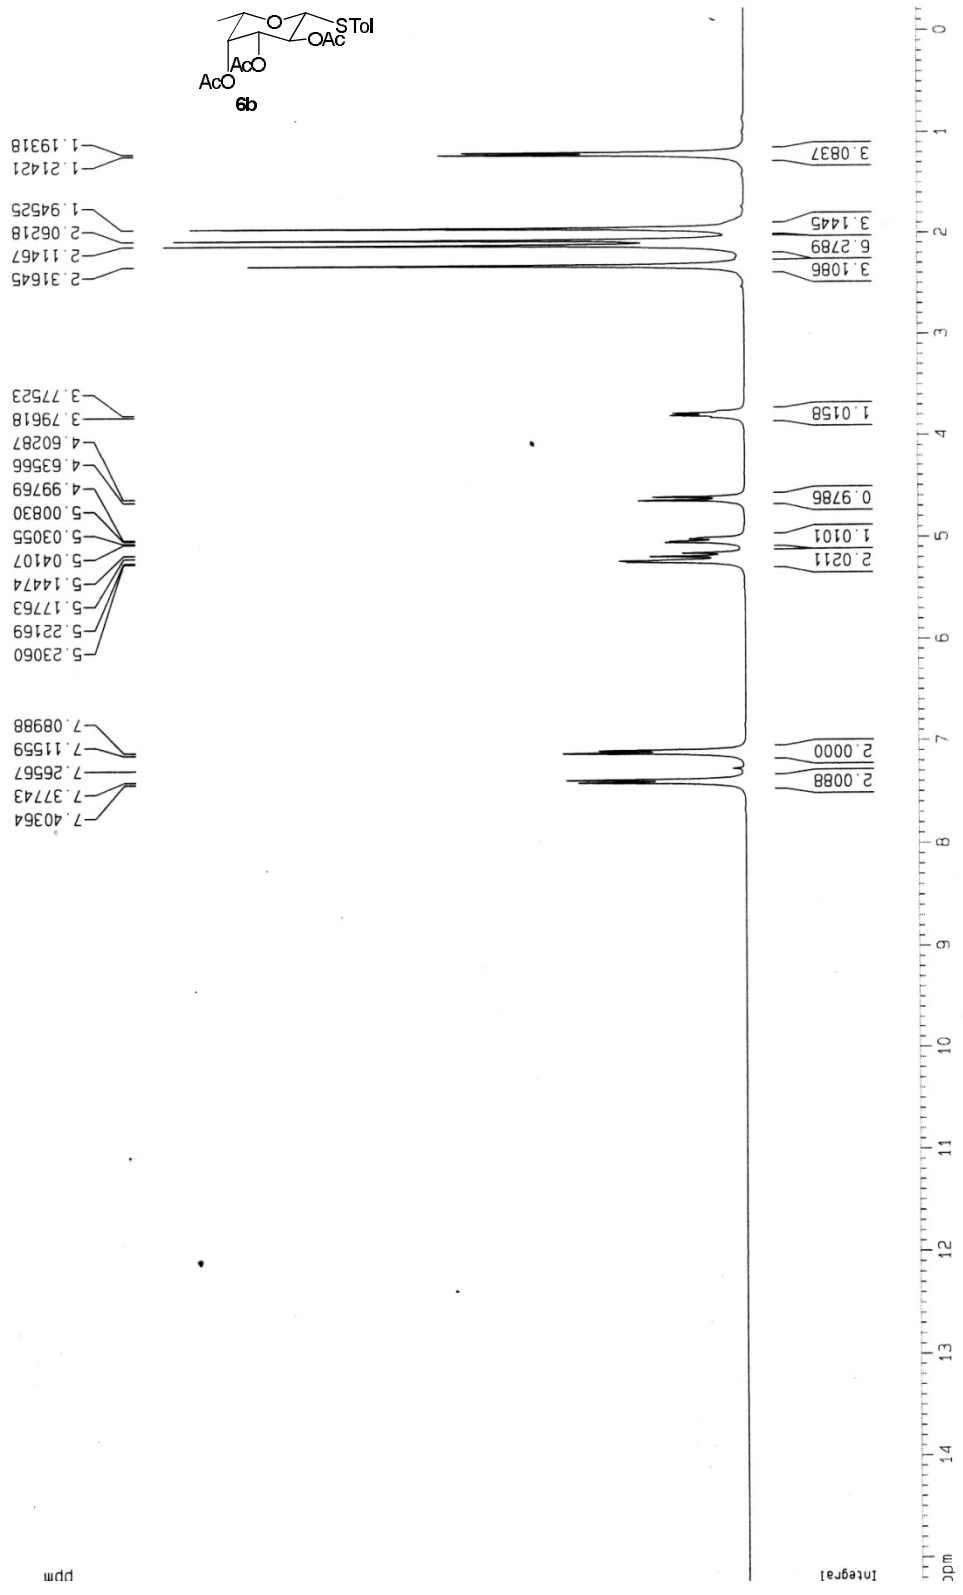

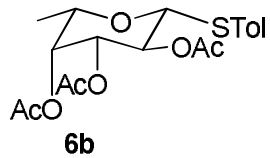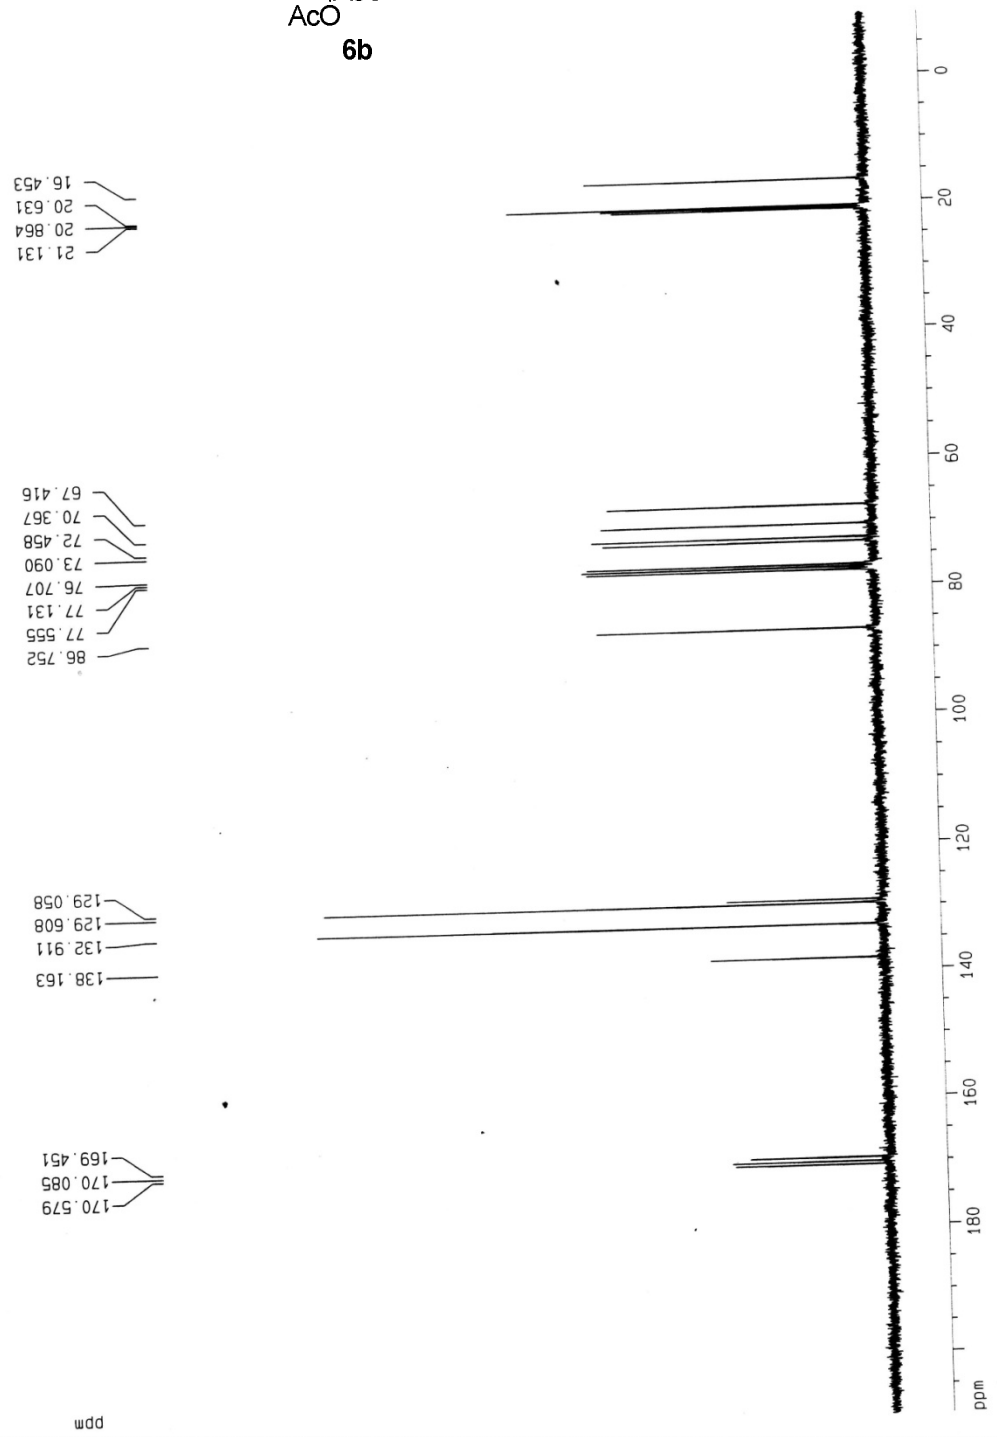

1.60705  
 1.83521  
 1.88149  
 1.92385  
 2.02117  
 2.10033  
 3.88819  
 3.89610  
 3.90573  
 3.91333  
 3.92212  
 3.92980  
 4.18725  
 4.22072  
 4.22786  
 4.26009  
 4.27669  
 4.30084  
 4.31636  
 4.35034  
 4.38482  
 5.10486  
 5.13775  
 5.16932  
 5.69490  
 5.73010  
 5.76121  
 5.79448  
 5.82574  
 7.25995  
 7.28549  
 7.39482  
 7.40296  
 7.41400  
 7.42053  
 7.42592  
 7.74060  
 7.75090  
 7.75903  
 7.76908  
 7.85499  
 7.86553  
 7.87282  
 7.88322

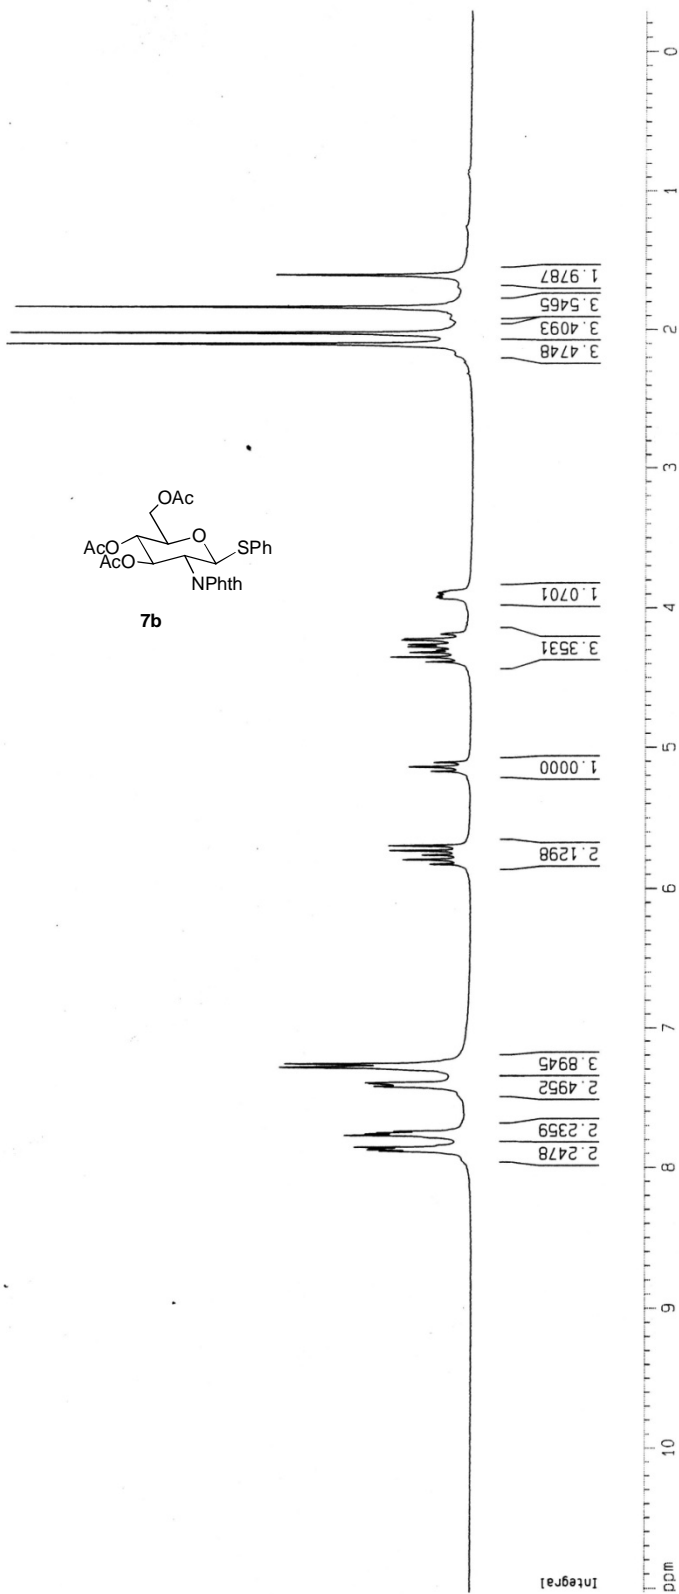

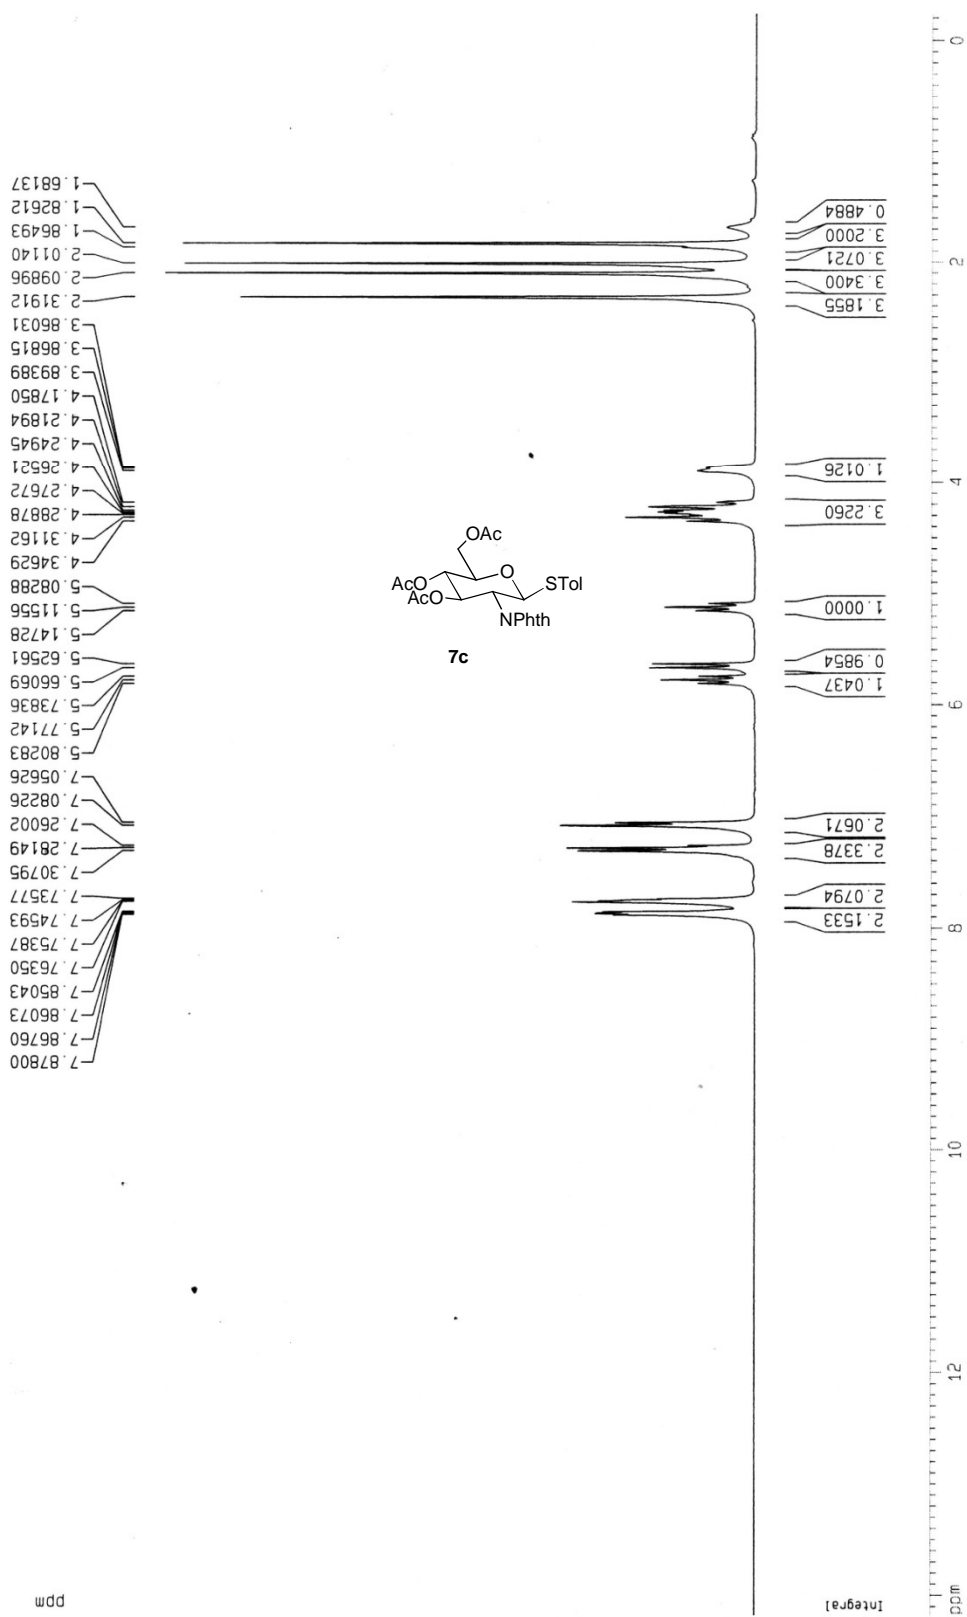

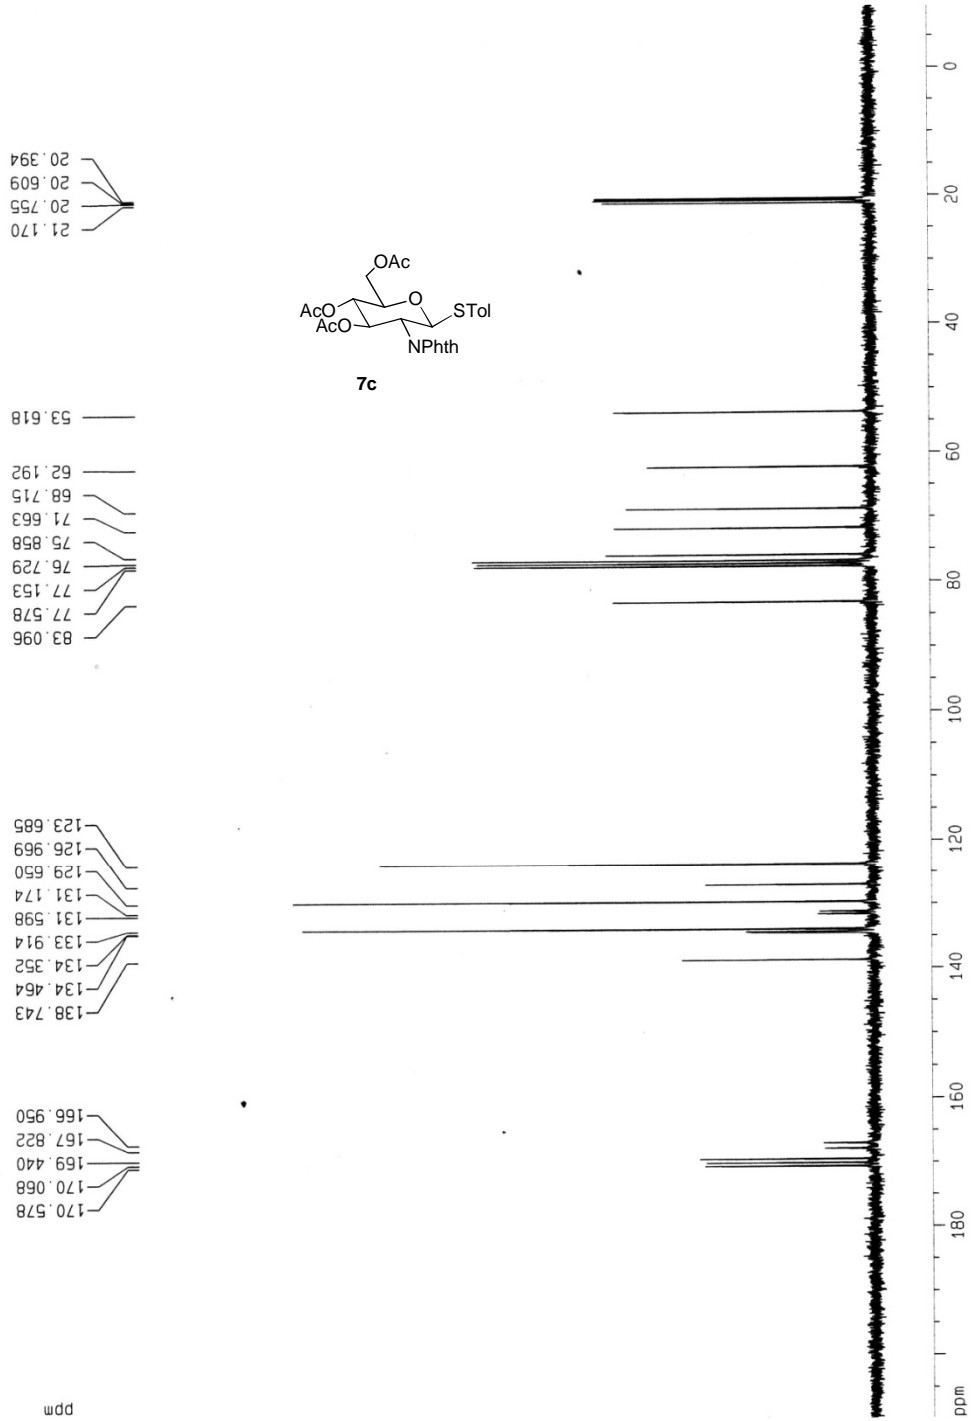

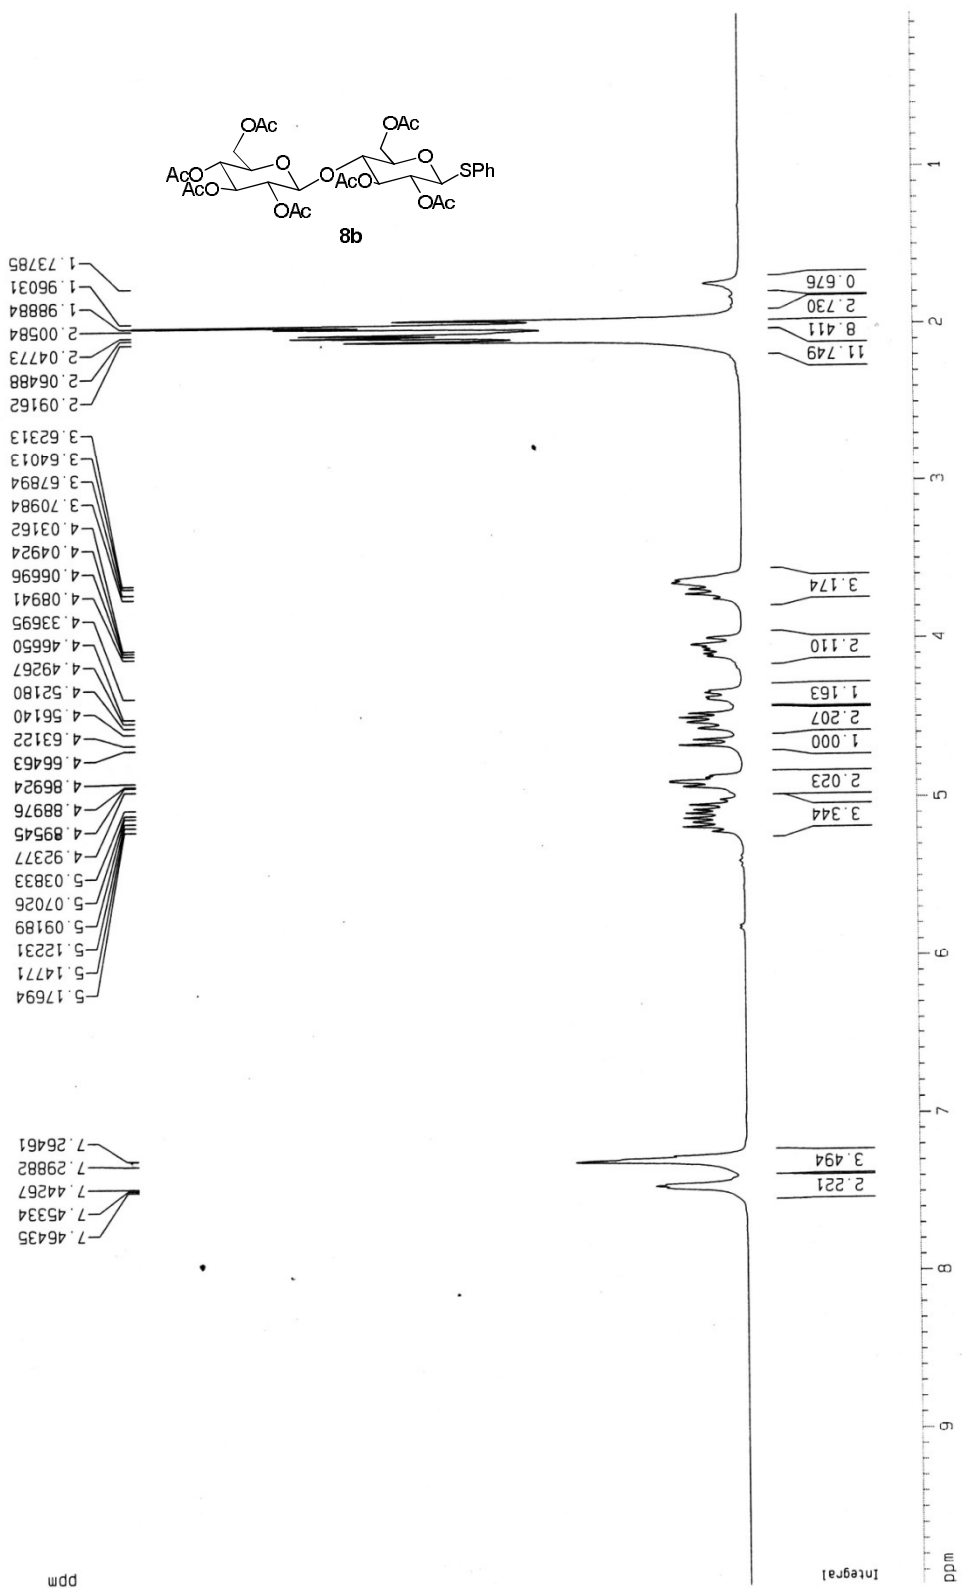

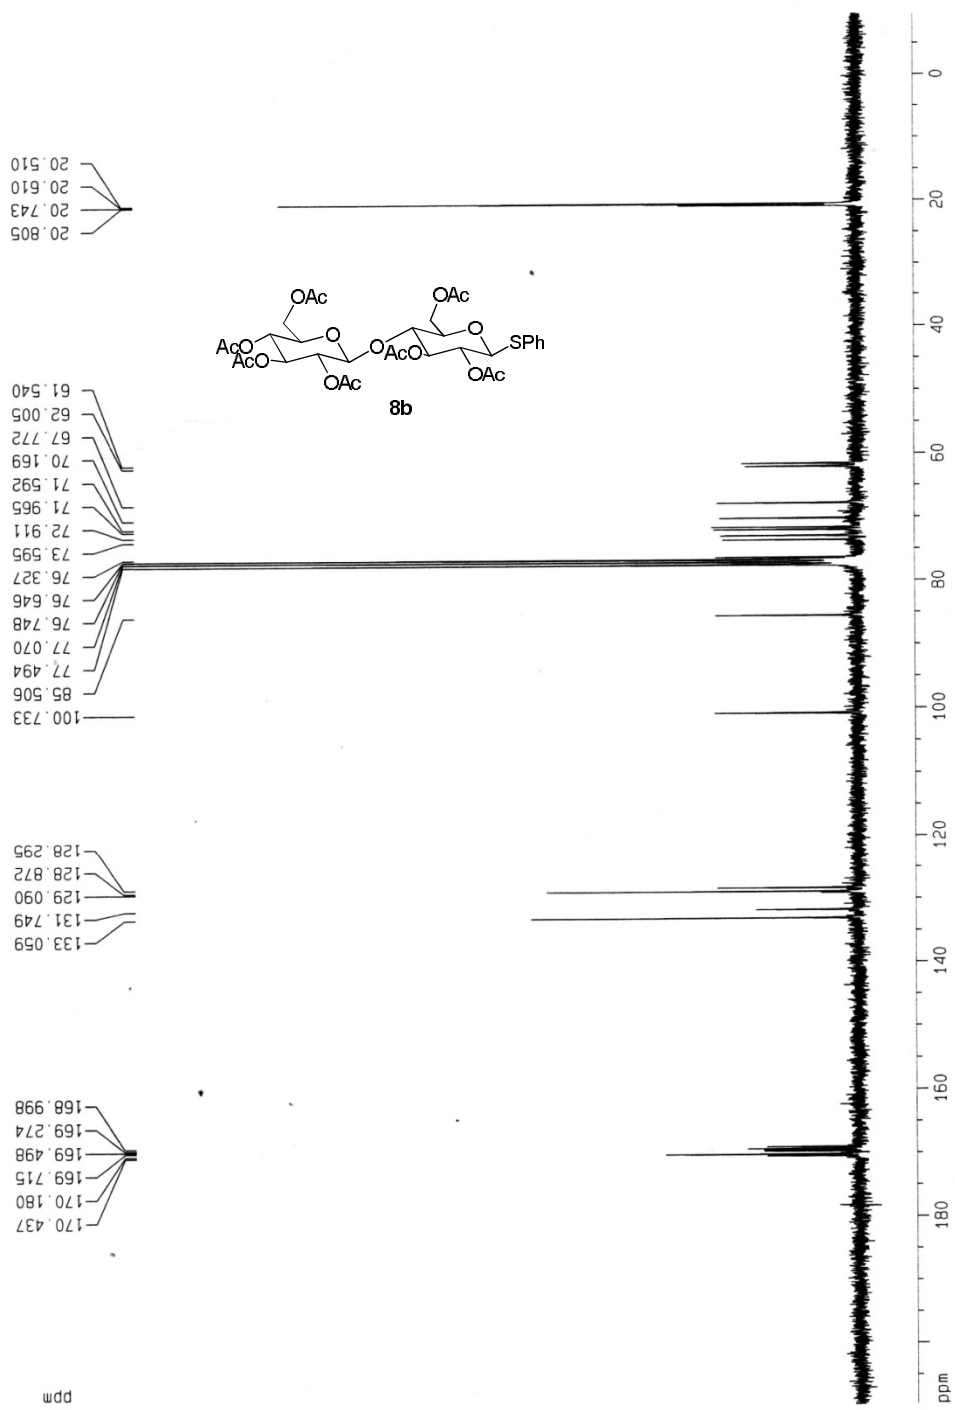



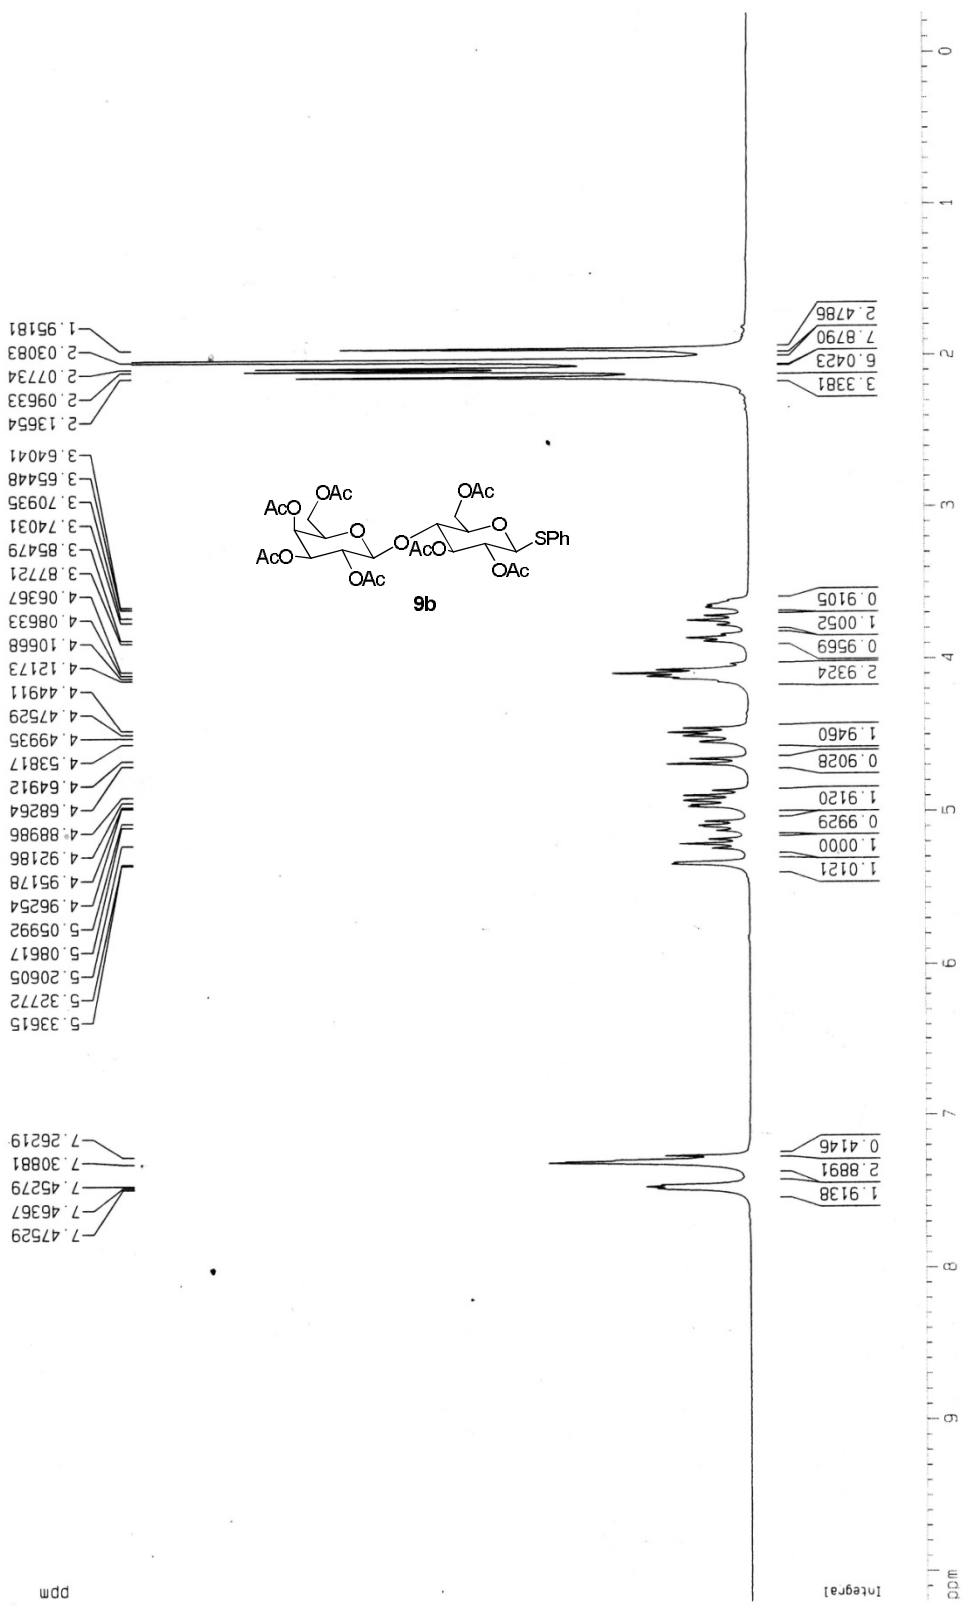

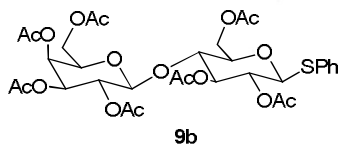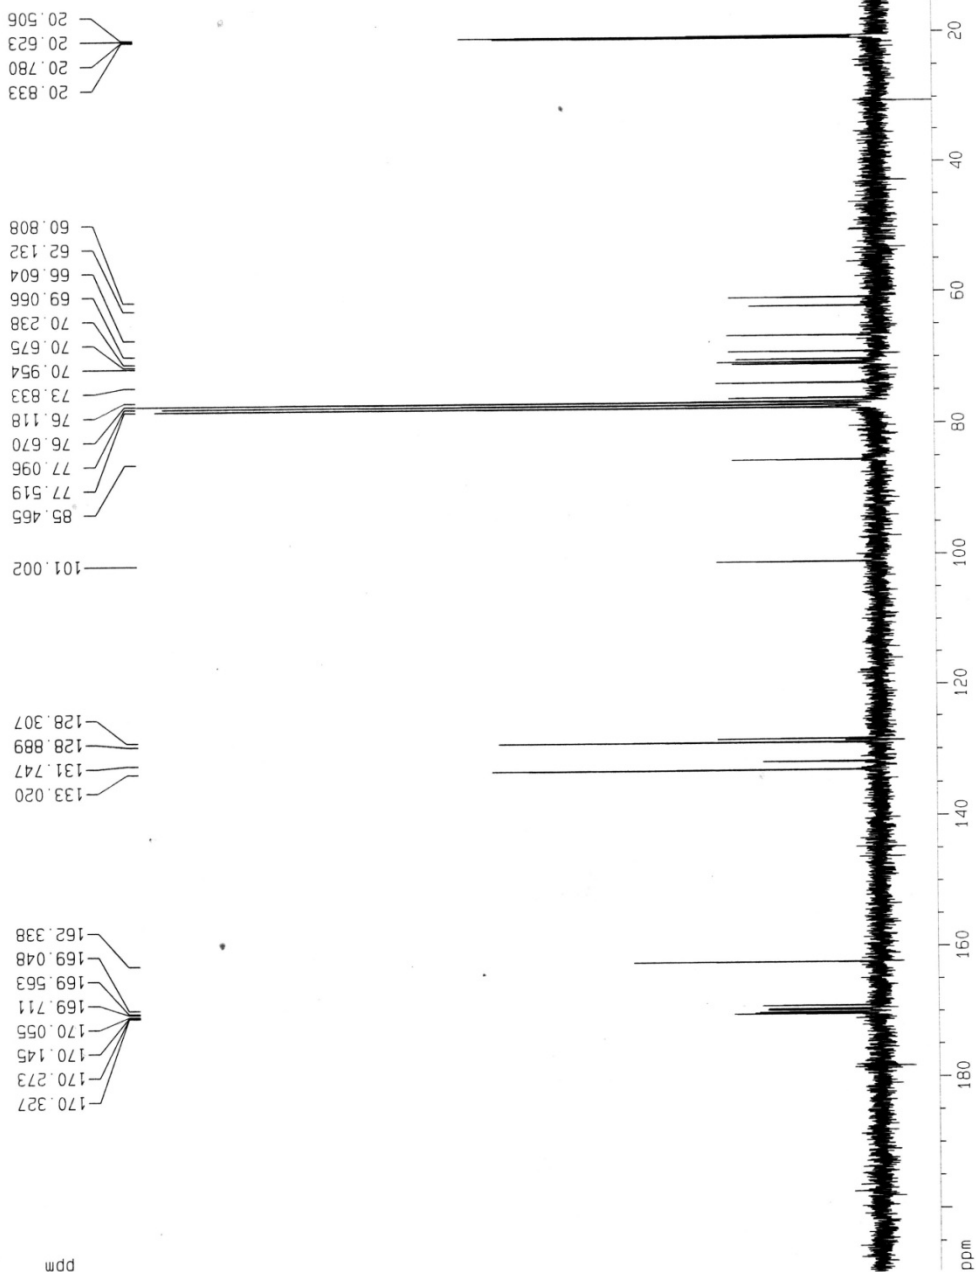

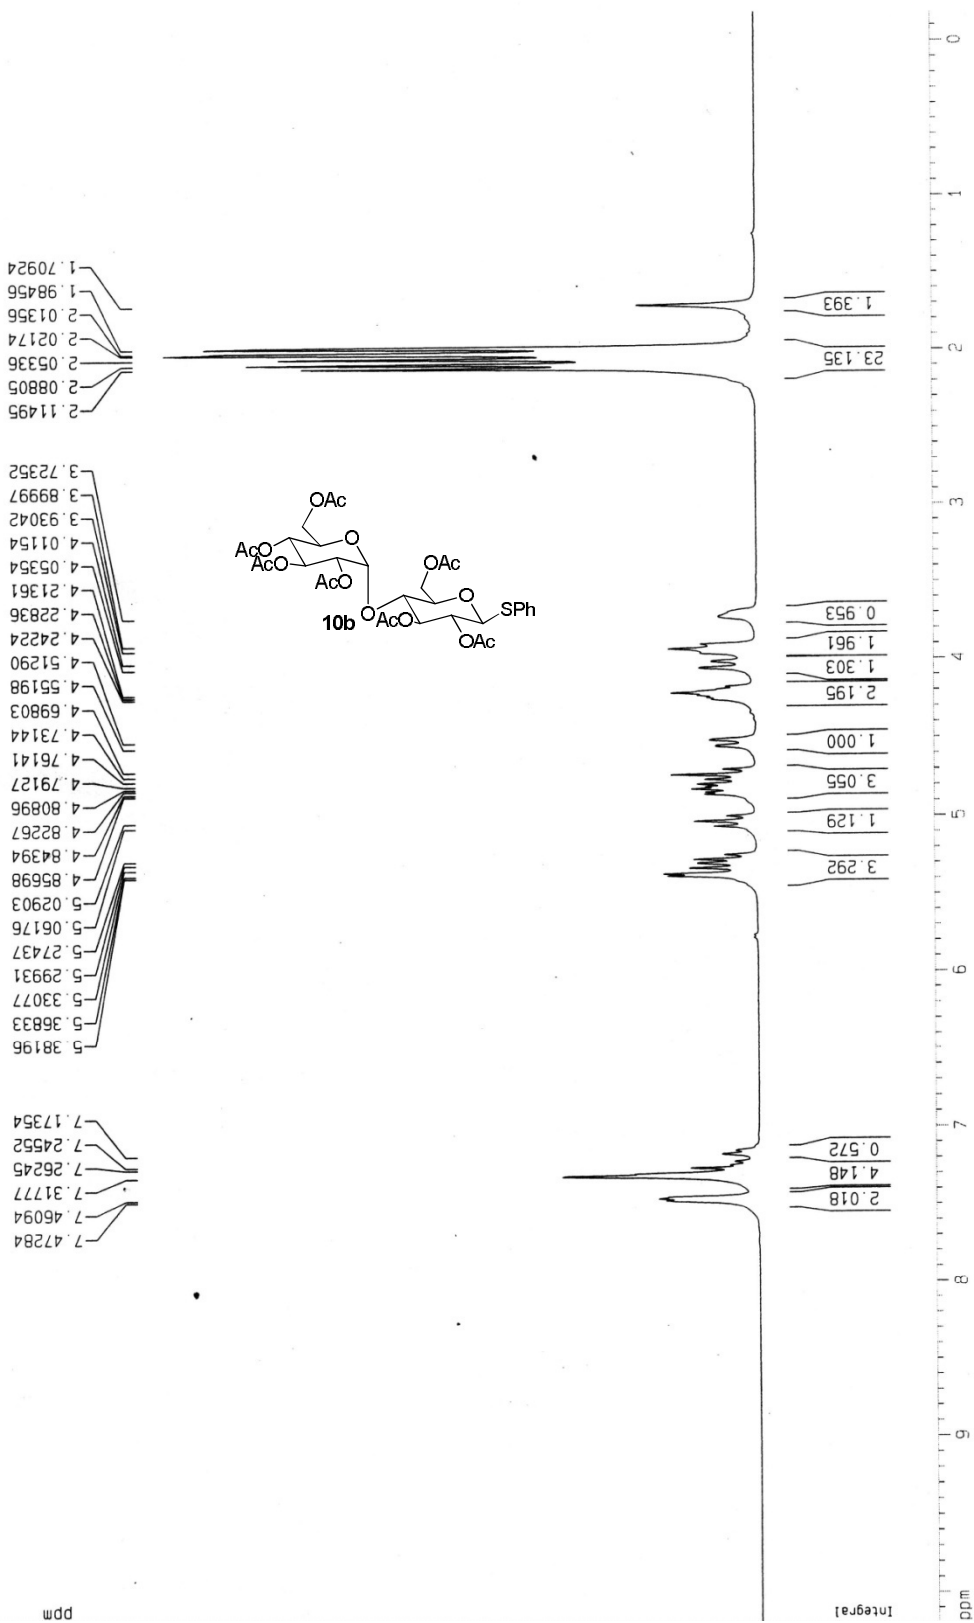

21.434  
20.888  
20.800  
20.701  
20.662  
20.570

61.518  
62.814  
68.014  
68.520  
69.293  
69.971  
70.667  
72.459  
76.090  
76.441  
76.676  
77.101  
77.525  
85.020  
95.549

128.463  
128.896  
129.017  
129.138  
131.218  
133.381

169.414  
169.522  
169.897  
170.147  
170.330  
170.517

ppm

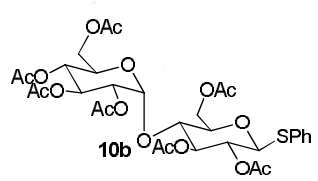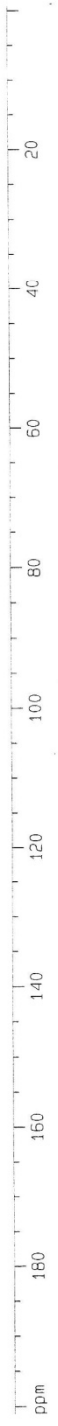

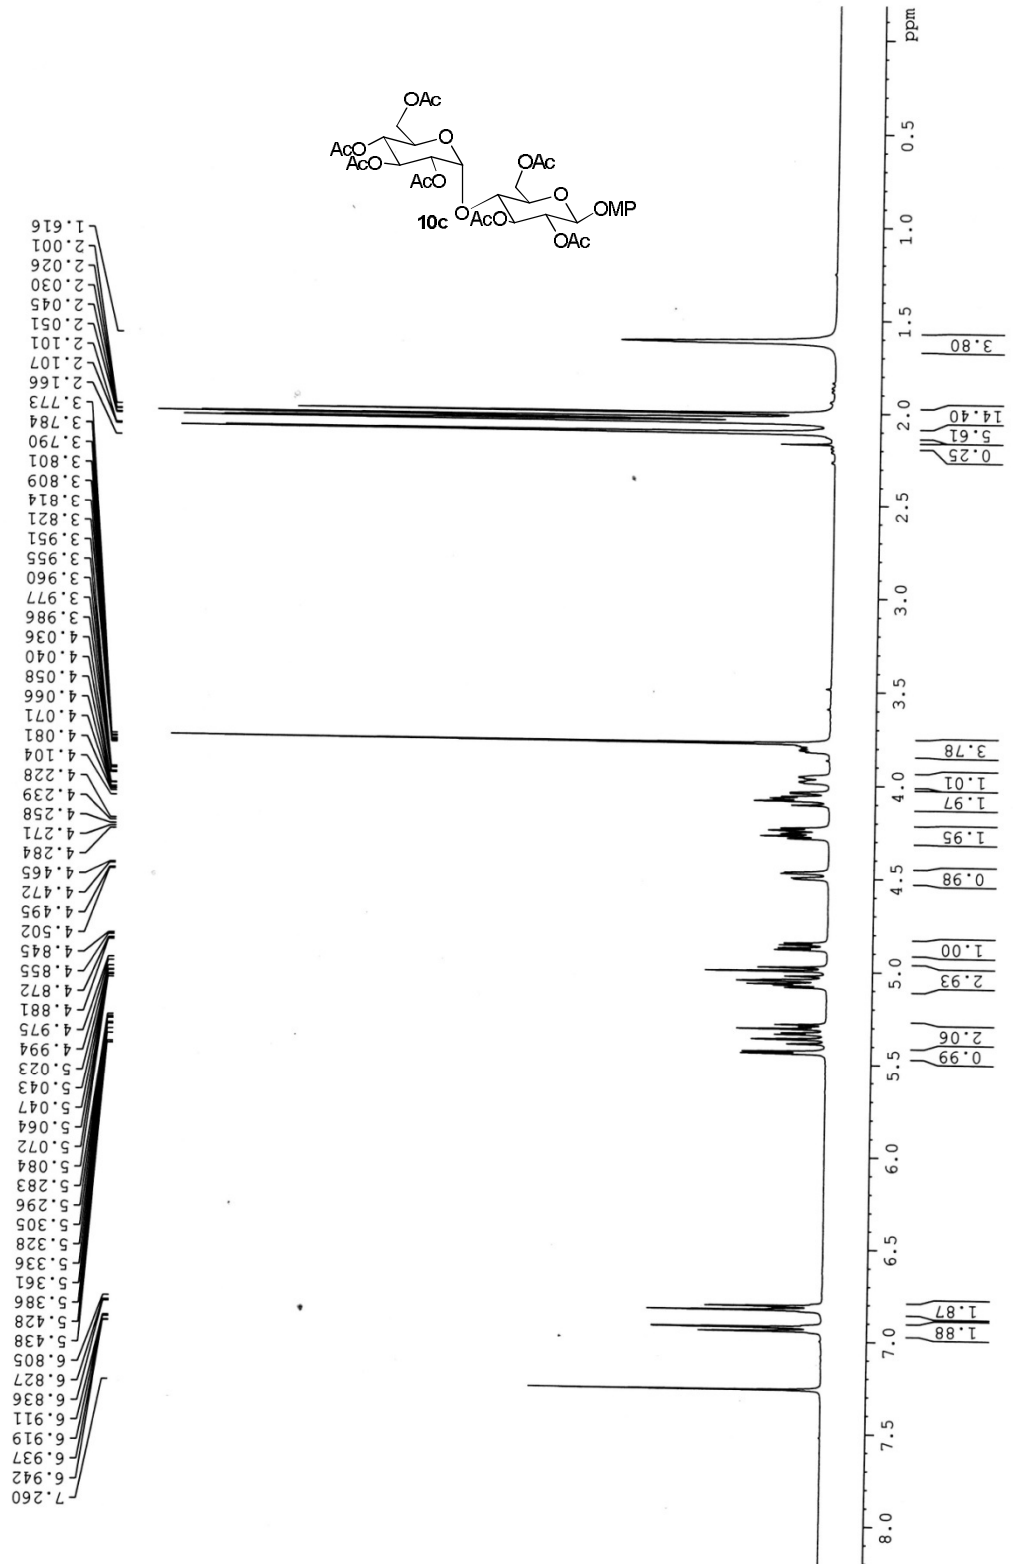

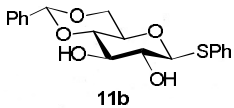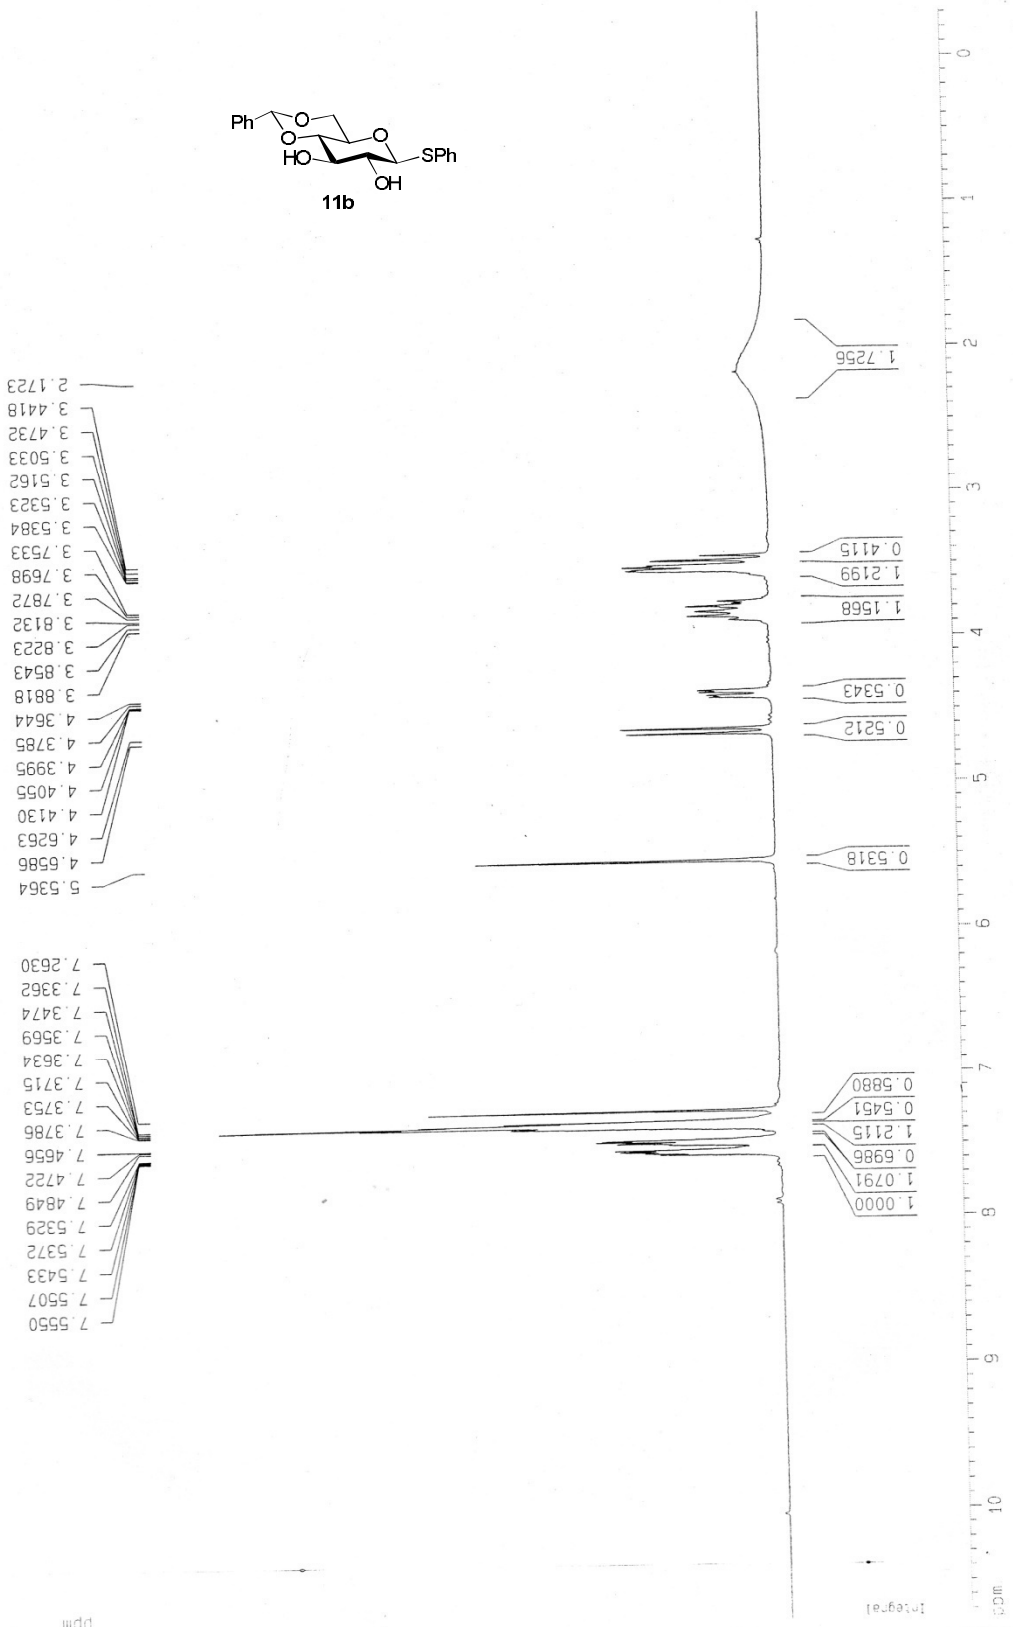

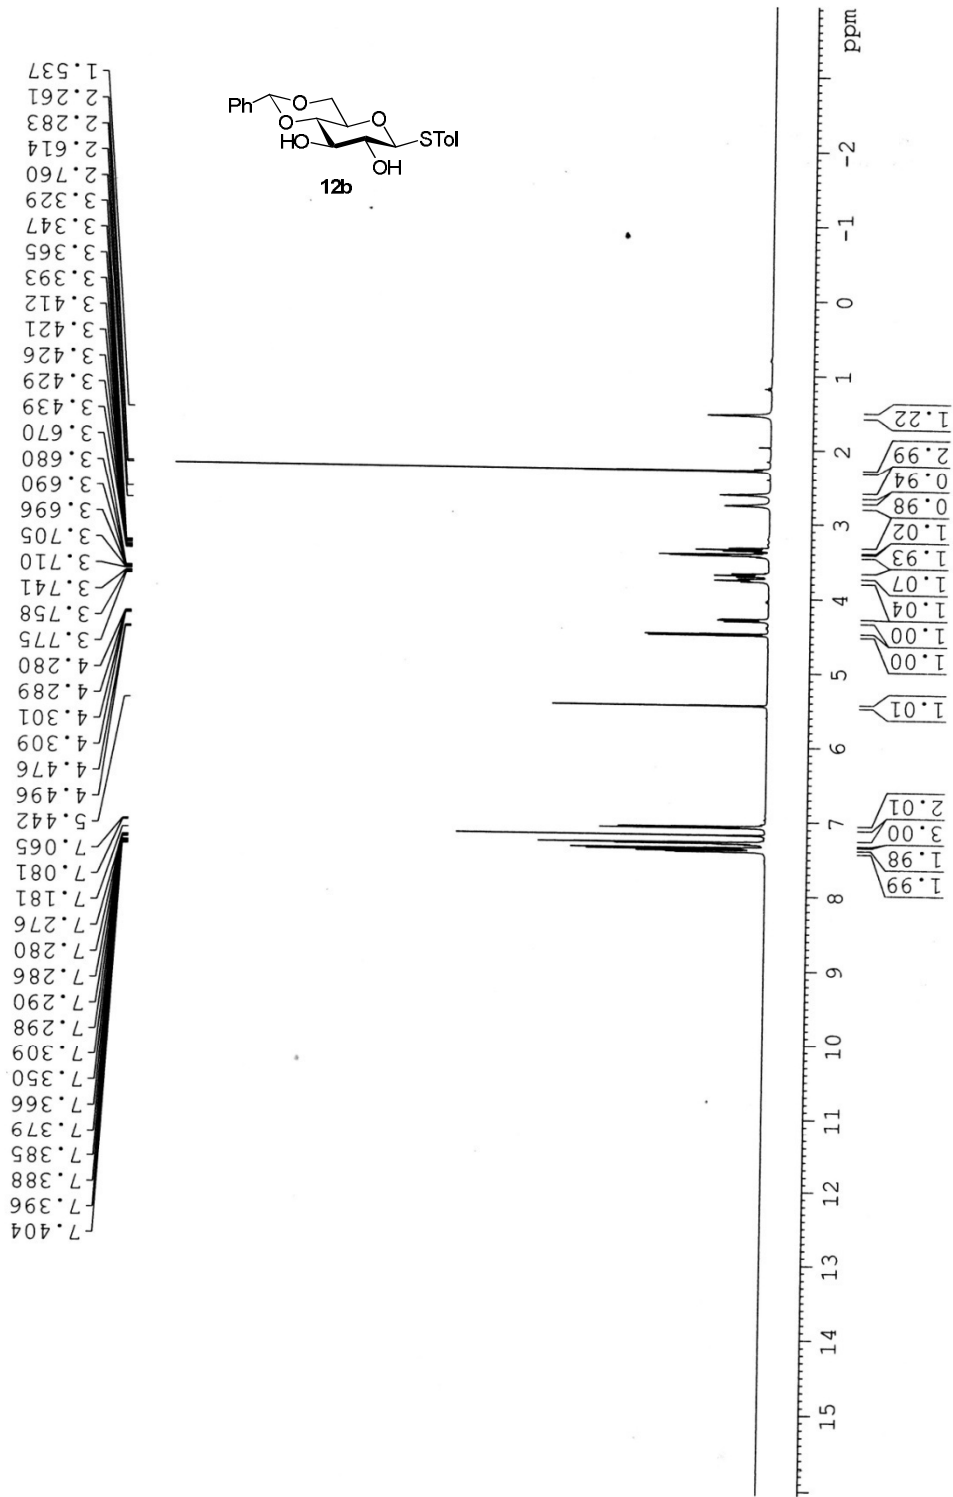

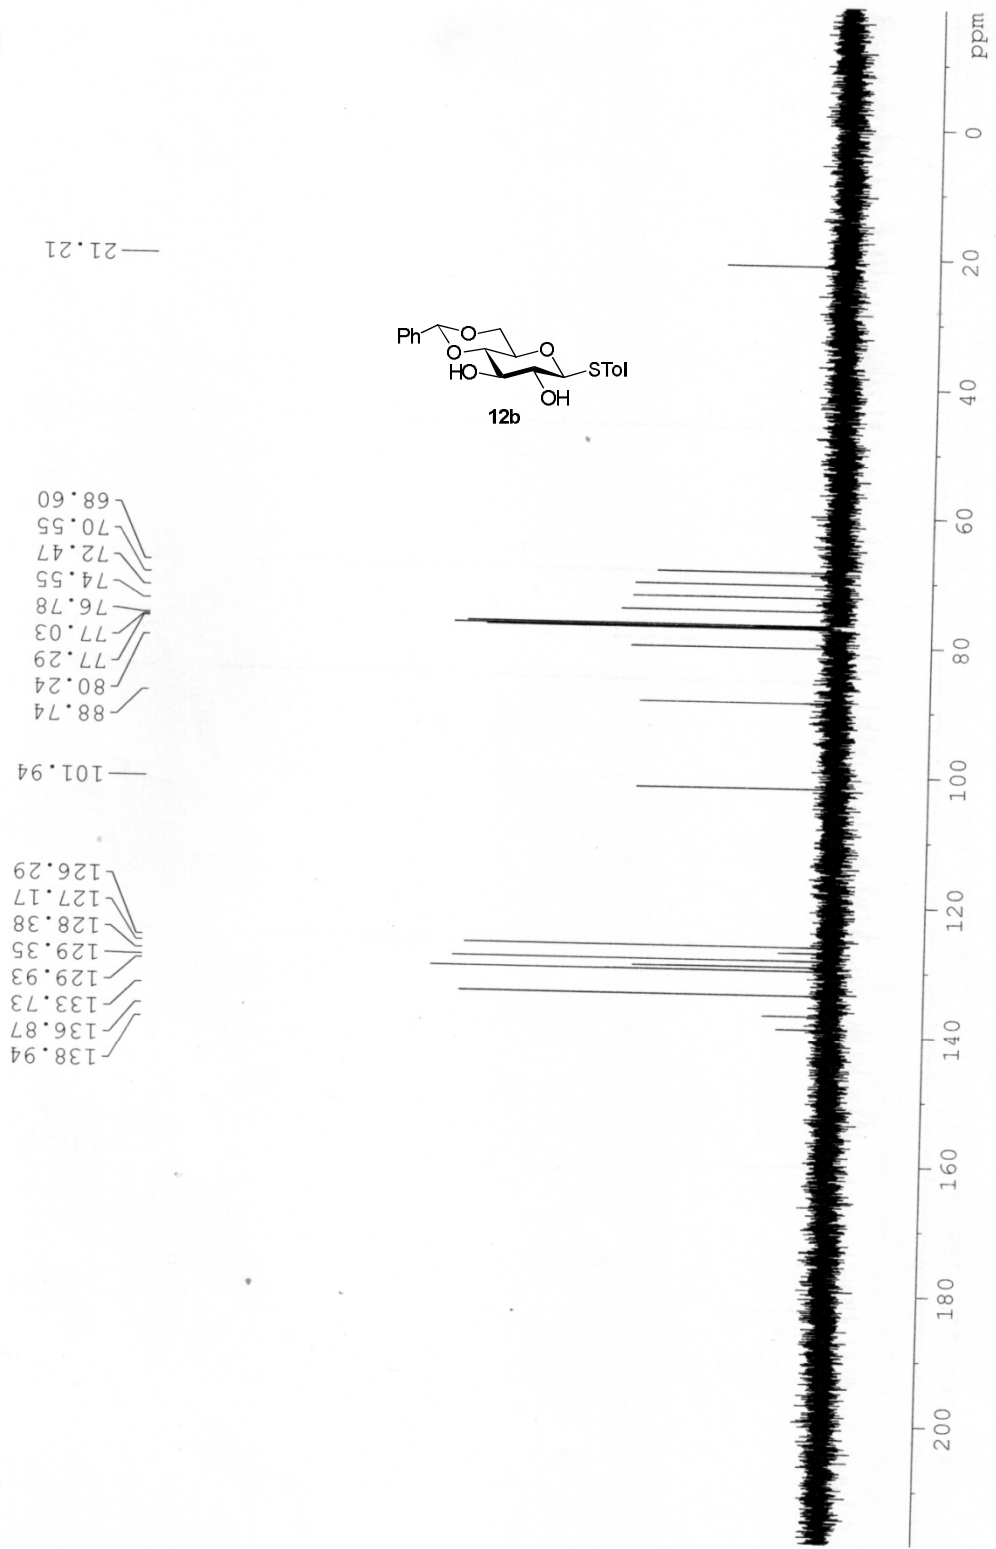



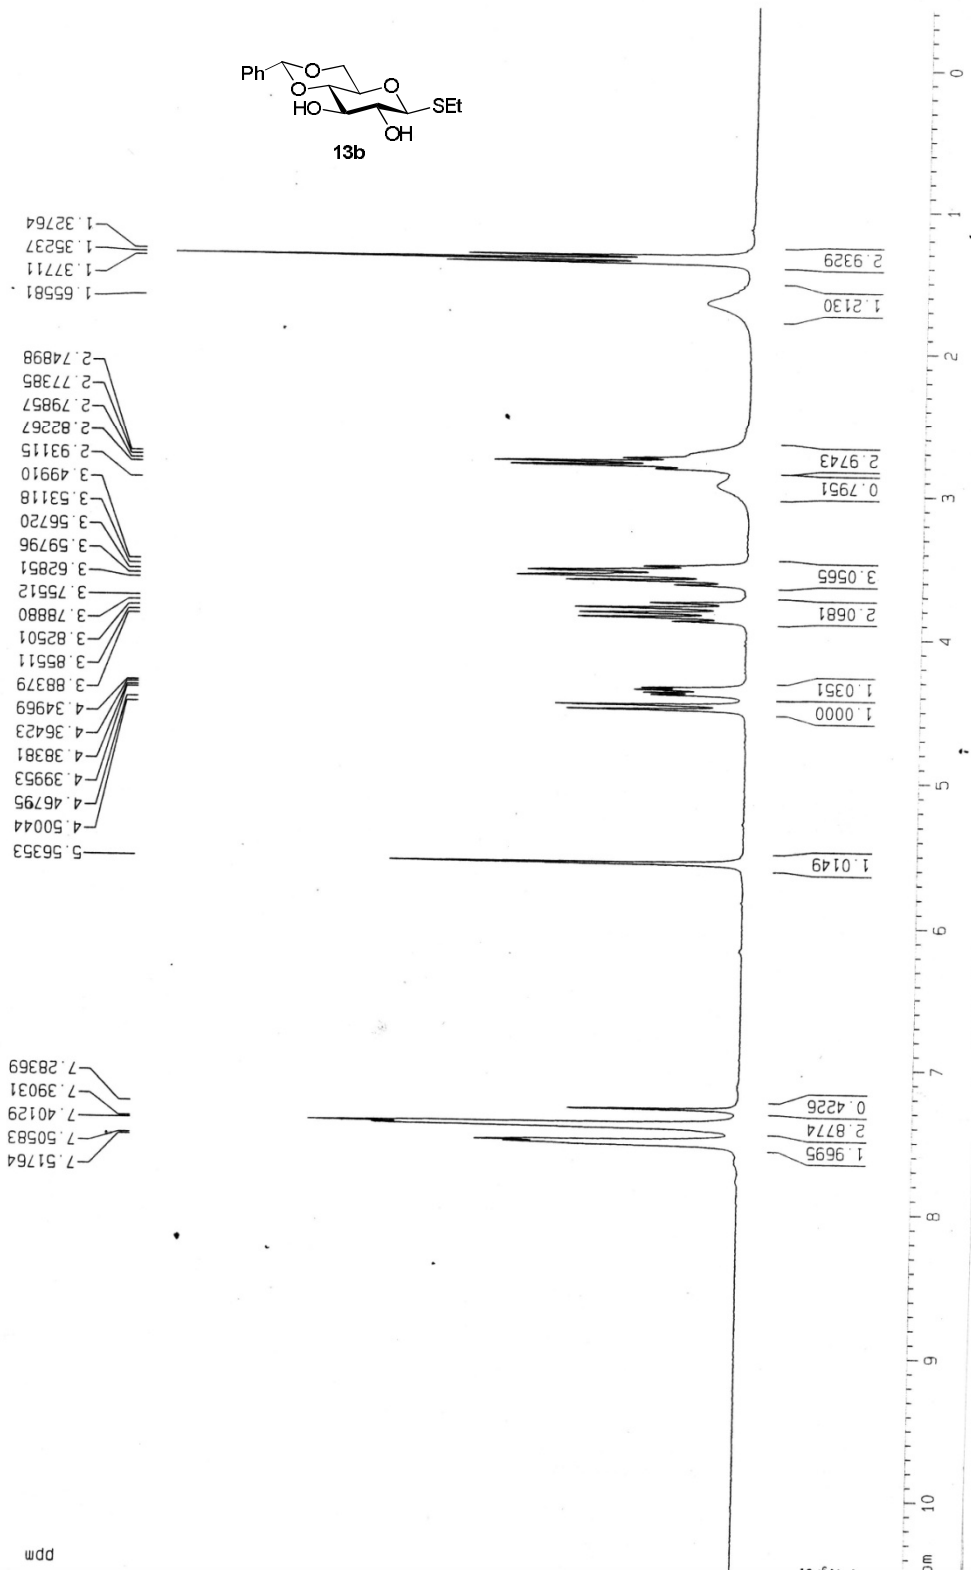

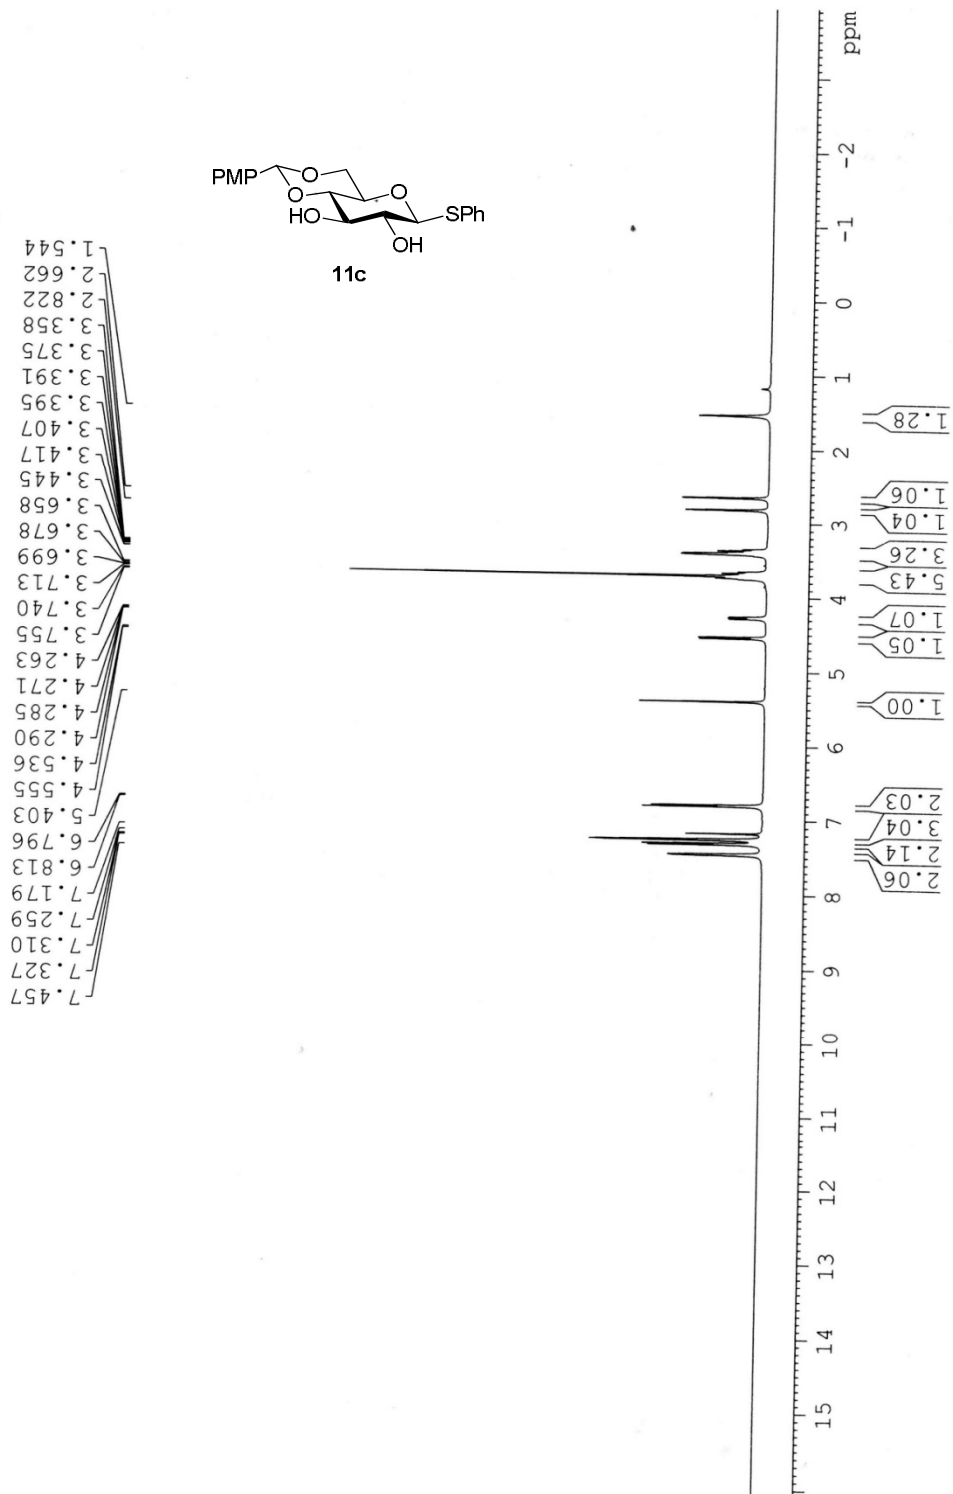

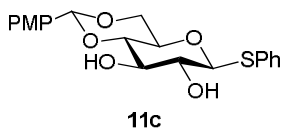

55.33  
68.56  
70.57  
72.59  
74.60  
76.78  
77.04  
77.29  
80.17  
88.61  
101.89  
113.75  
127.63  
128.48  
129.15  
129.35  
131.34  
133.06

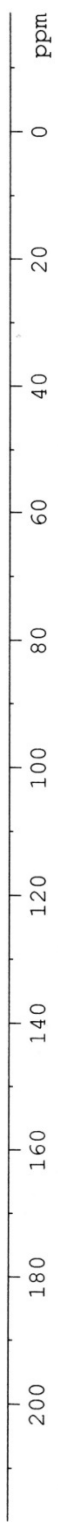

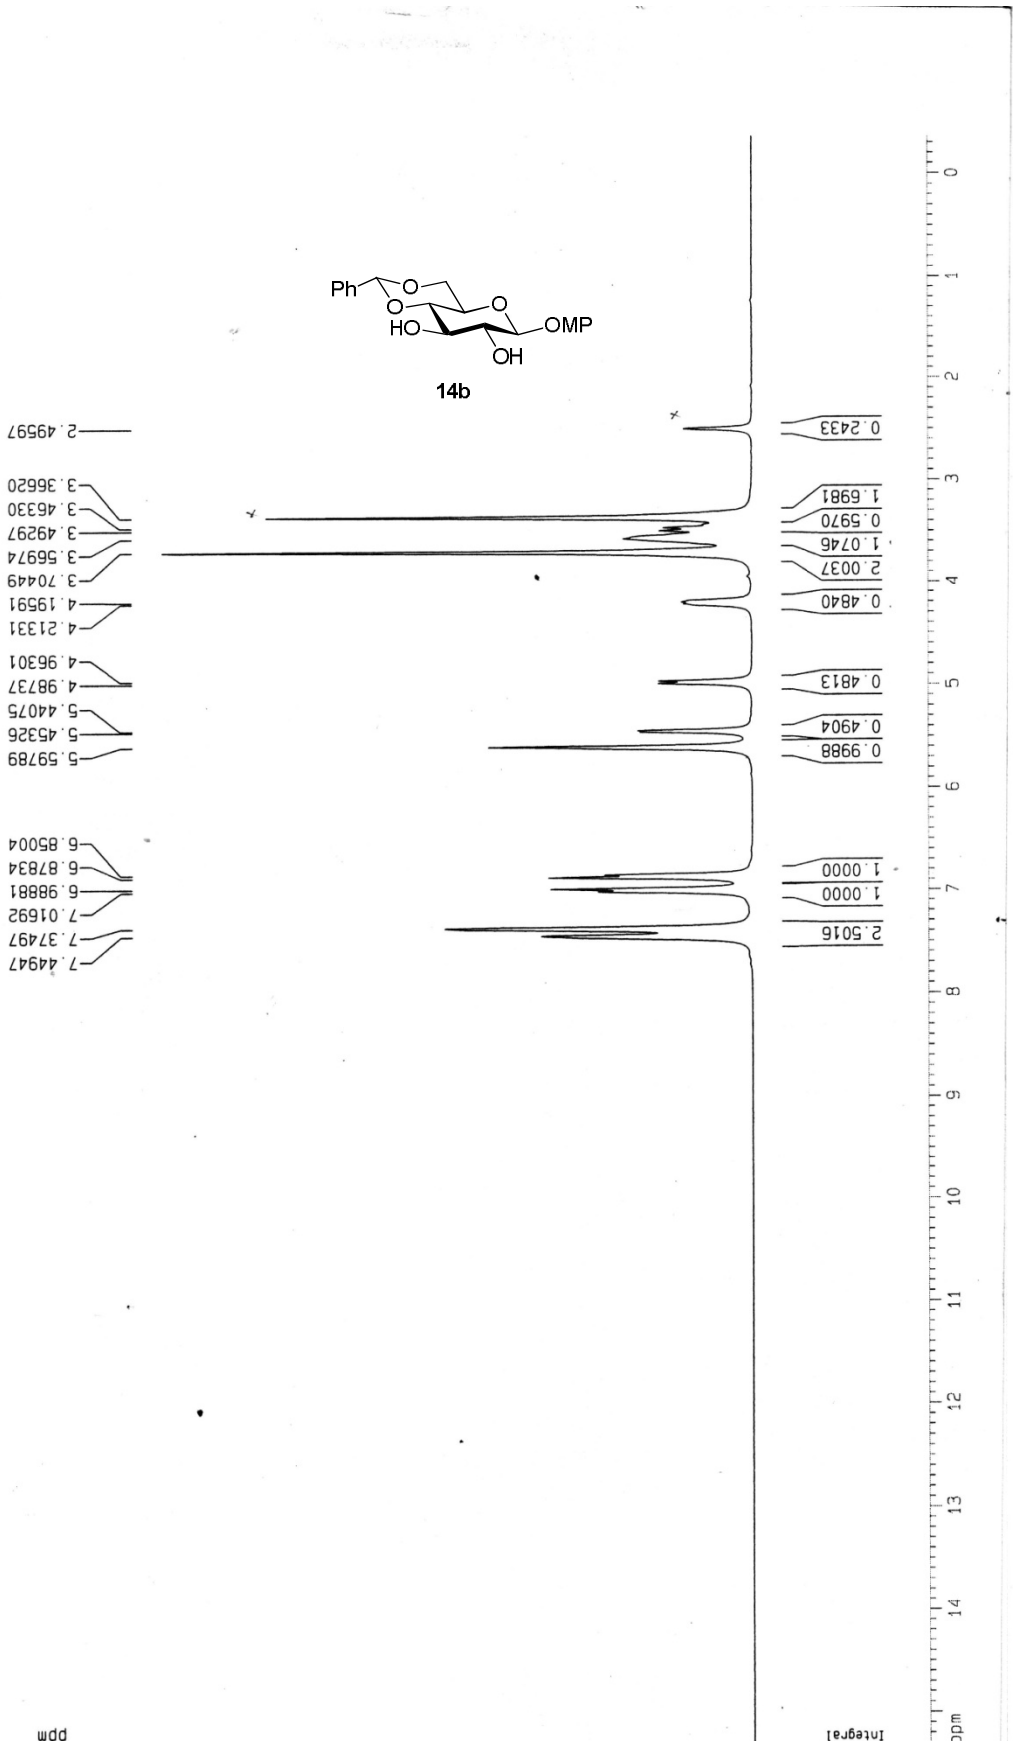

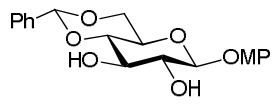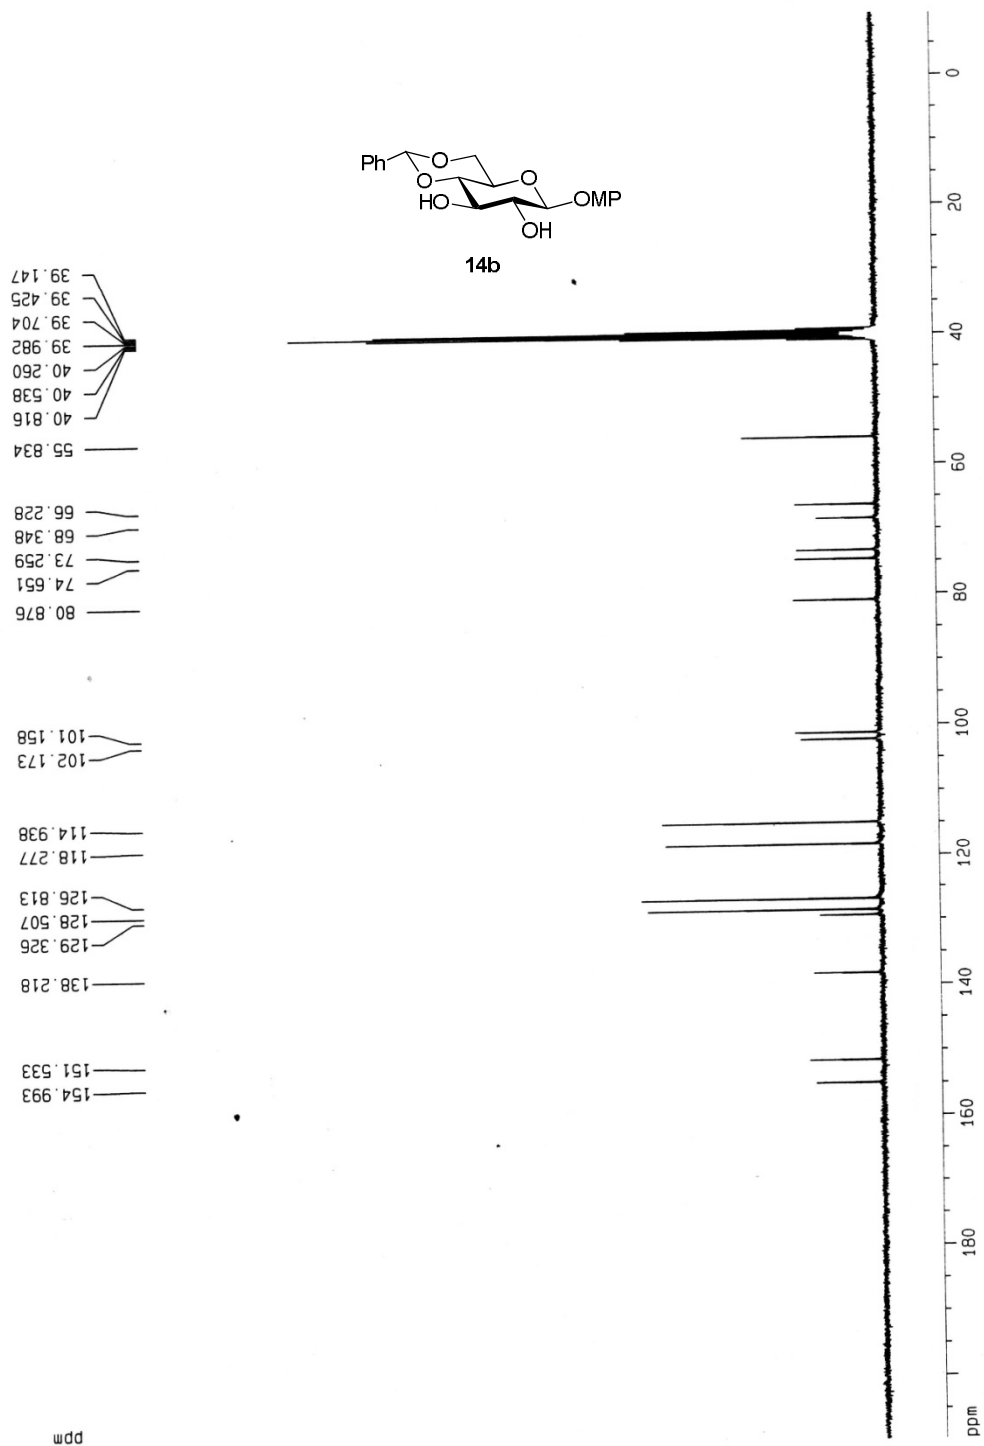

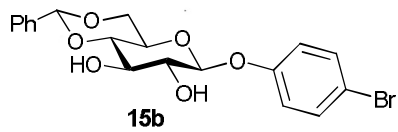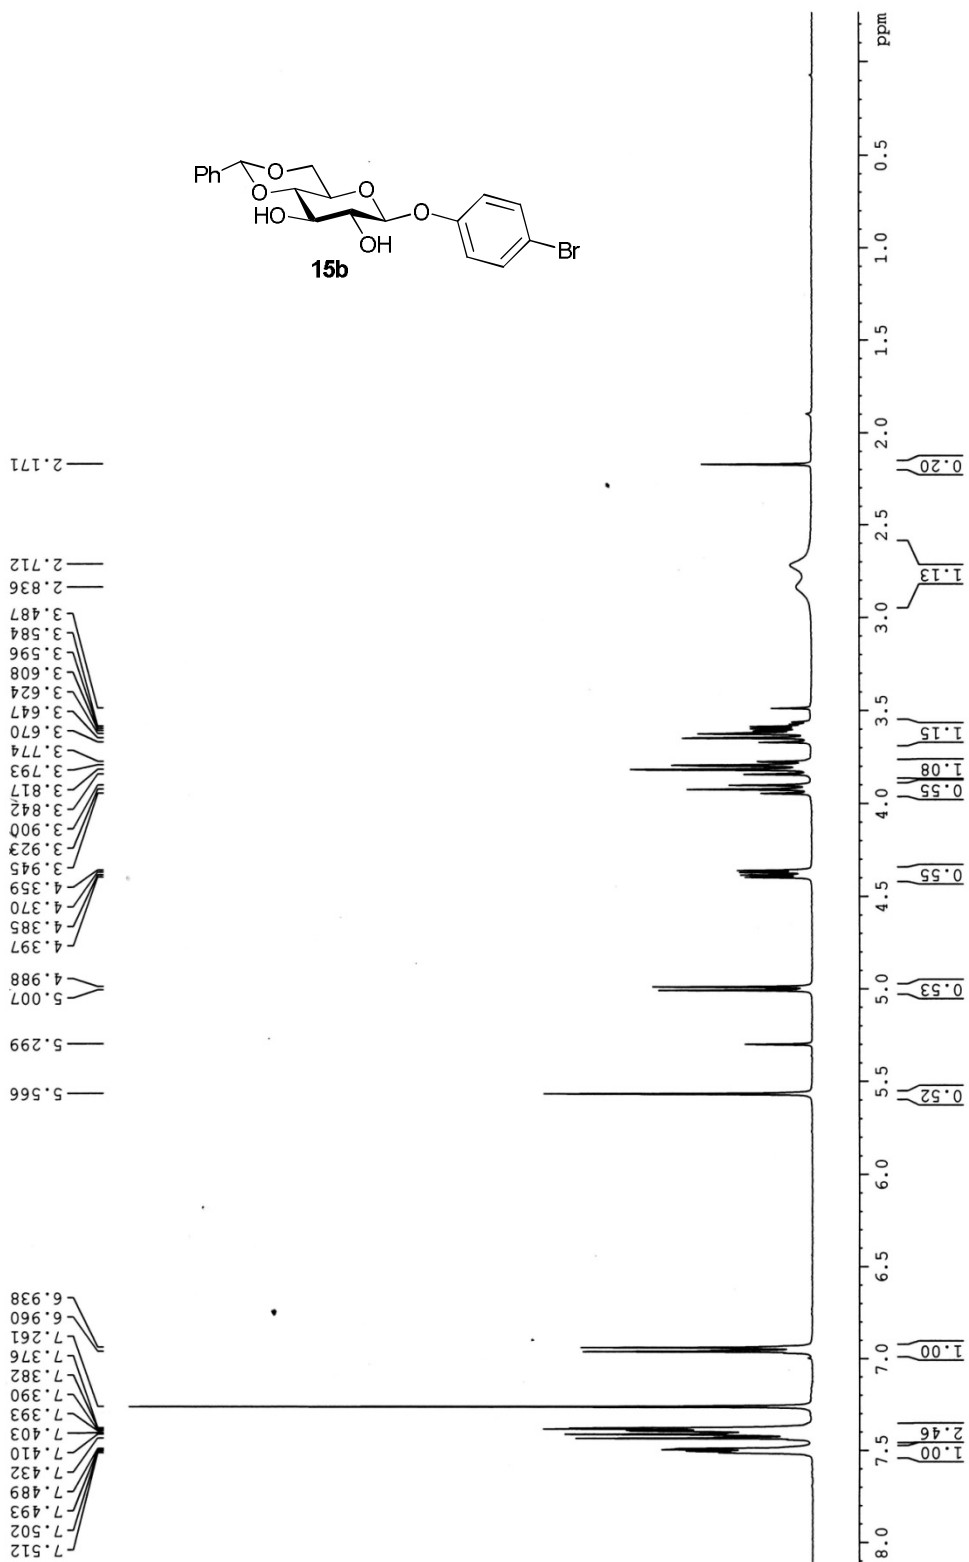

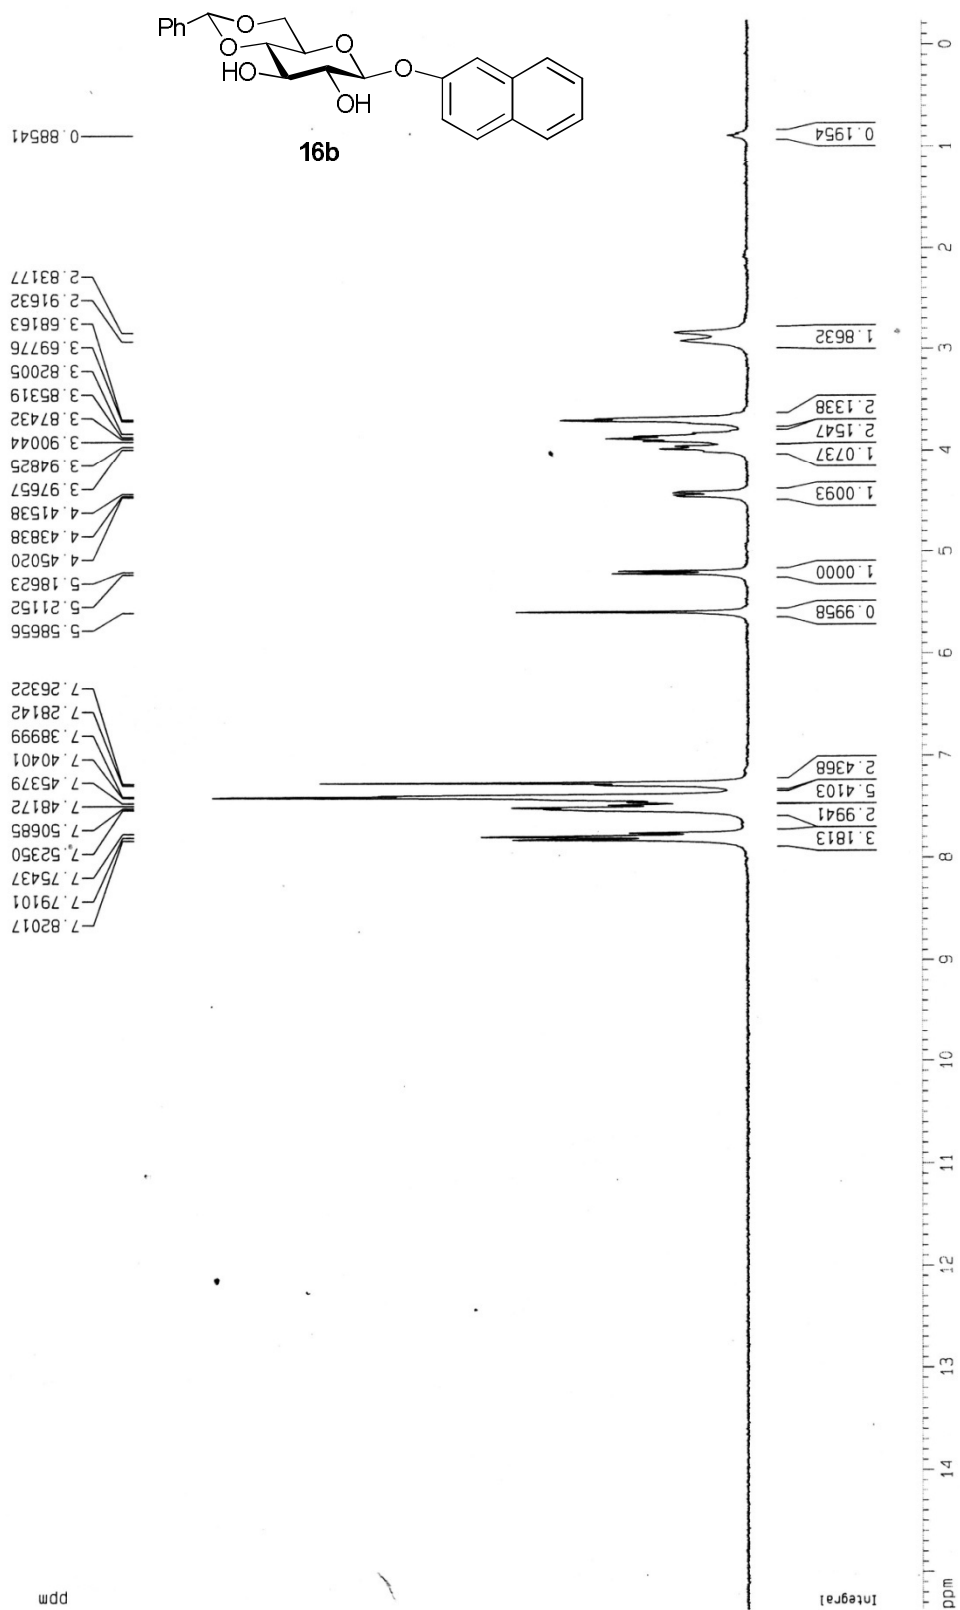

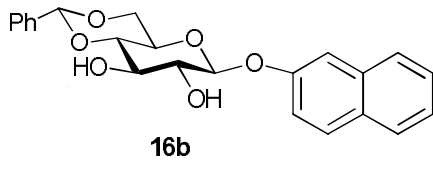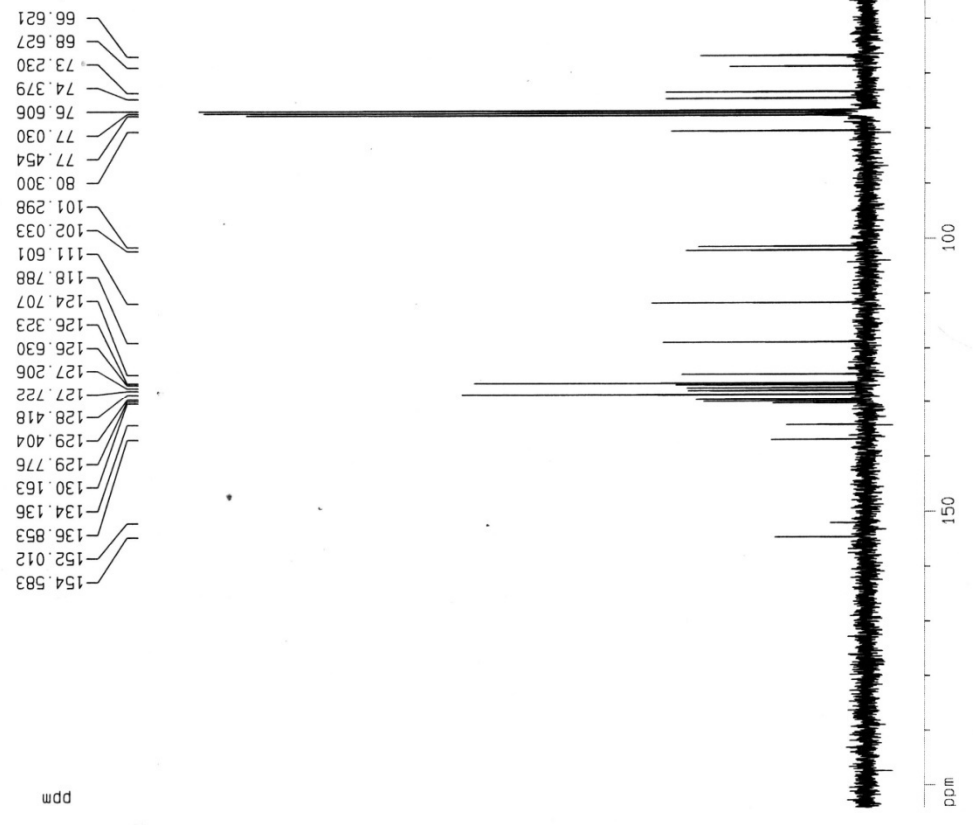



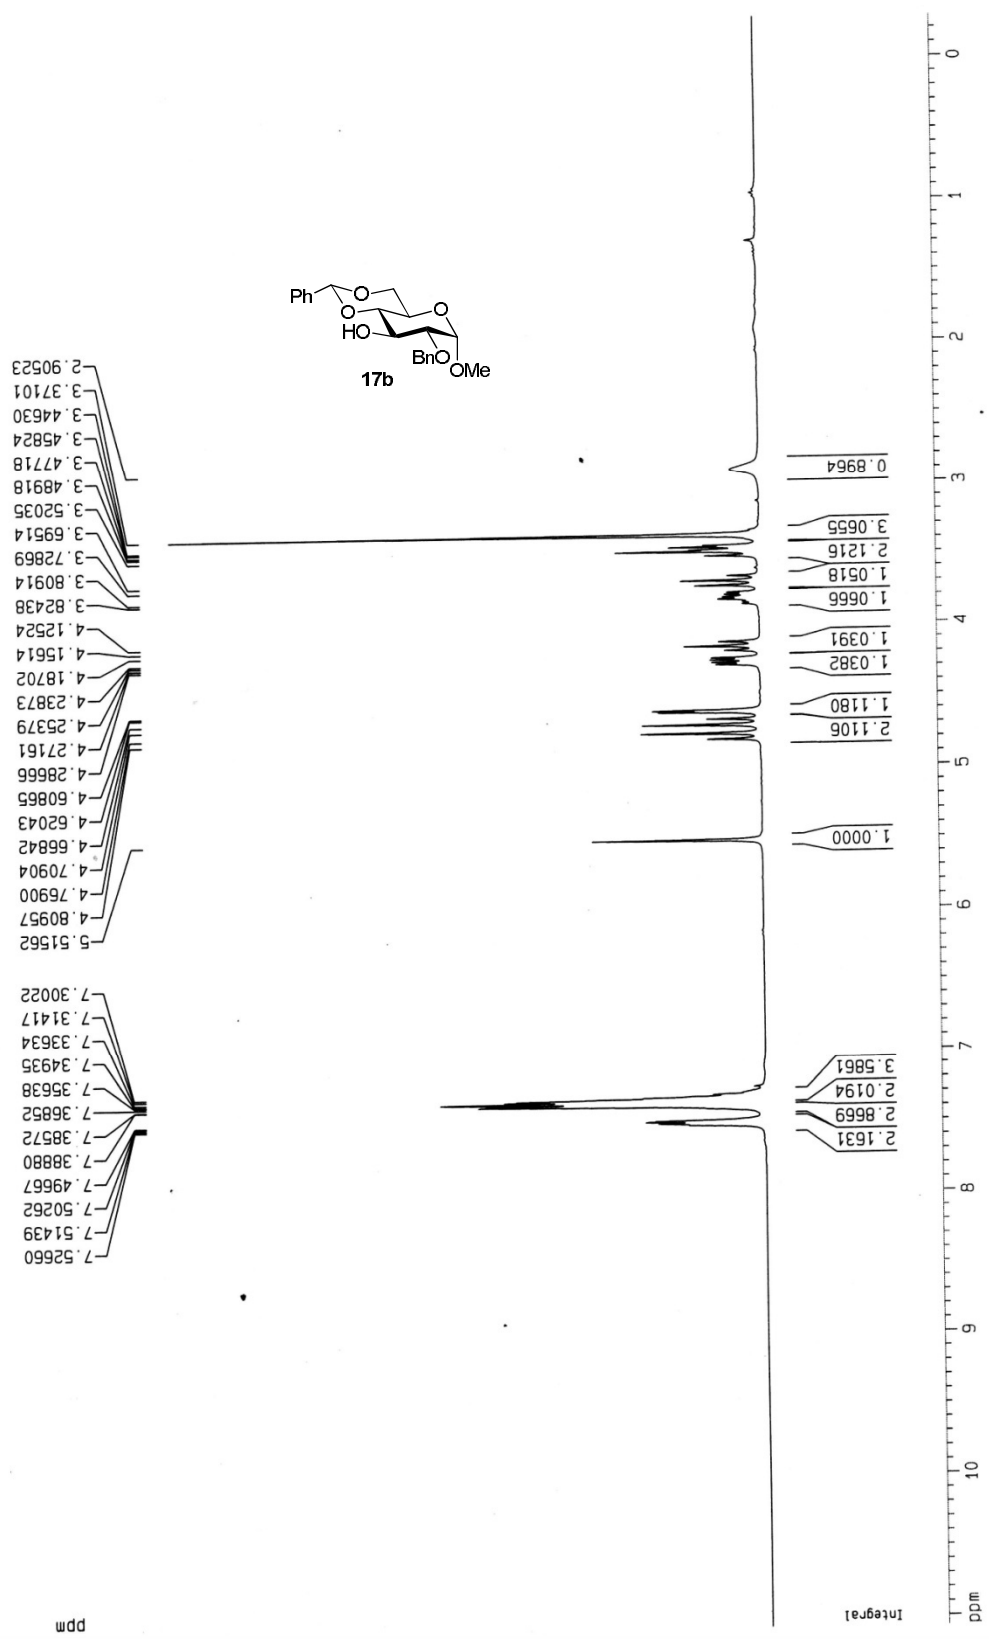

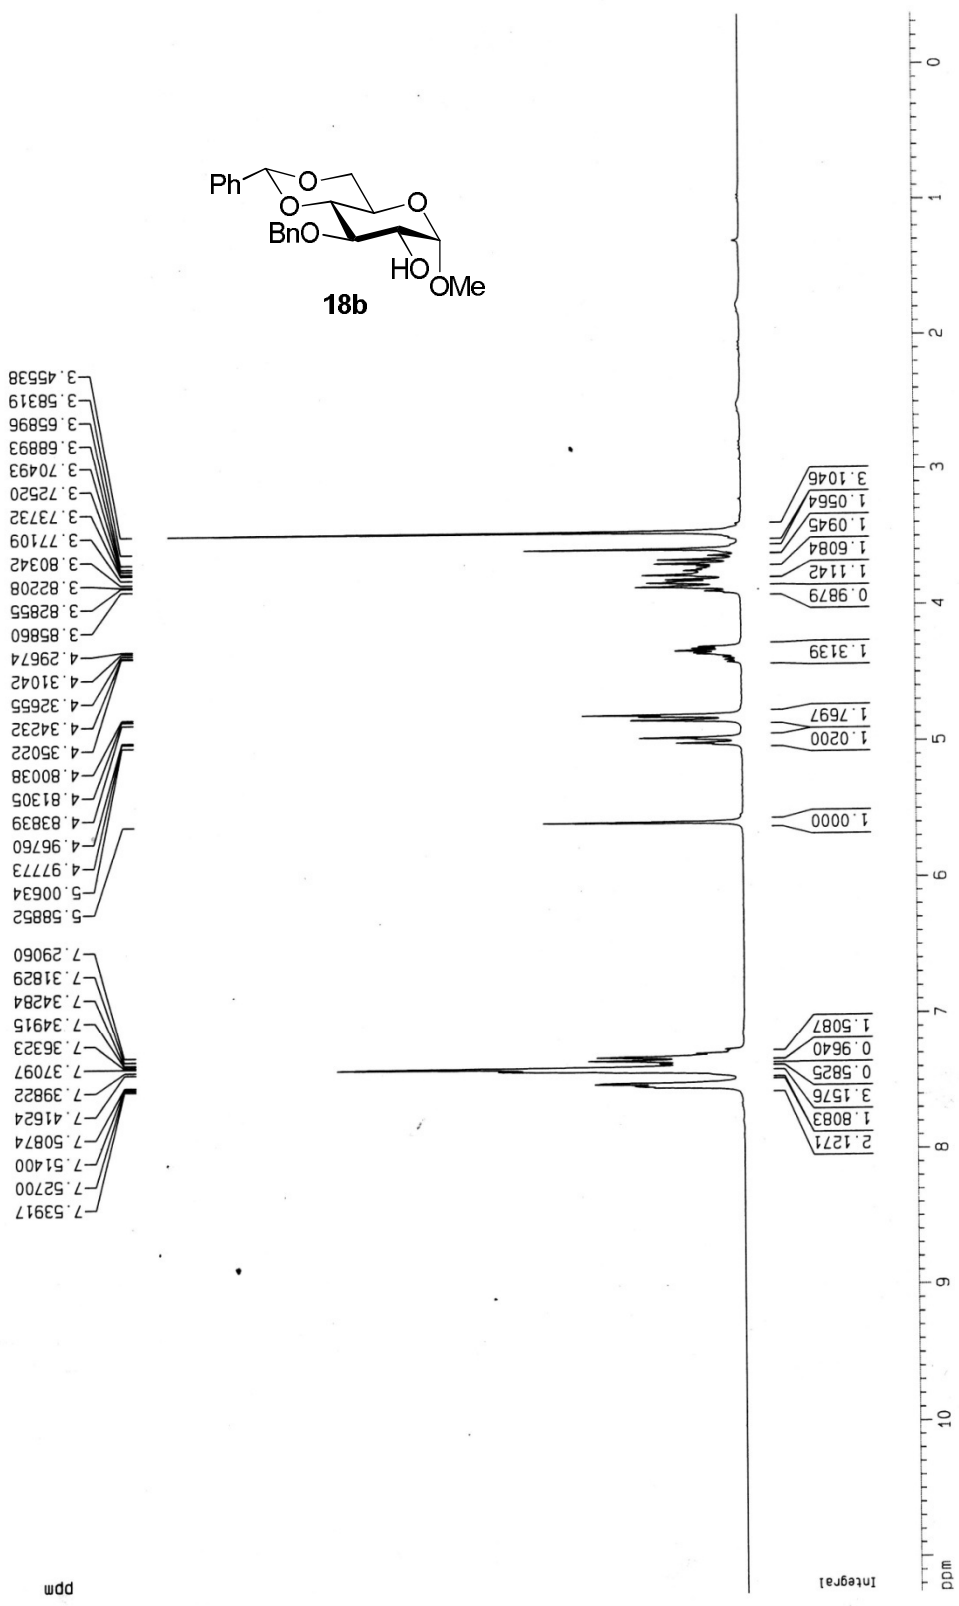

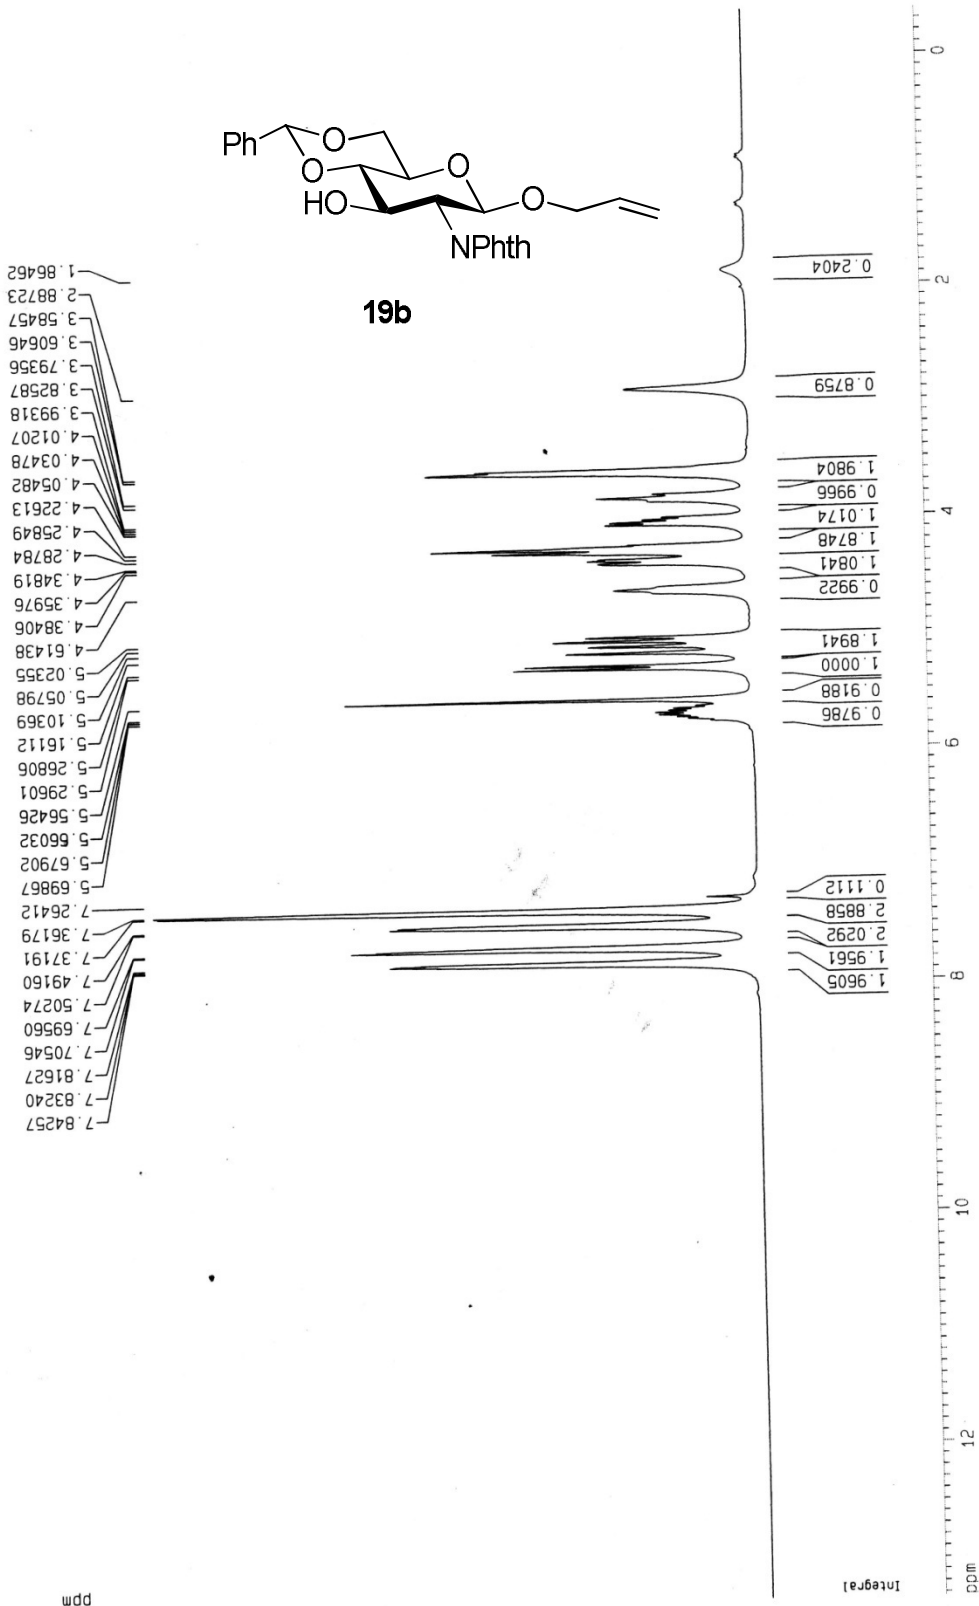

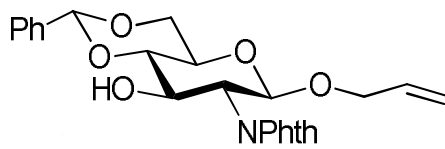

19b

- 56.658
- 66.168
- 68.553
- 68.691
- 70.145
- 76.683
- 77.107
- 77.531
- 82.221
- 98.007
- 101.913
- 117.642
- 123.507
- 126.361
- 128.379
- 129.337
- 131.646
- 133.381
- 134.148
- 137.060

168.202

ppm

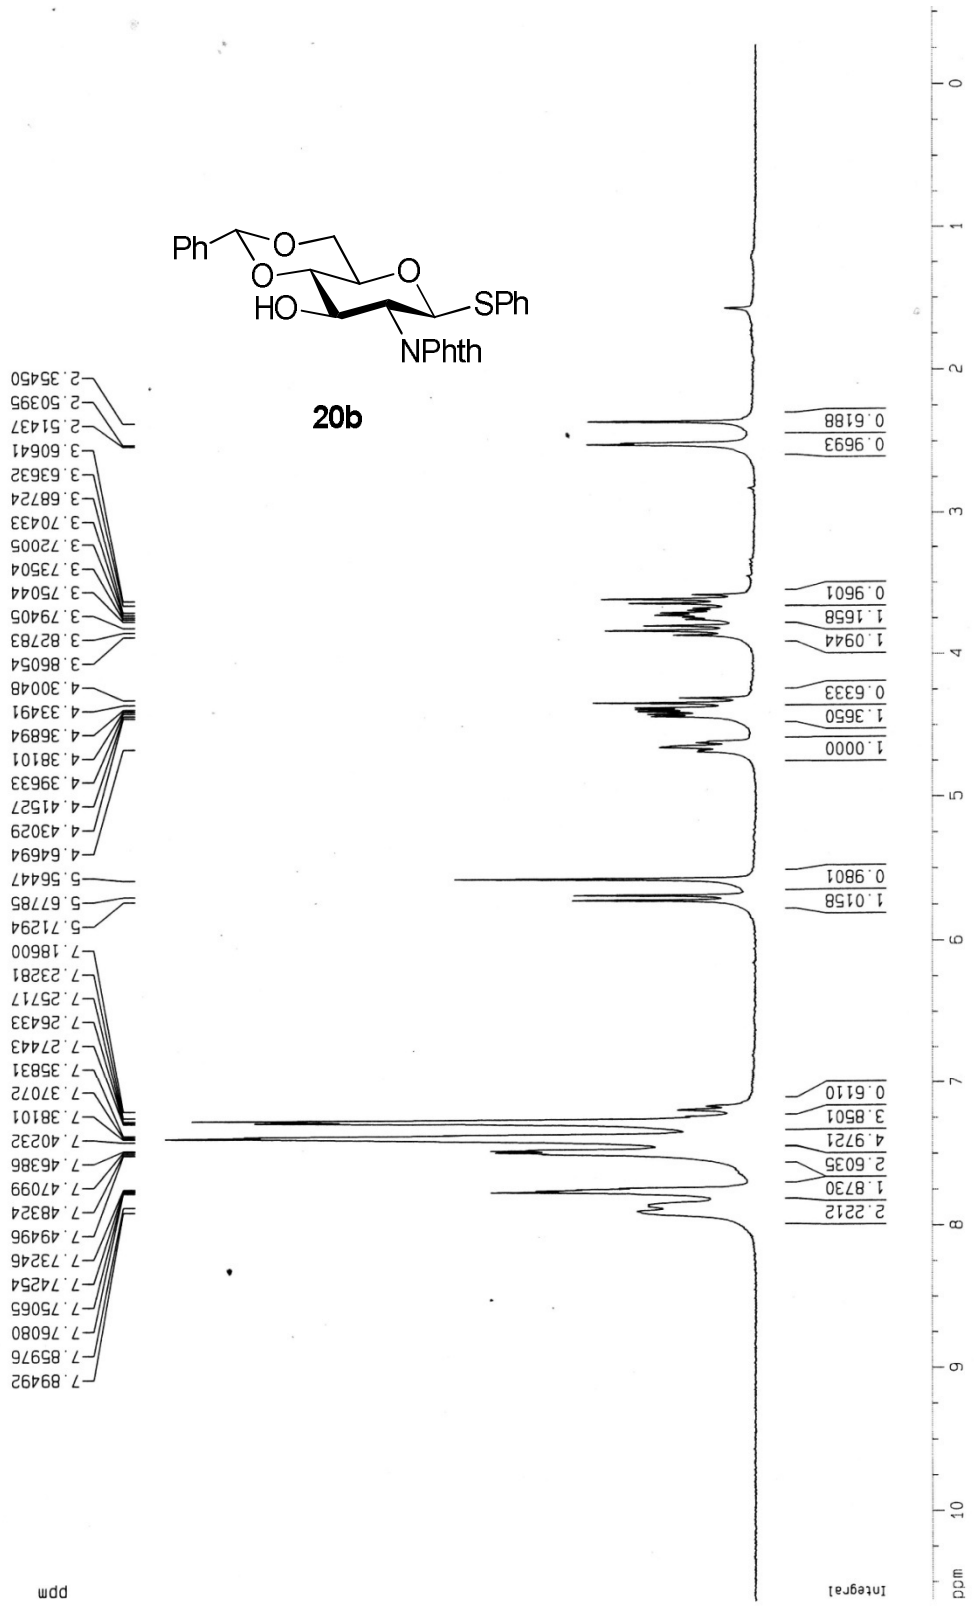

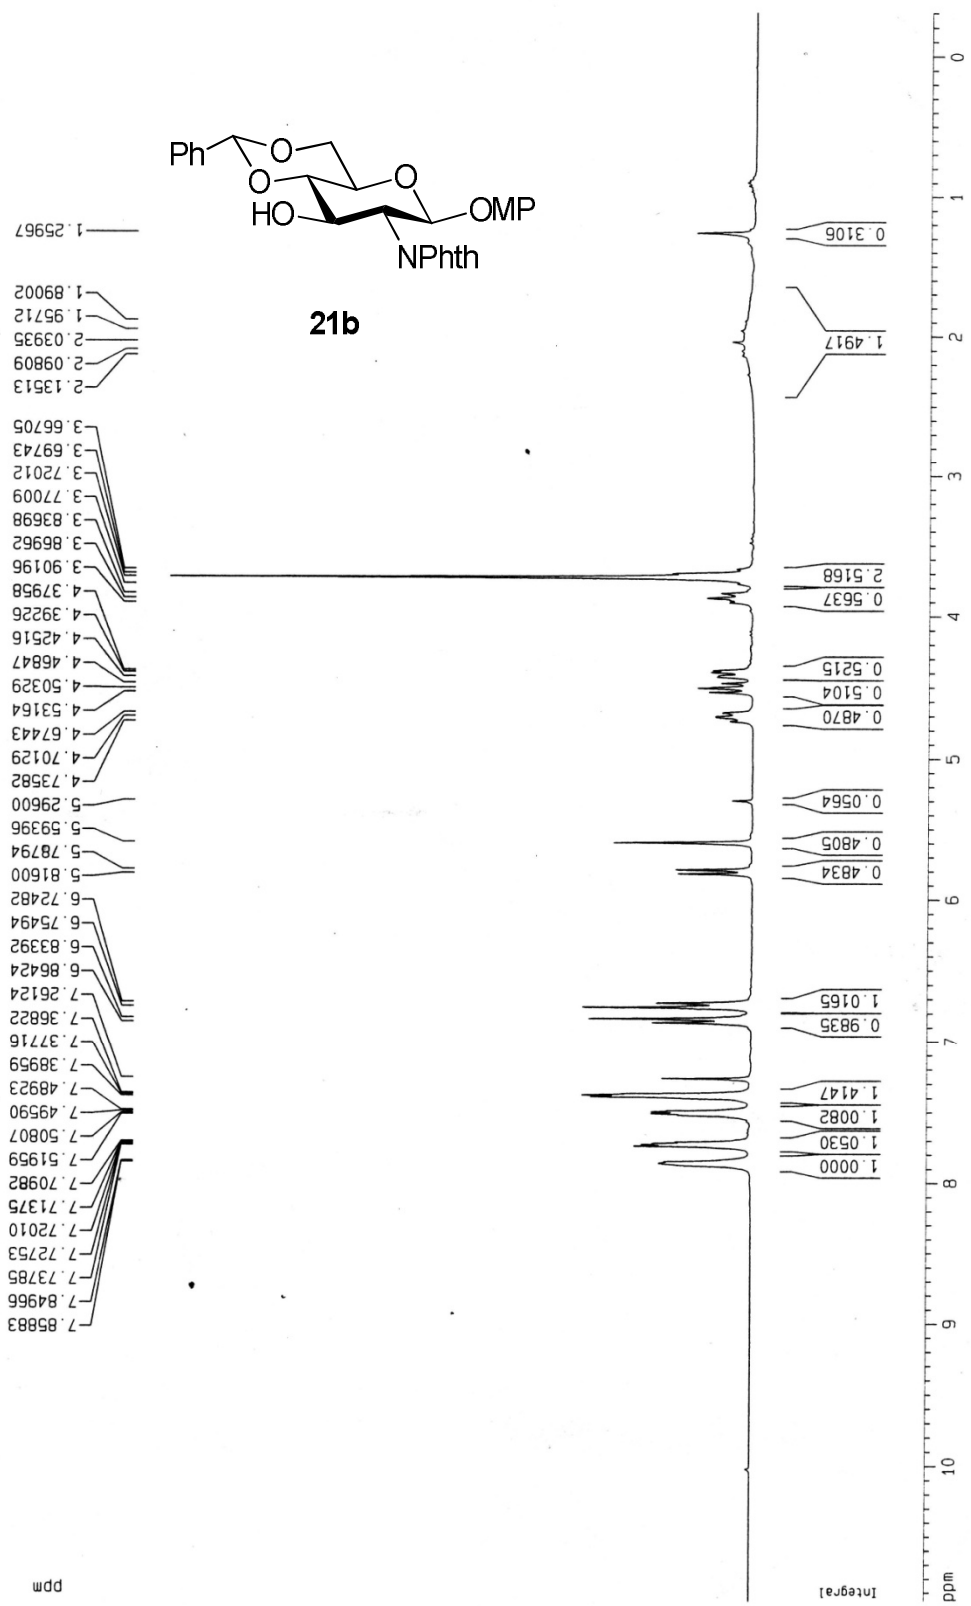

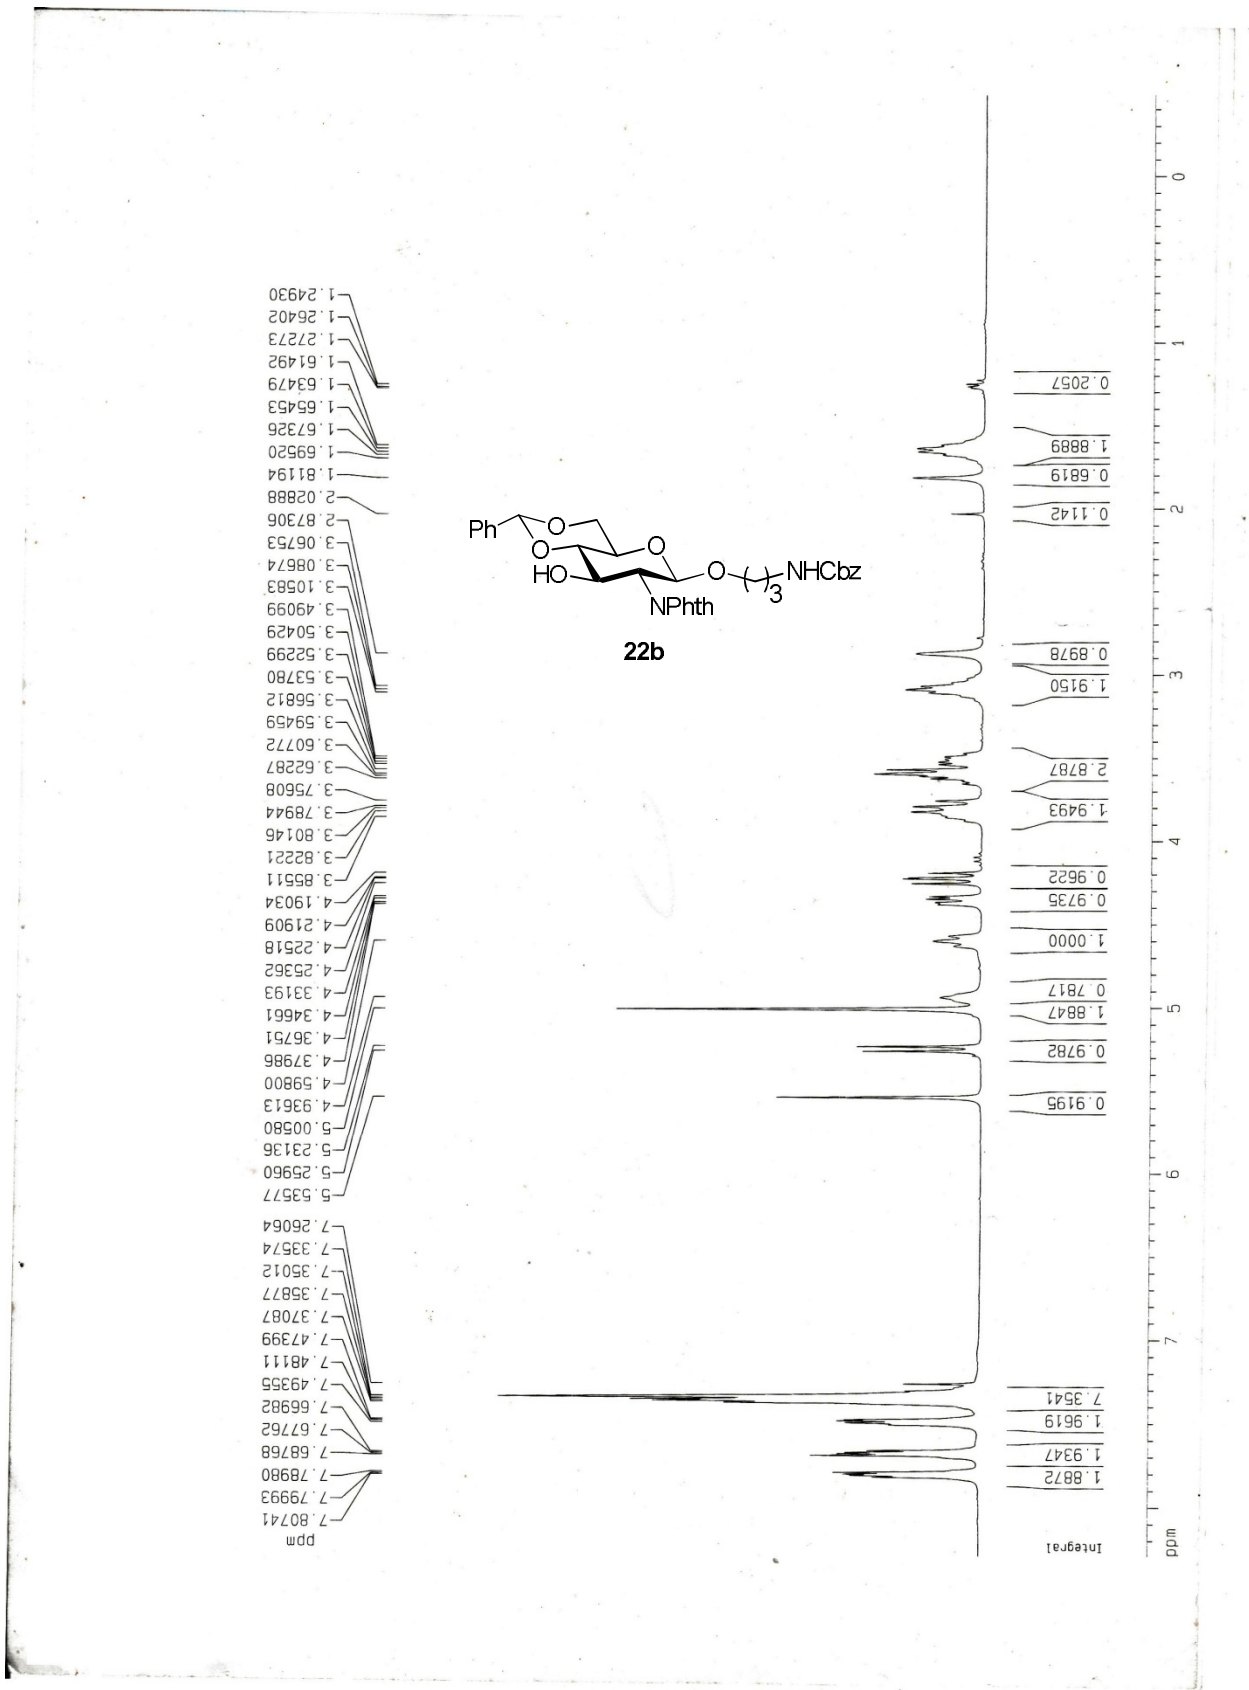

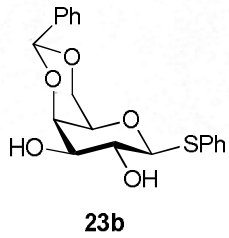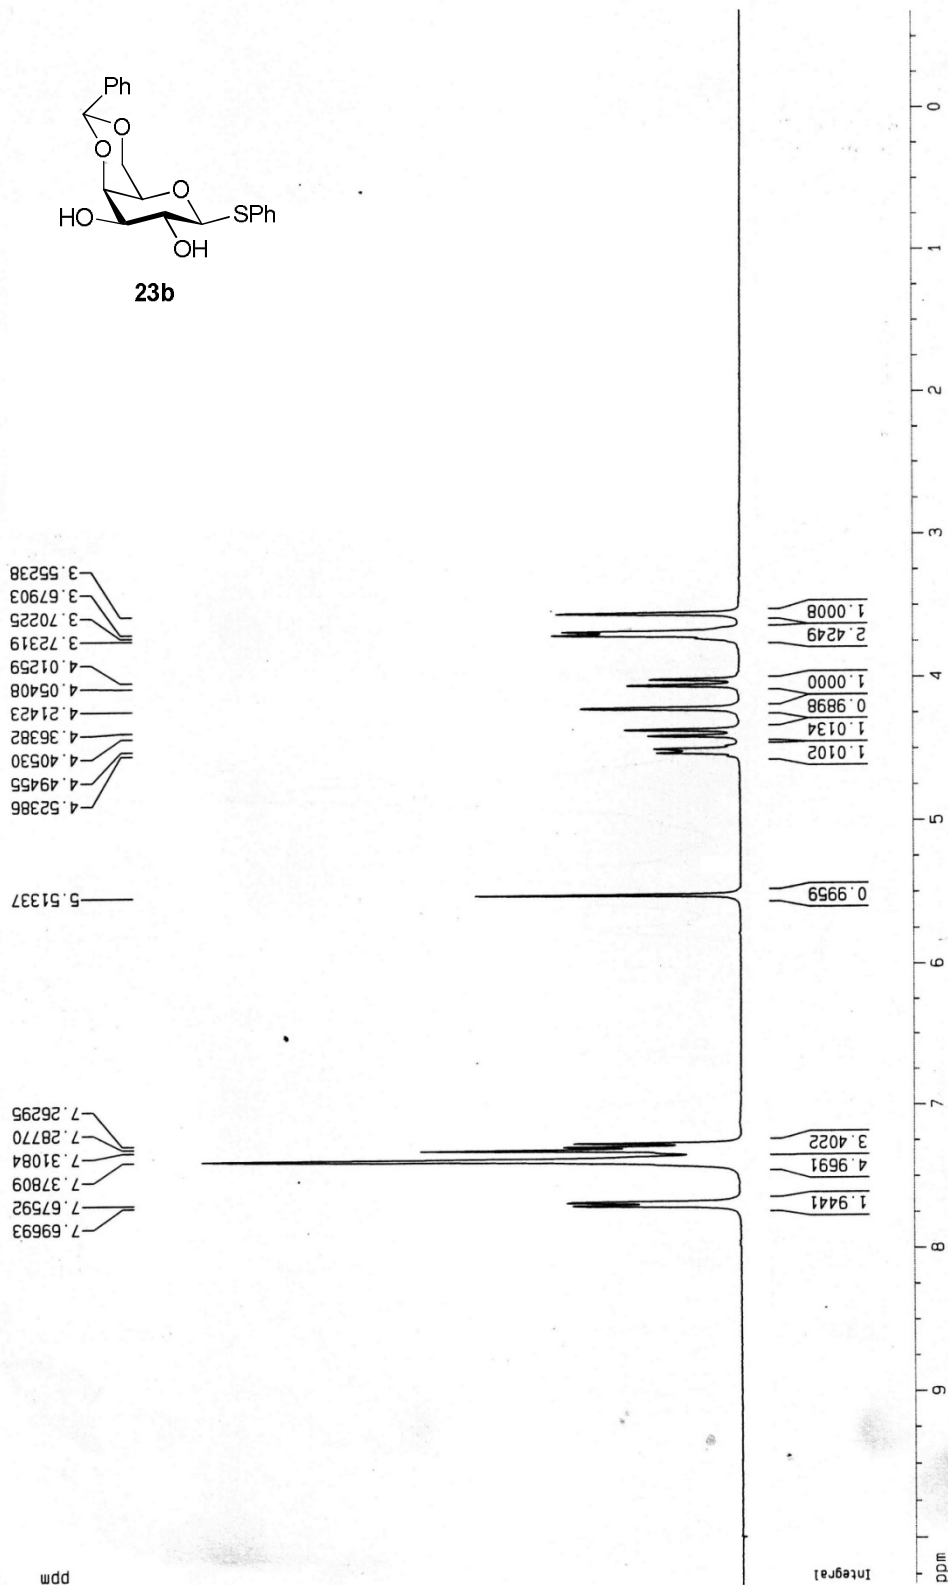



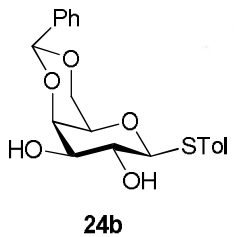

2.35925  
 2.95972  
 3.43756  
 3.63468  
 3.64330  
 3.65296  
 3.94657  
 3.98794  
 4.12570  
 4.31282  
 4.35422  
 4.41877  
 4.43547  
 4.44851

5.47229

7.09387  
 7.11931  
 7.28527  
 7.37465  
 7.39783  
 7.56447  
 7.59088

ppm

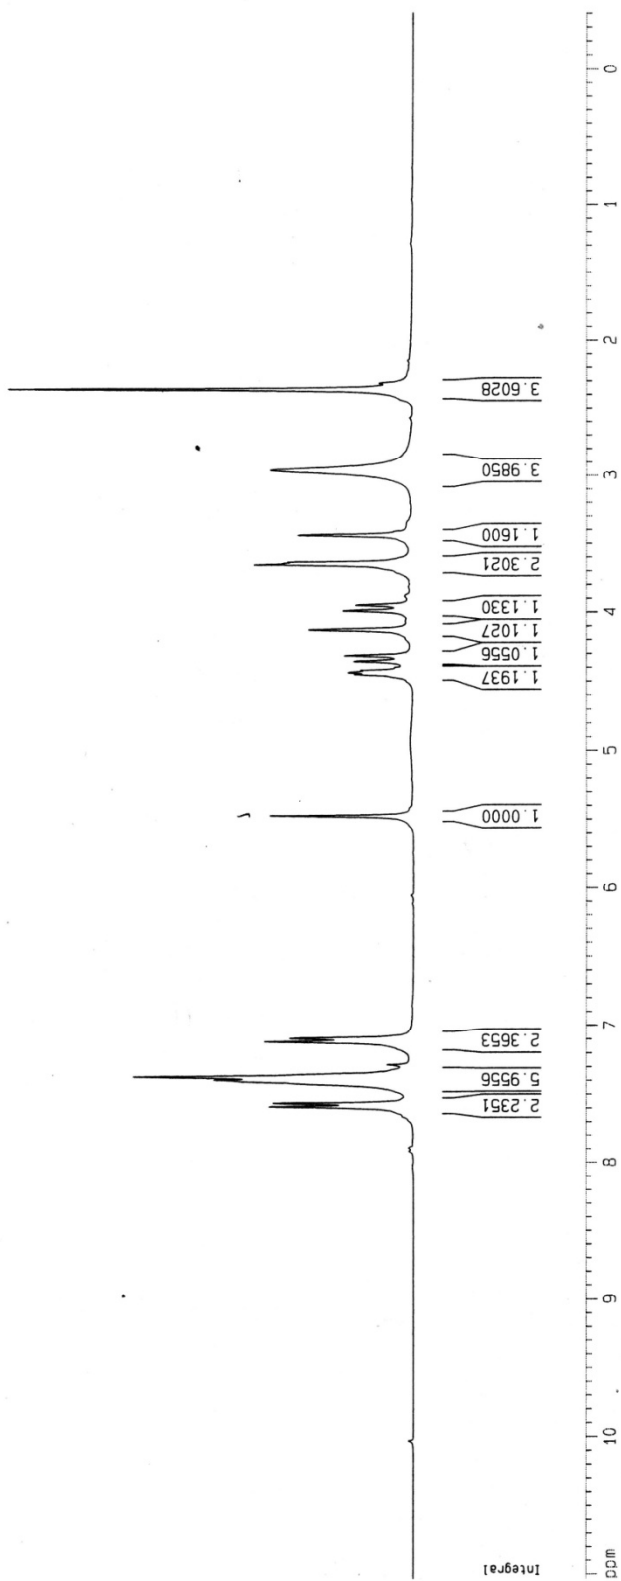

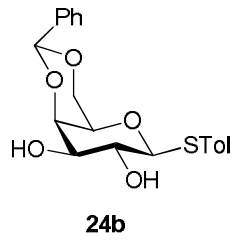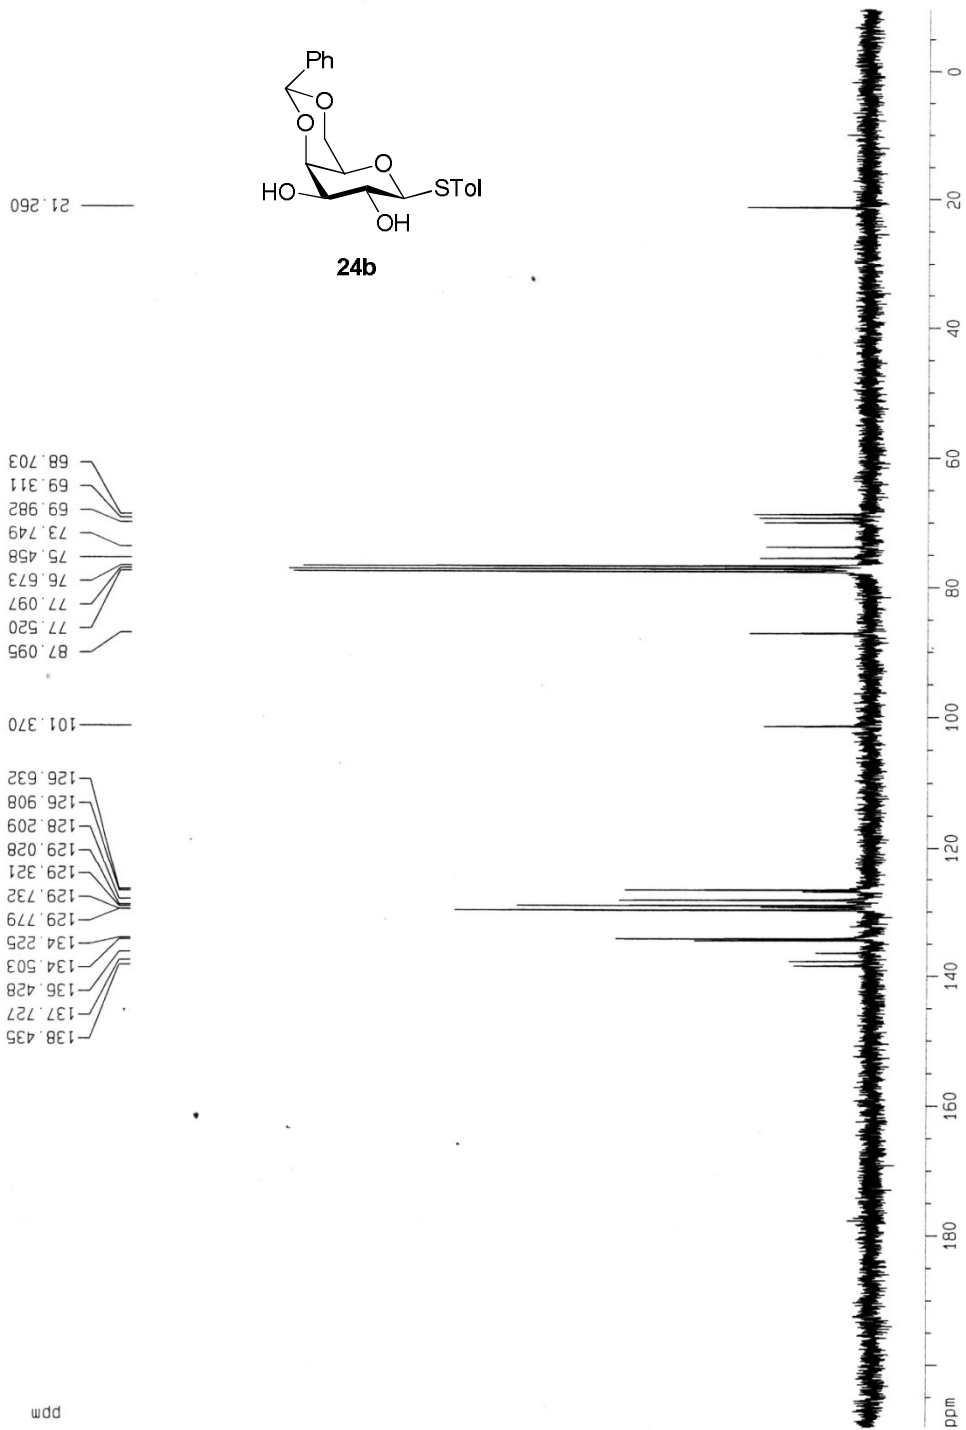

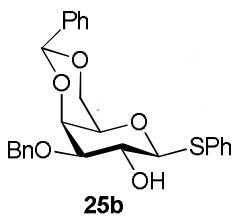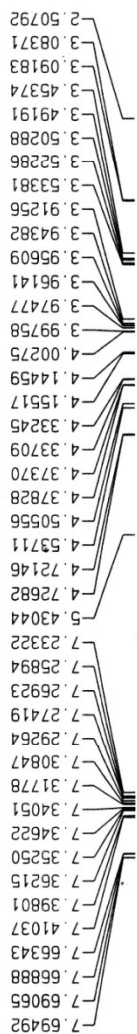

ppm

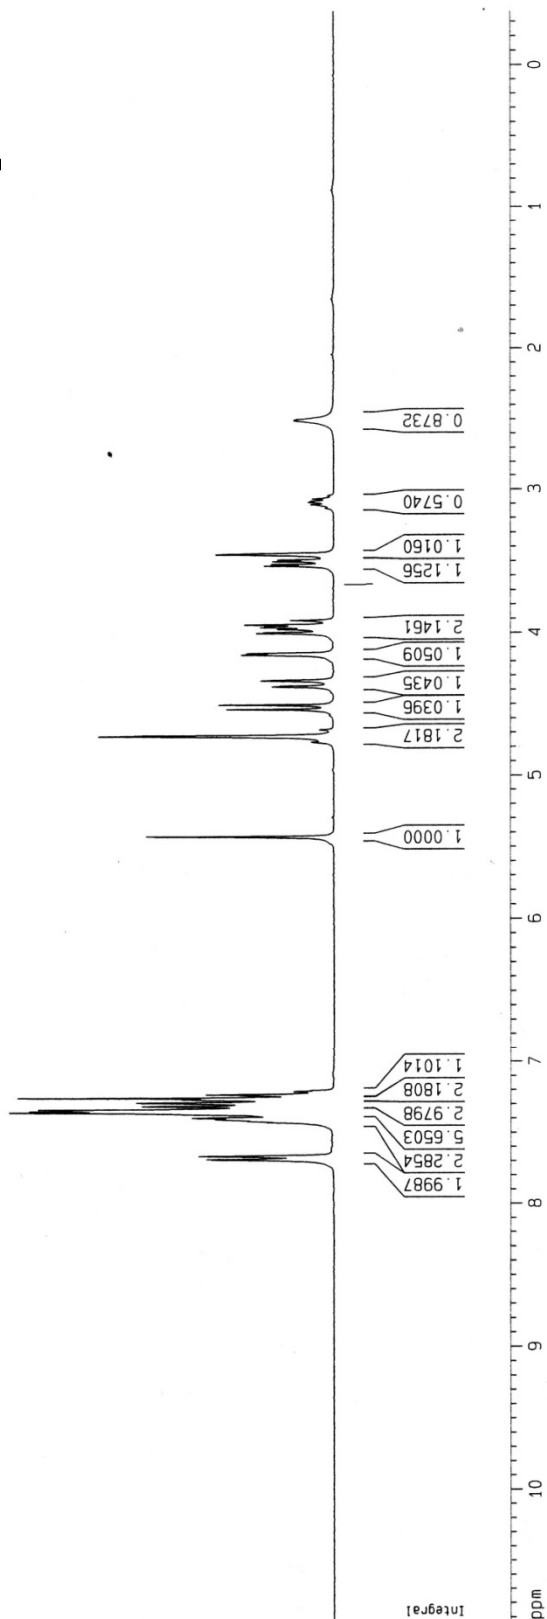

Integral

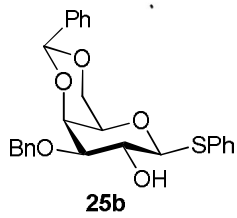

138.010  
137.876  
133.739  
132.571  
130.787  
129.773  
129.057  
128.911  
128.686  
128.495  
128.135  
128.090  
127.928  
126.551  
101.145  
87.130  
80.333  
77.512  
77.088  
76.665  
73.286  
71.664  
70.101  
69.416  
67.243

ppm

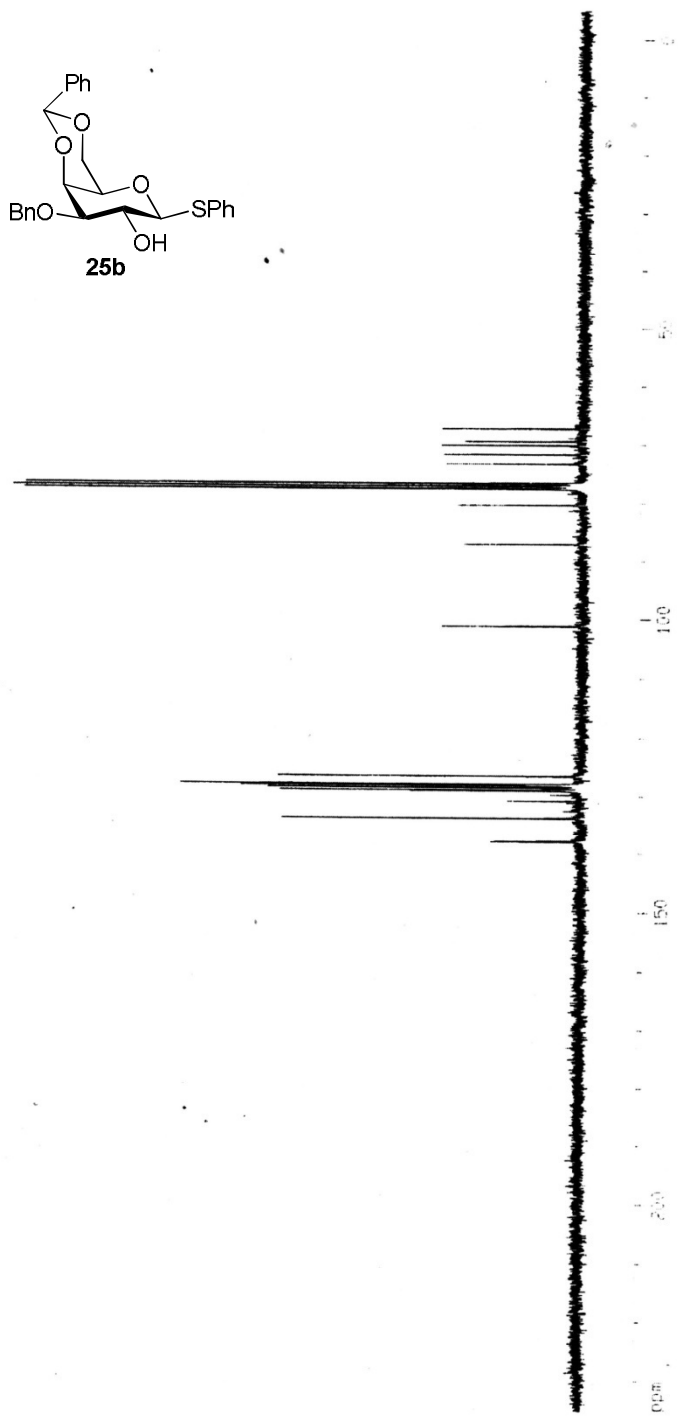

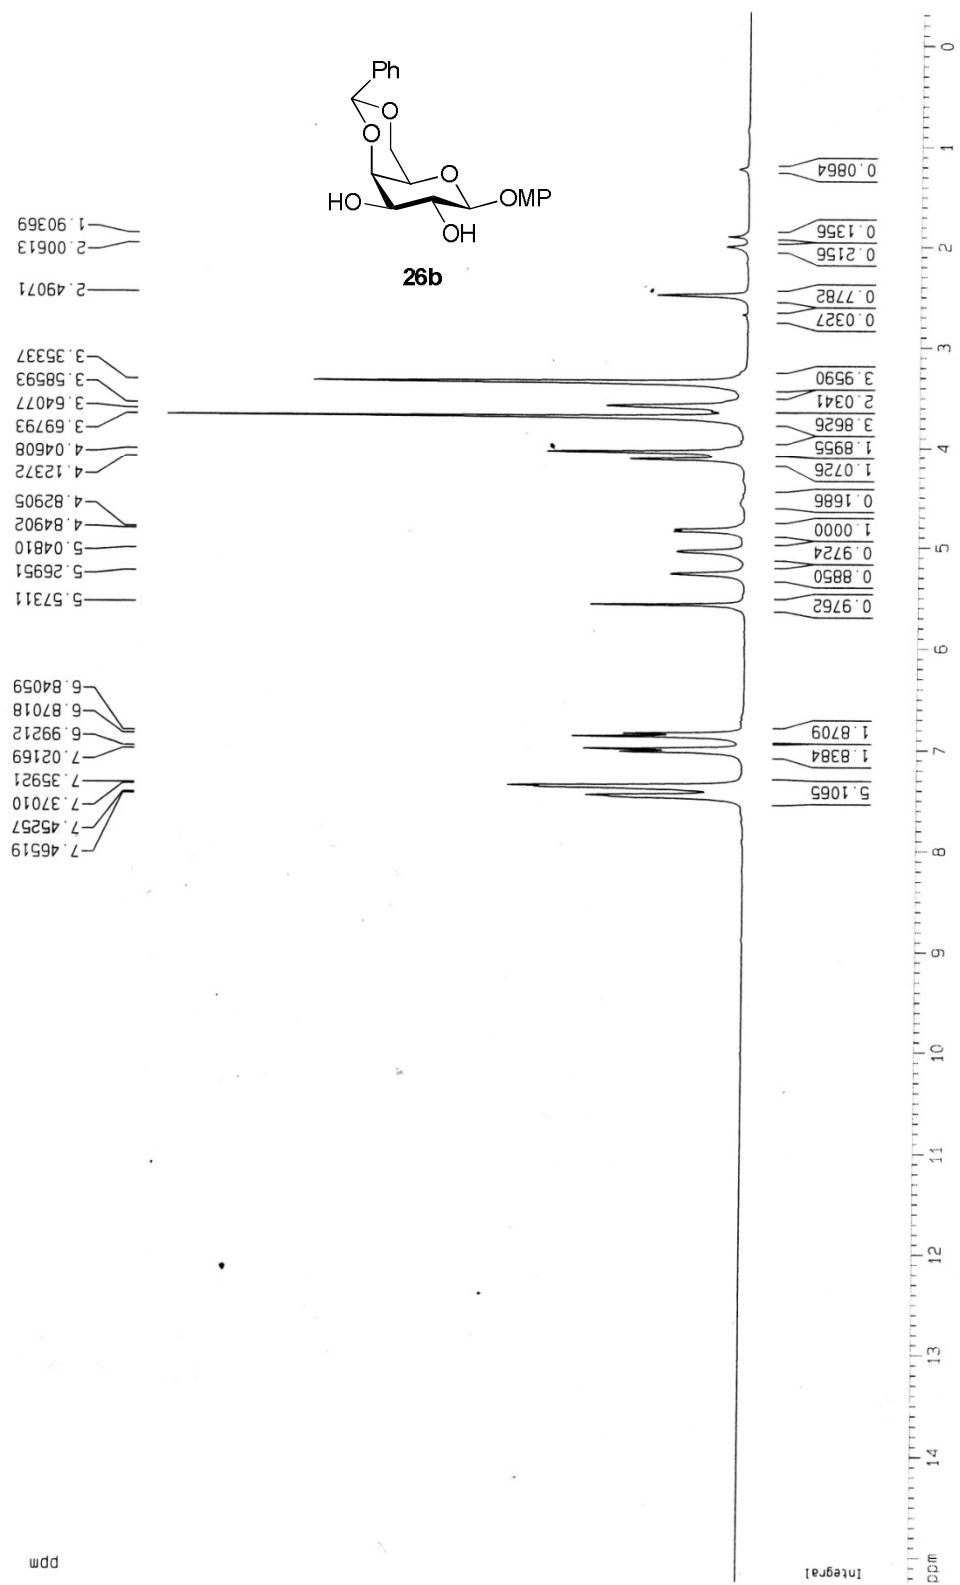

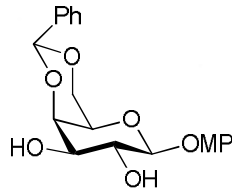

26b

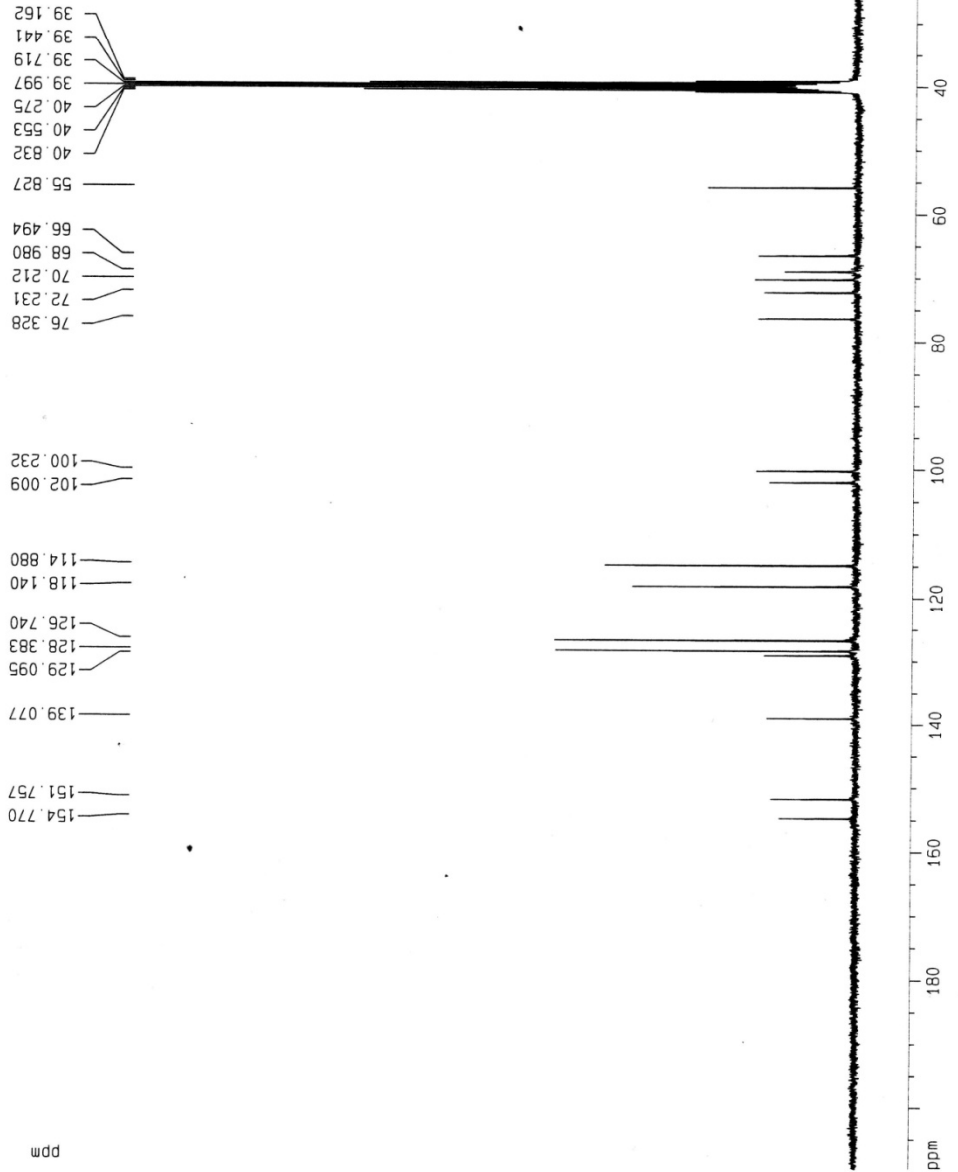

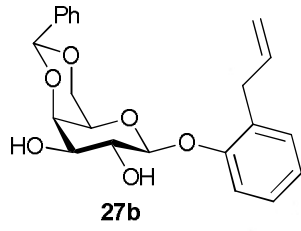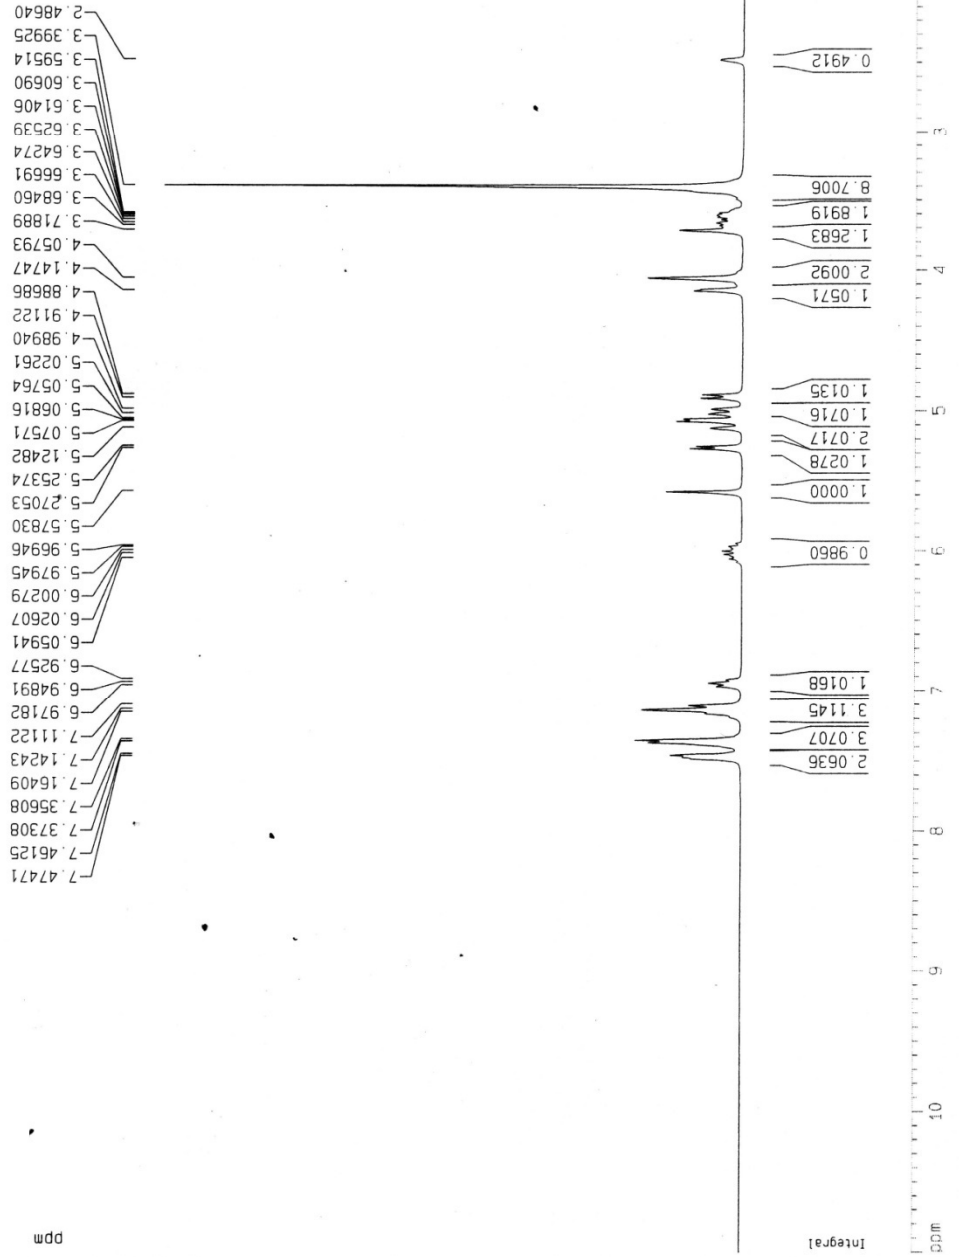

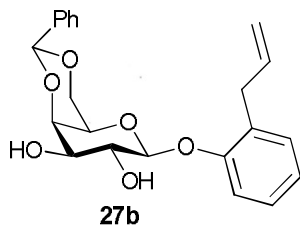

40.811  
40.532  
40.254  
39.976  
39.698  
39.420  
39.142  
34.276

76.337  
72.310  
70.361  
68.997  
66.553

101.877  
100.262

139.085  
137.680  
129.898  
129.671  
129.116  
128.404  
127.701  
126.739  
122.378  
116.148  
115.597

155.555

ppm

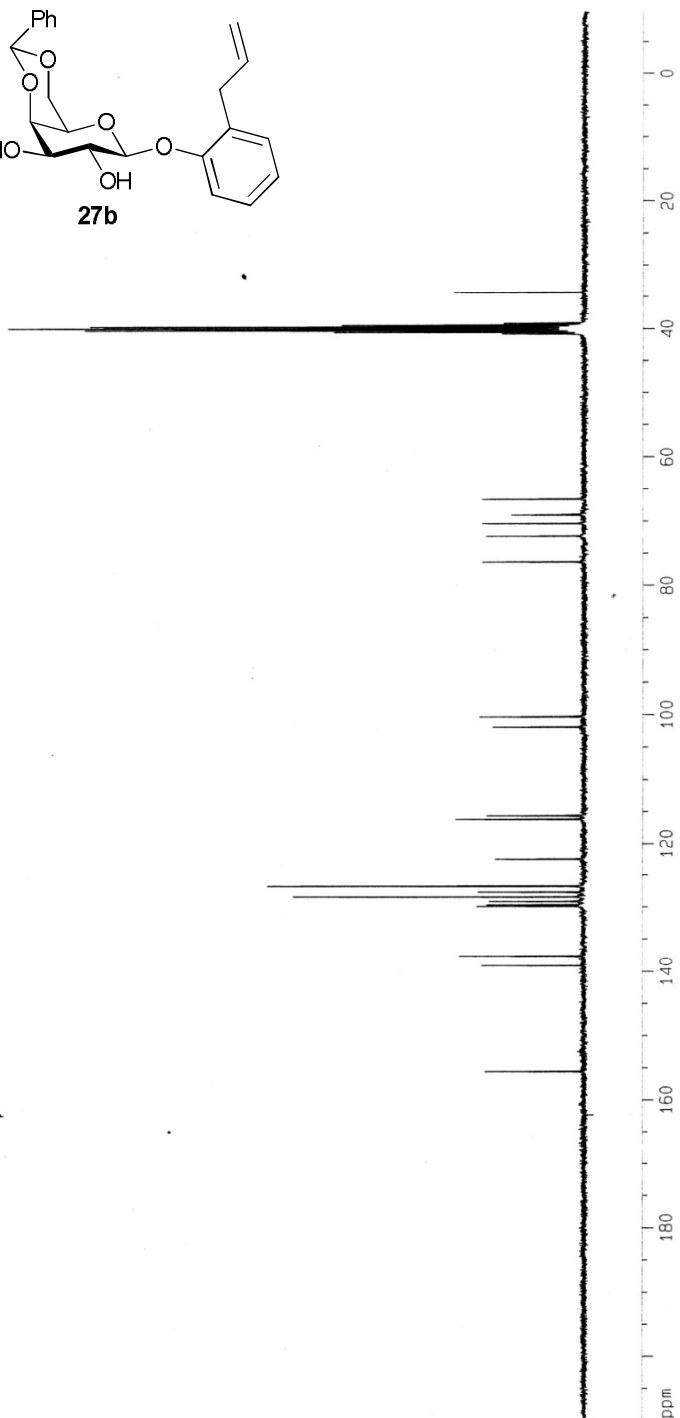



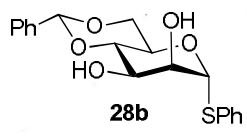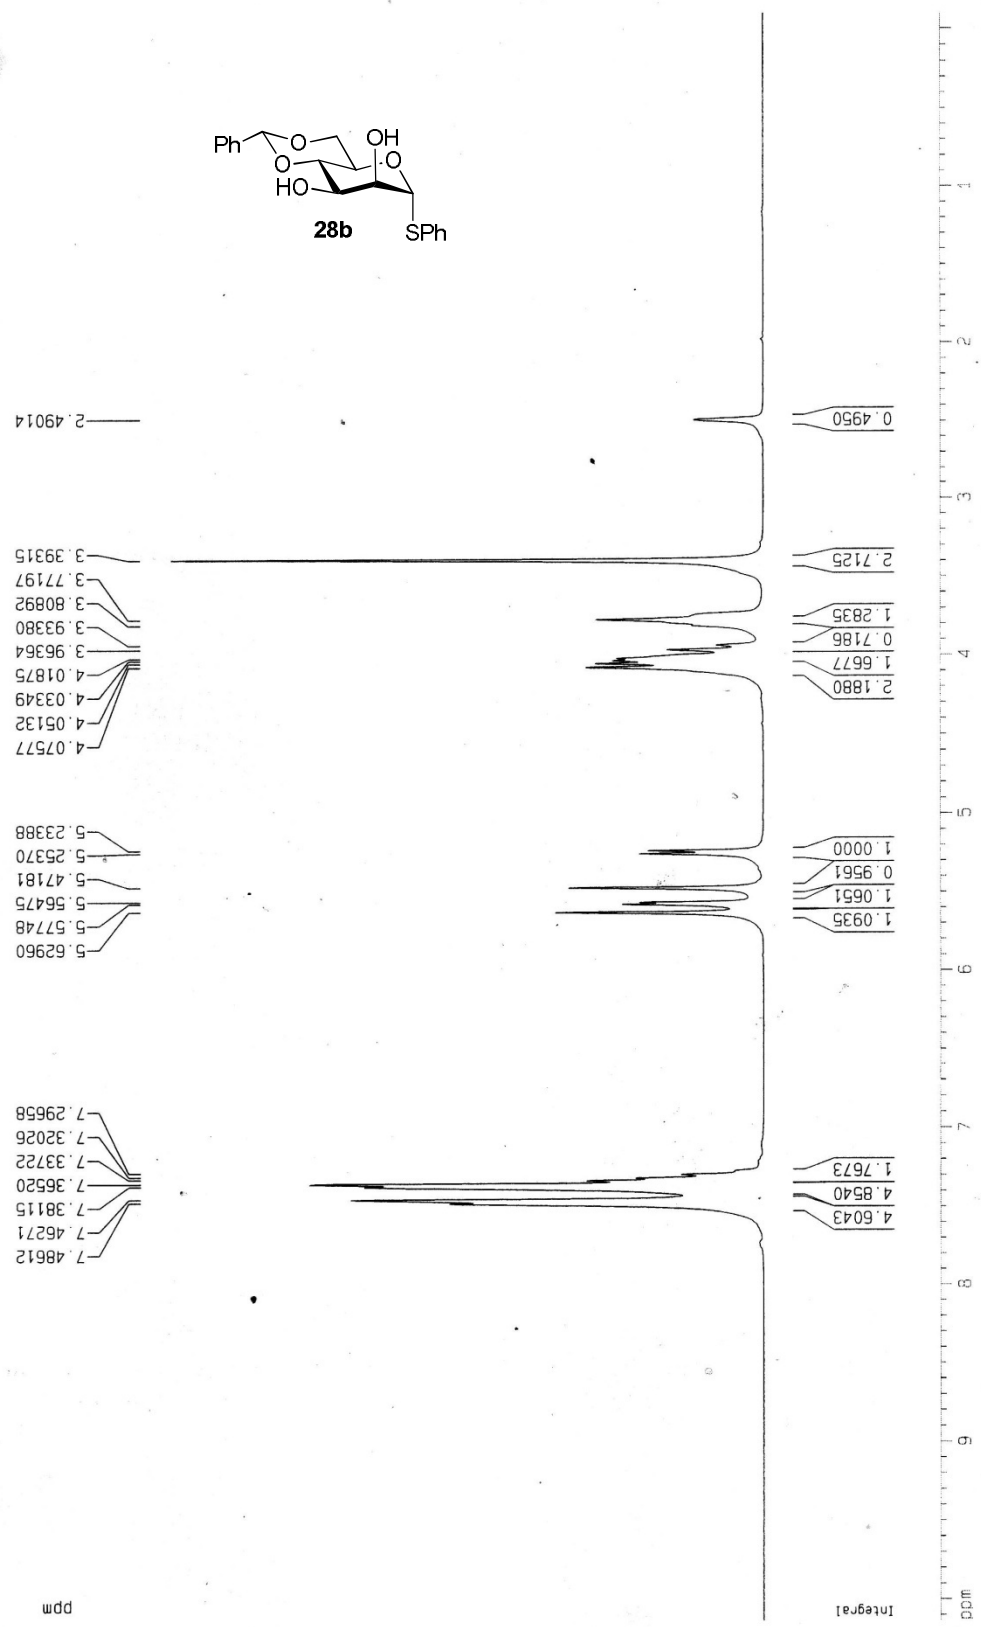

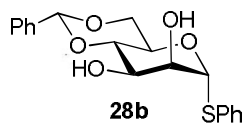

40.799  
40.524  
40.245  
39.967  
39.689  
39.411  
39.133

78.955  
72.899  
68.560  
68.087  
65.771

89.743

101.684

138.306  
134.144  
131.773  
129.744  
129.345  
128.502  
127.933  
126.882

ppm

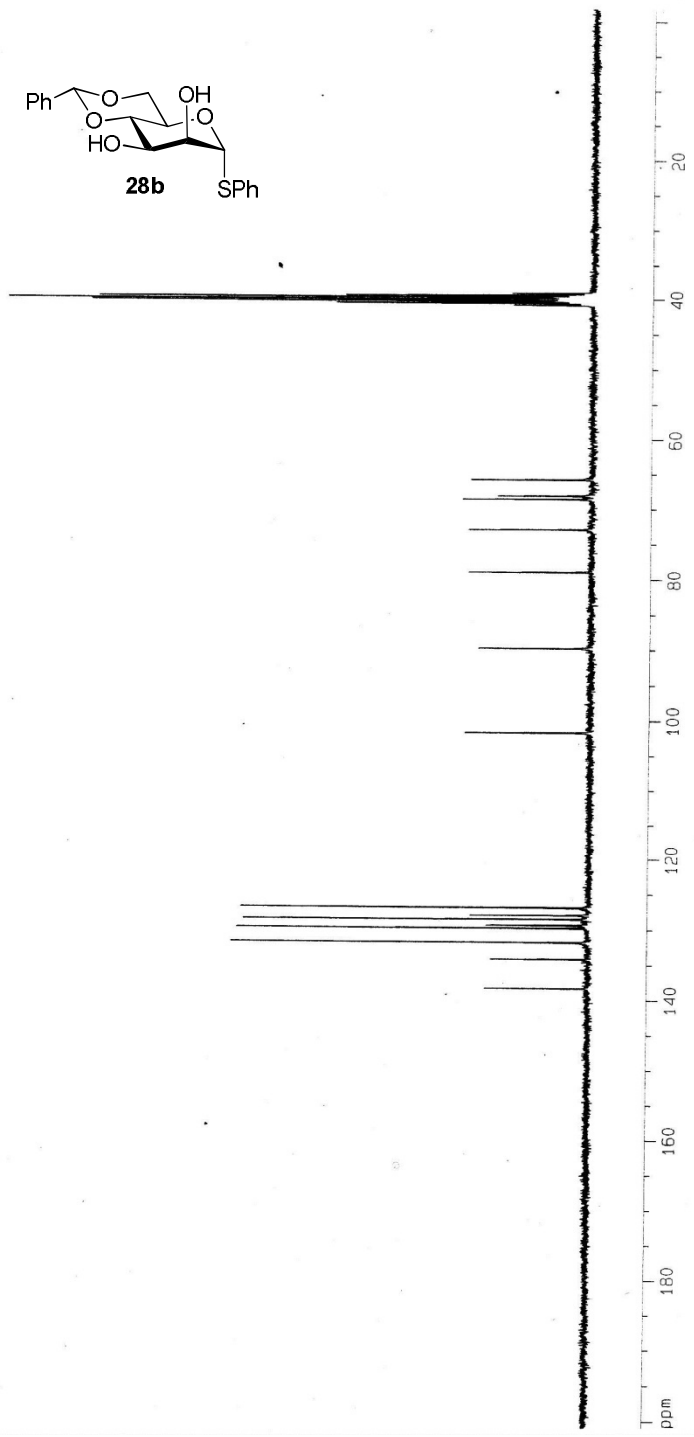

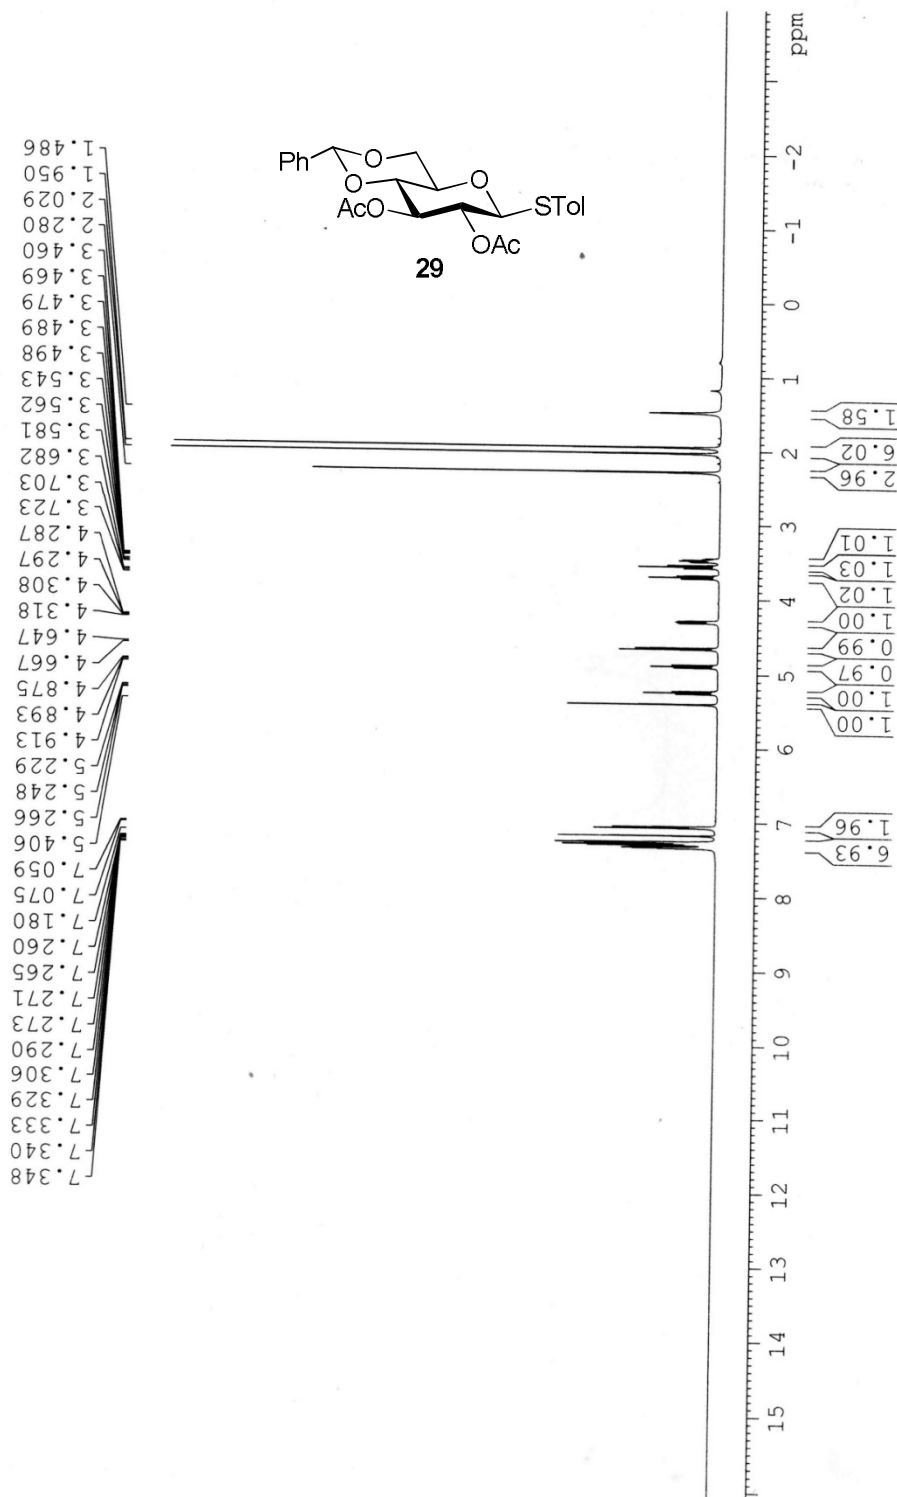

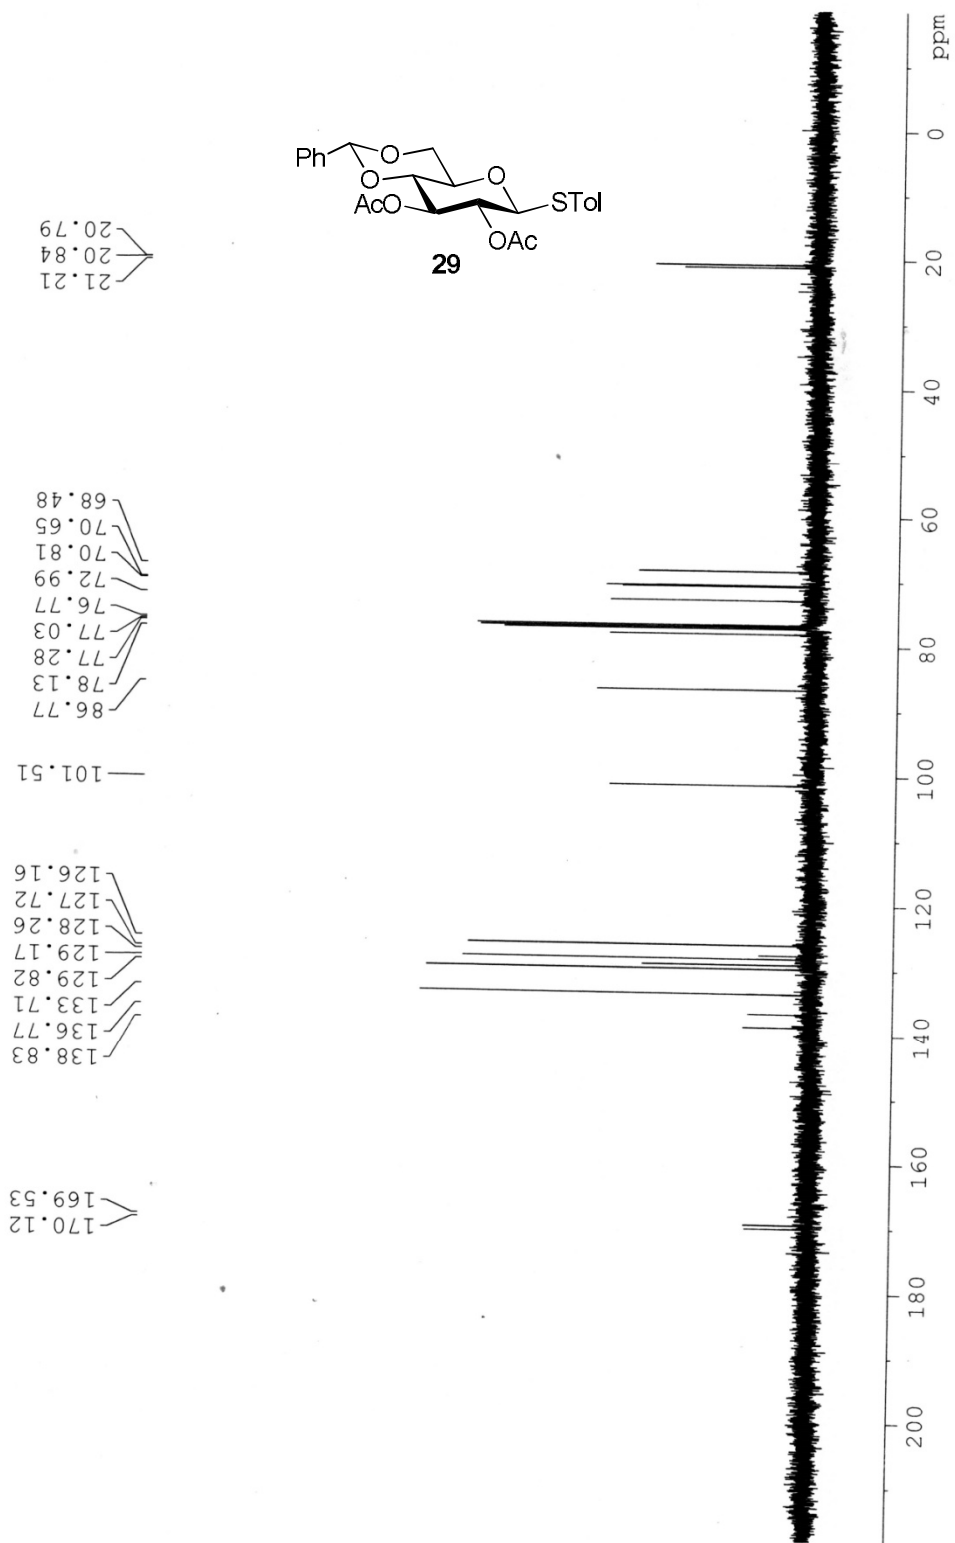

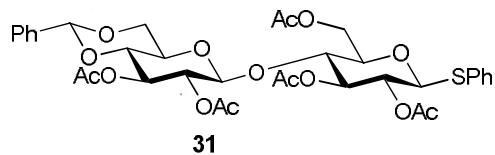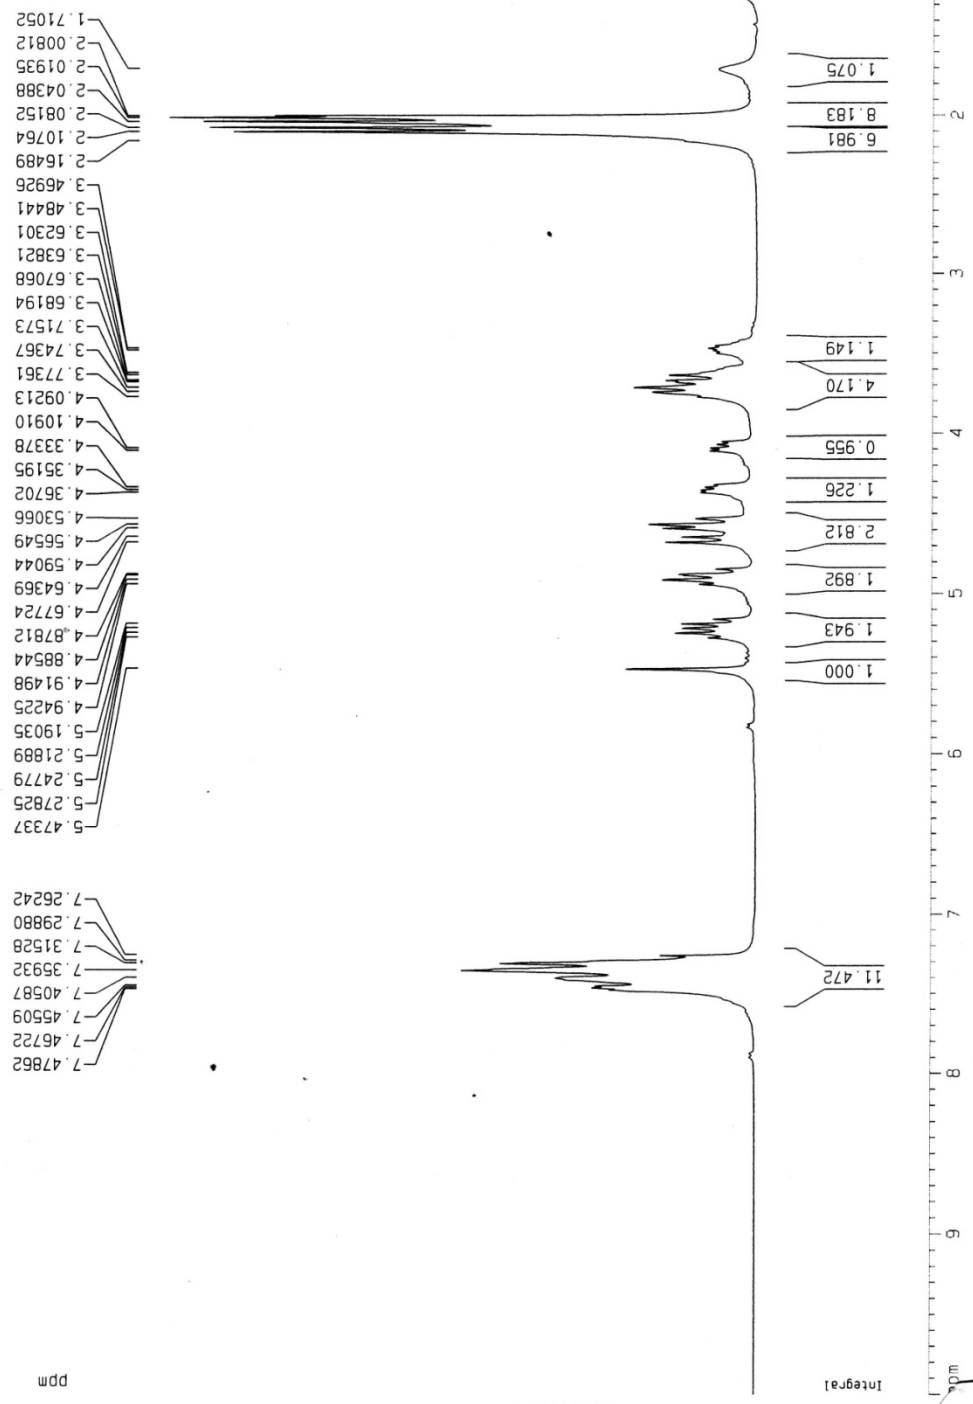

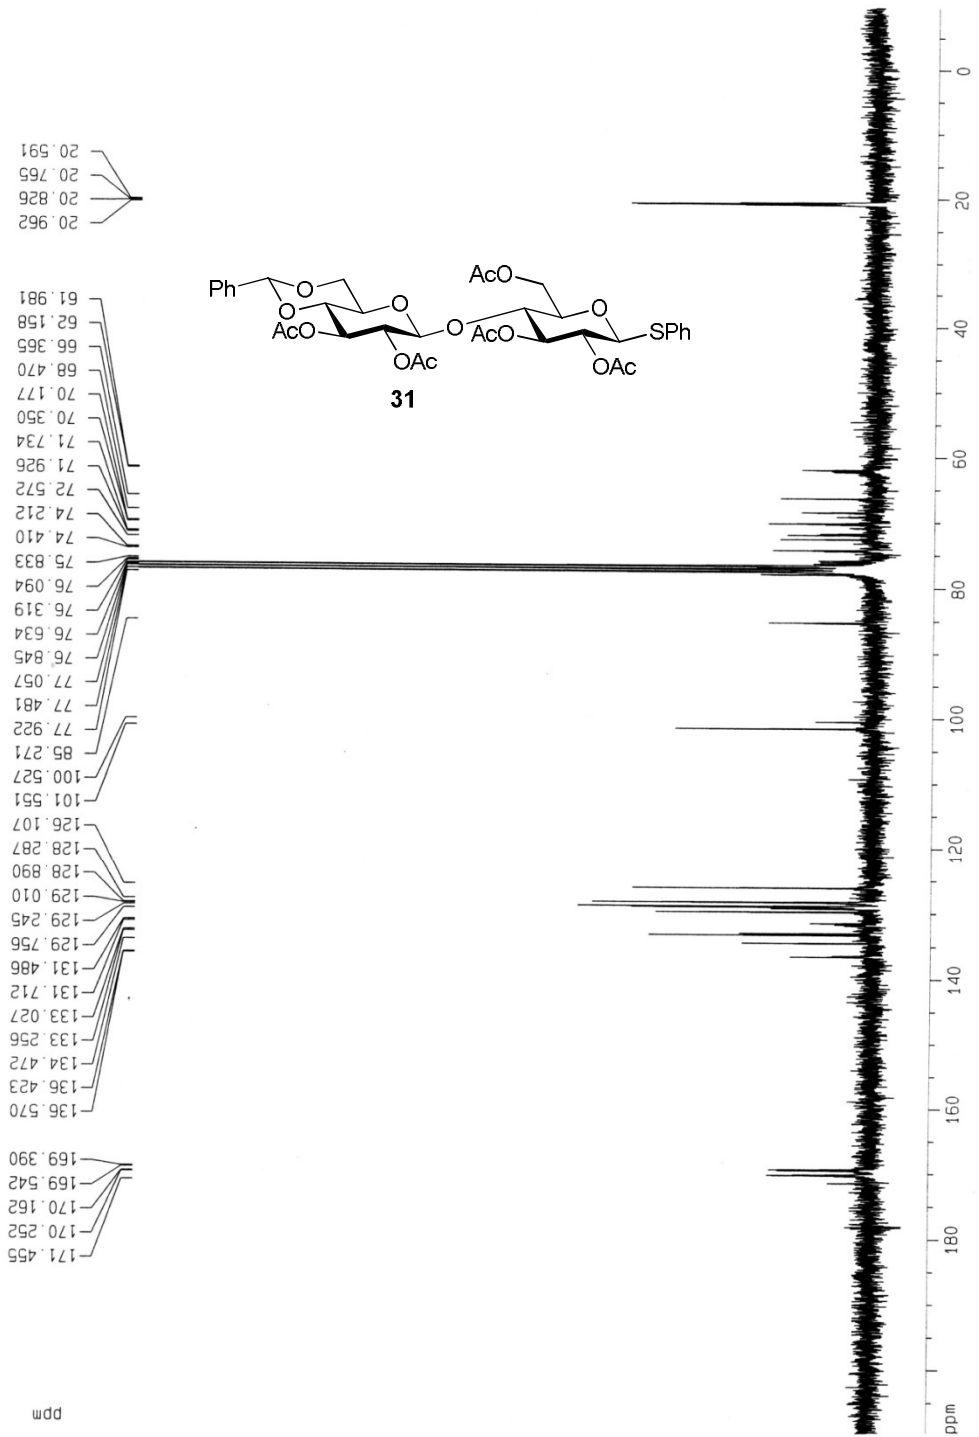

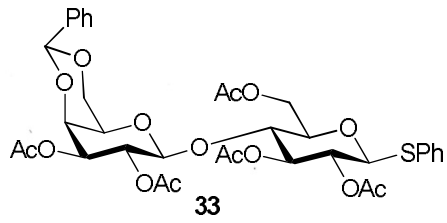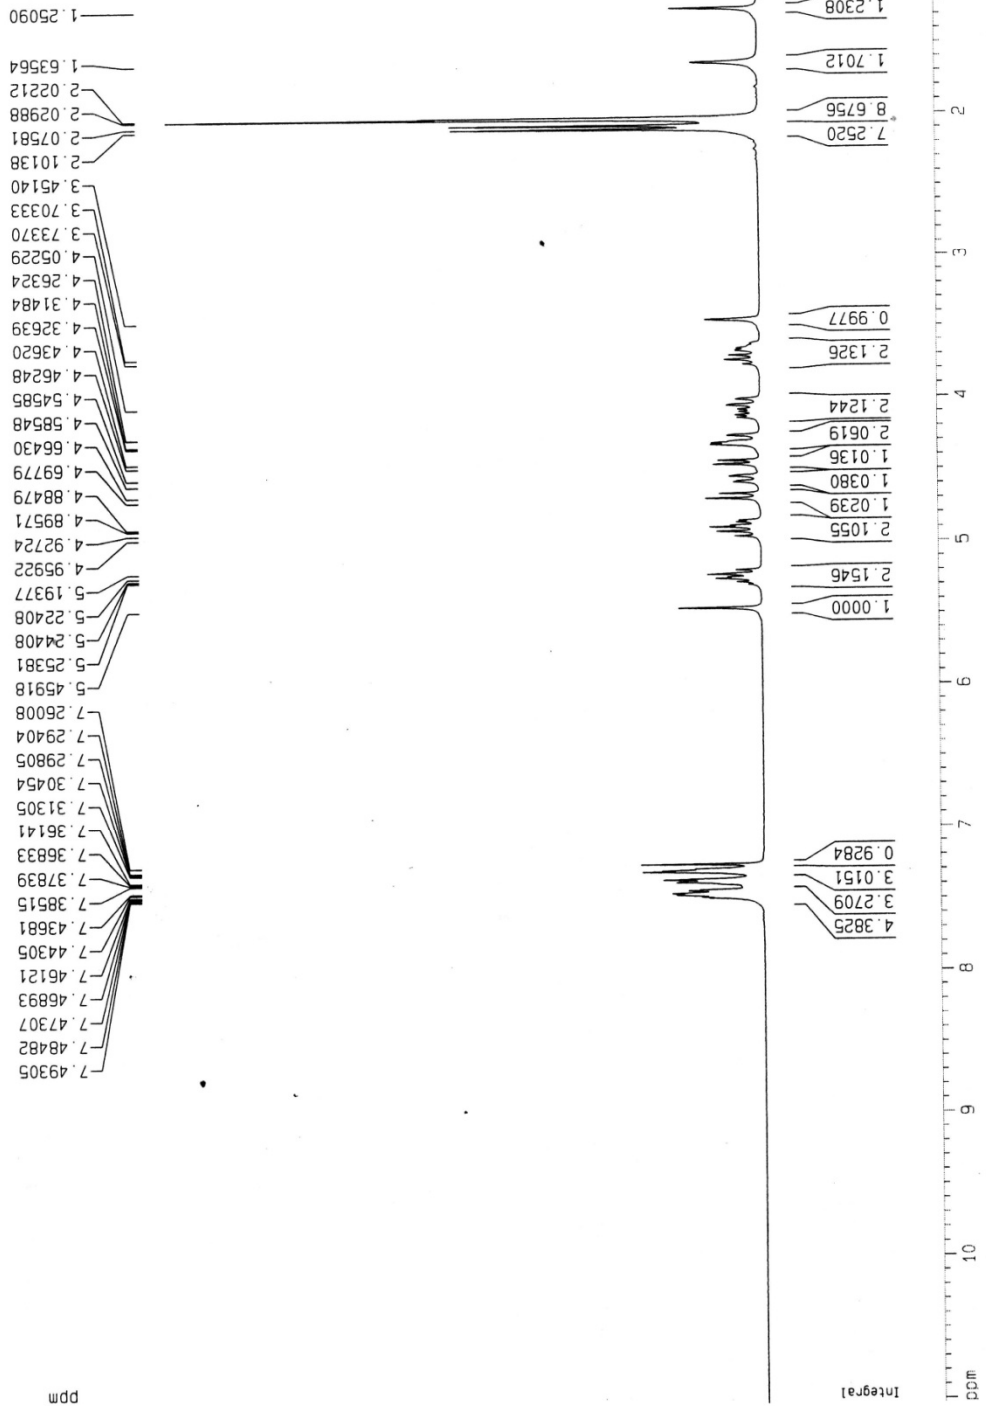

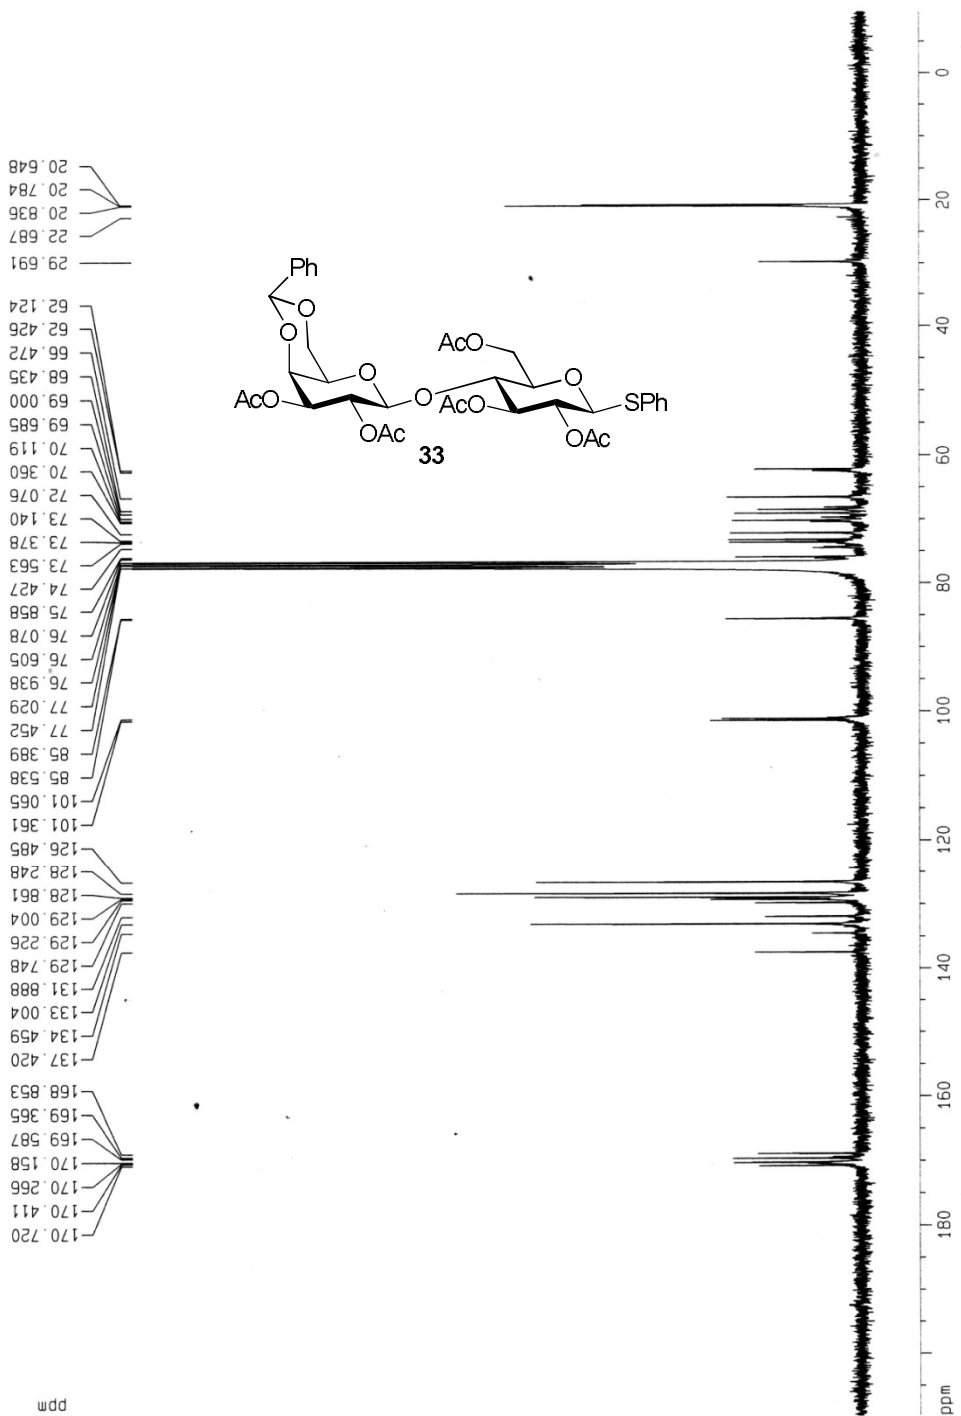



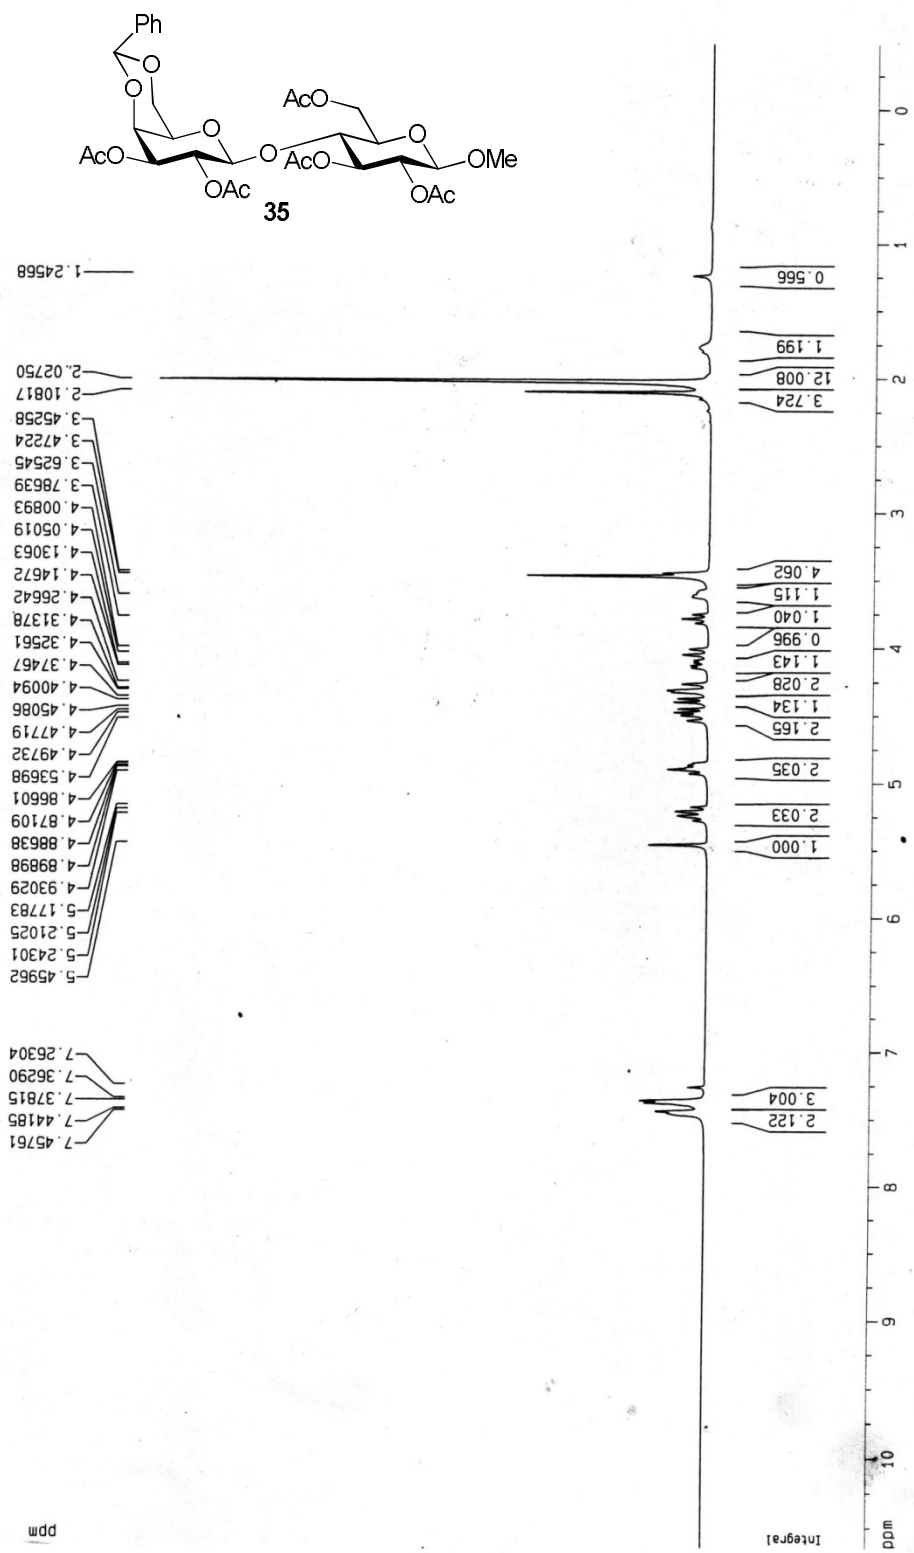

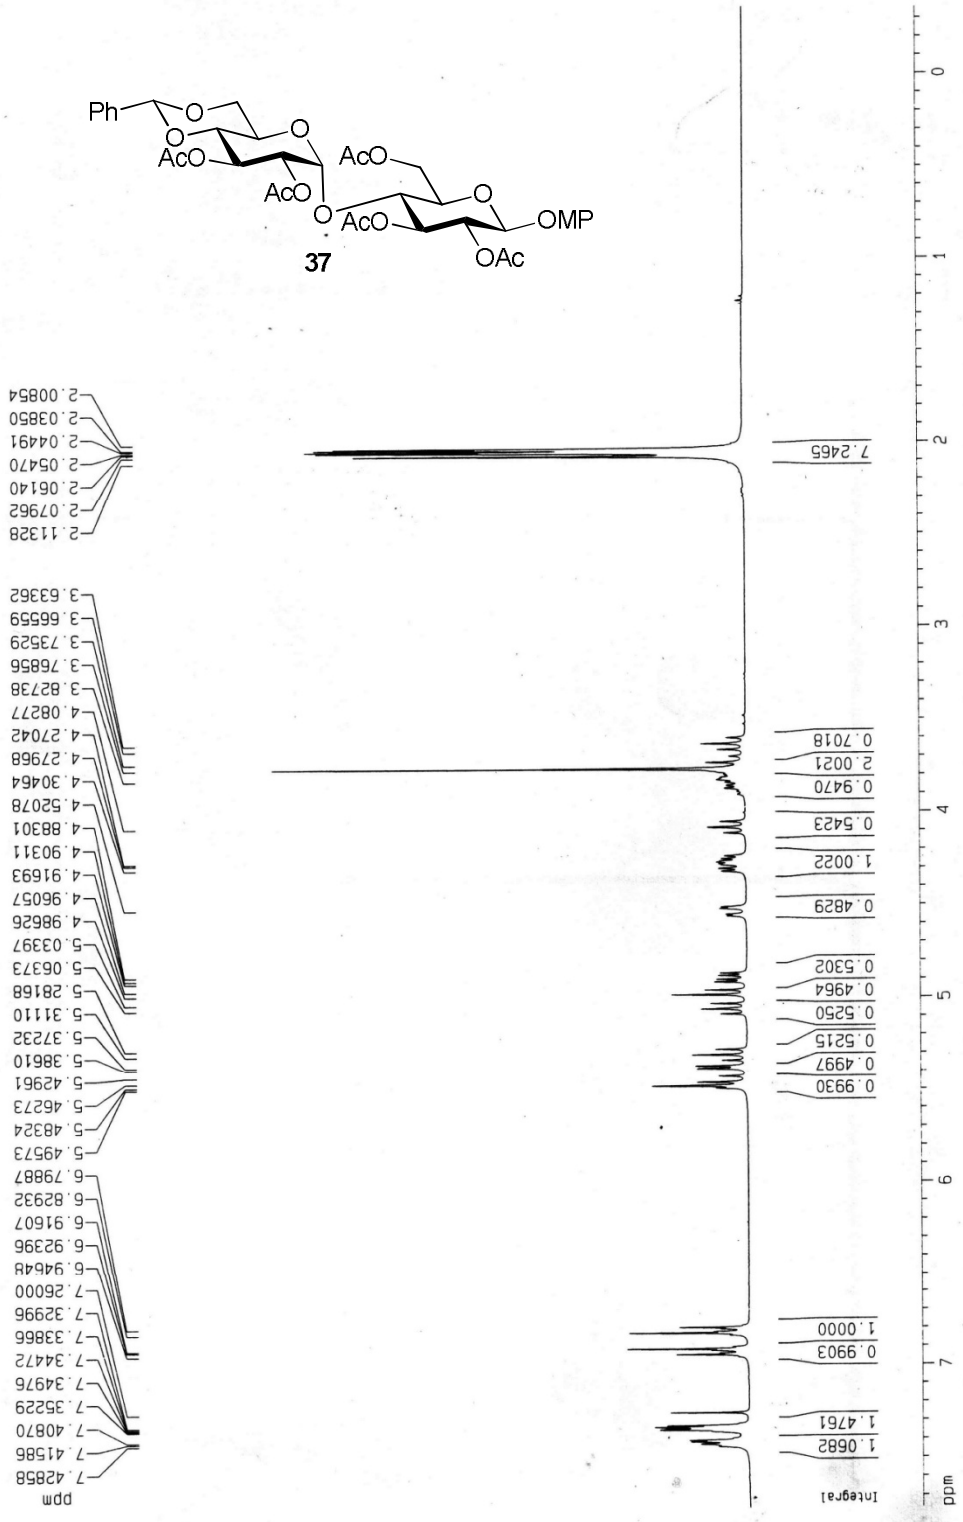

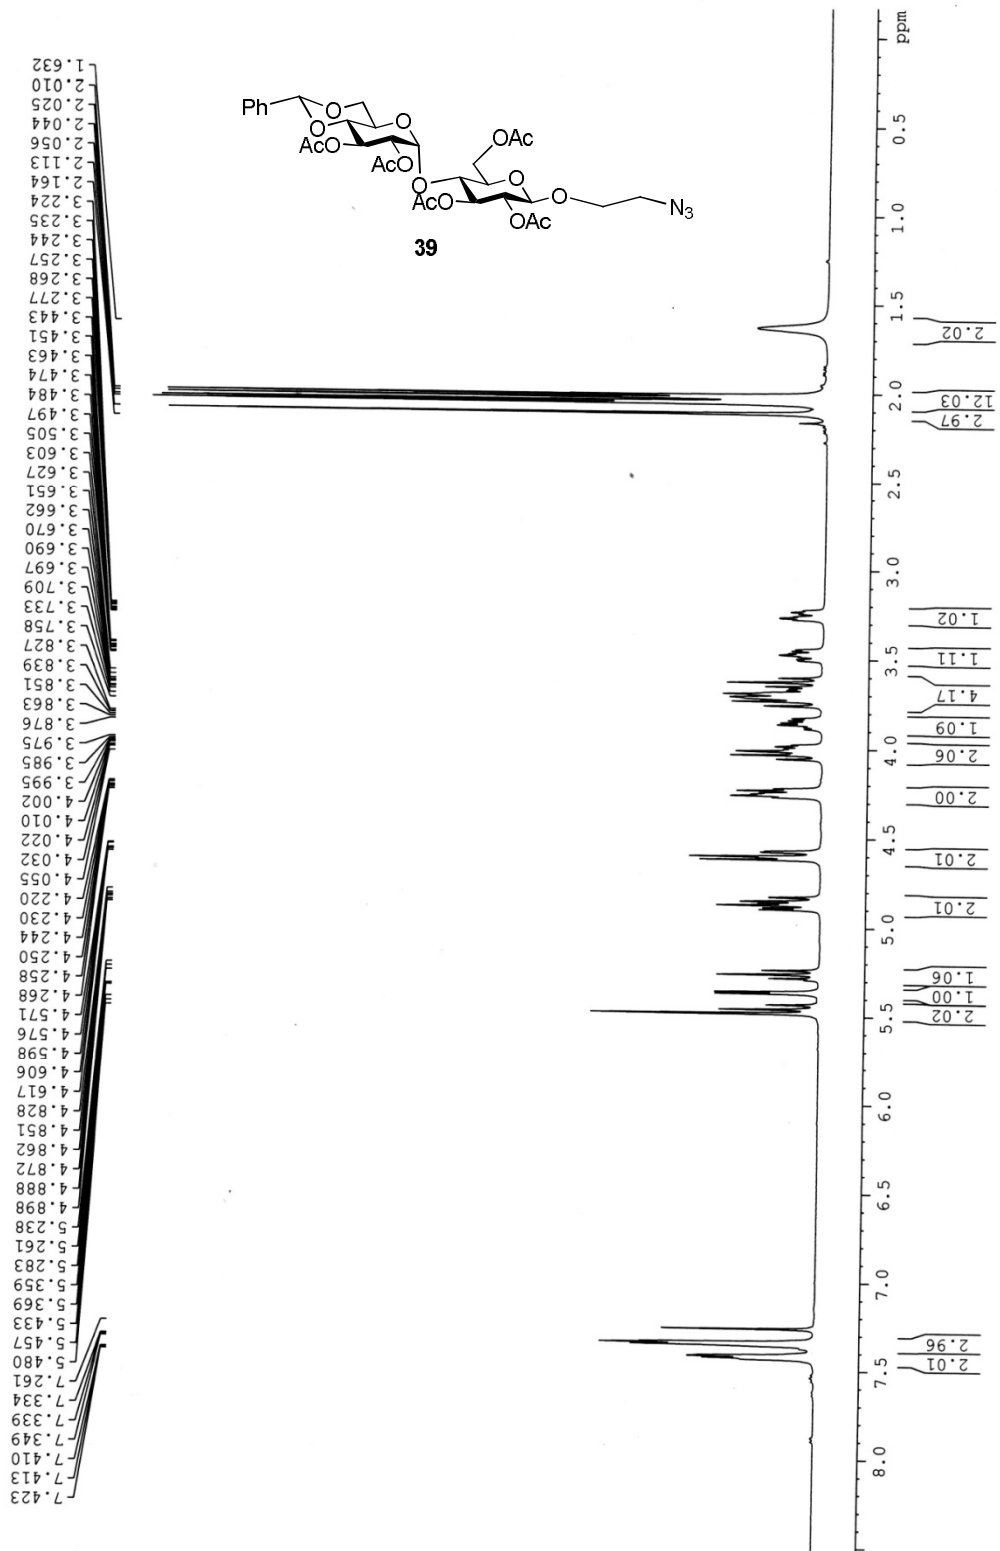

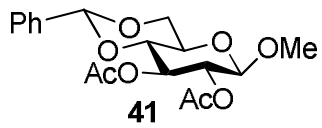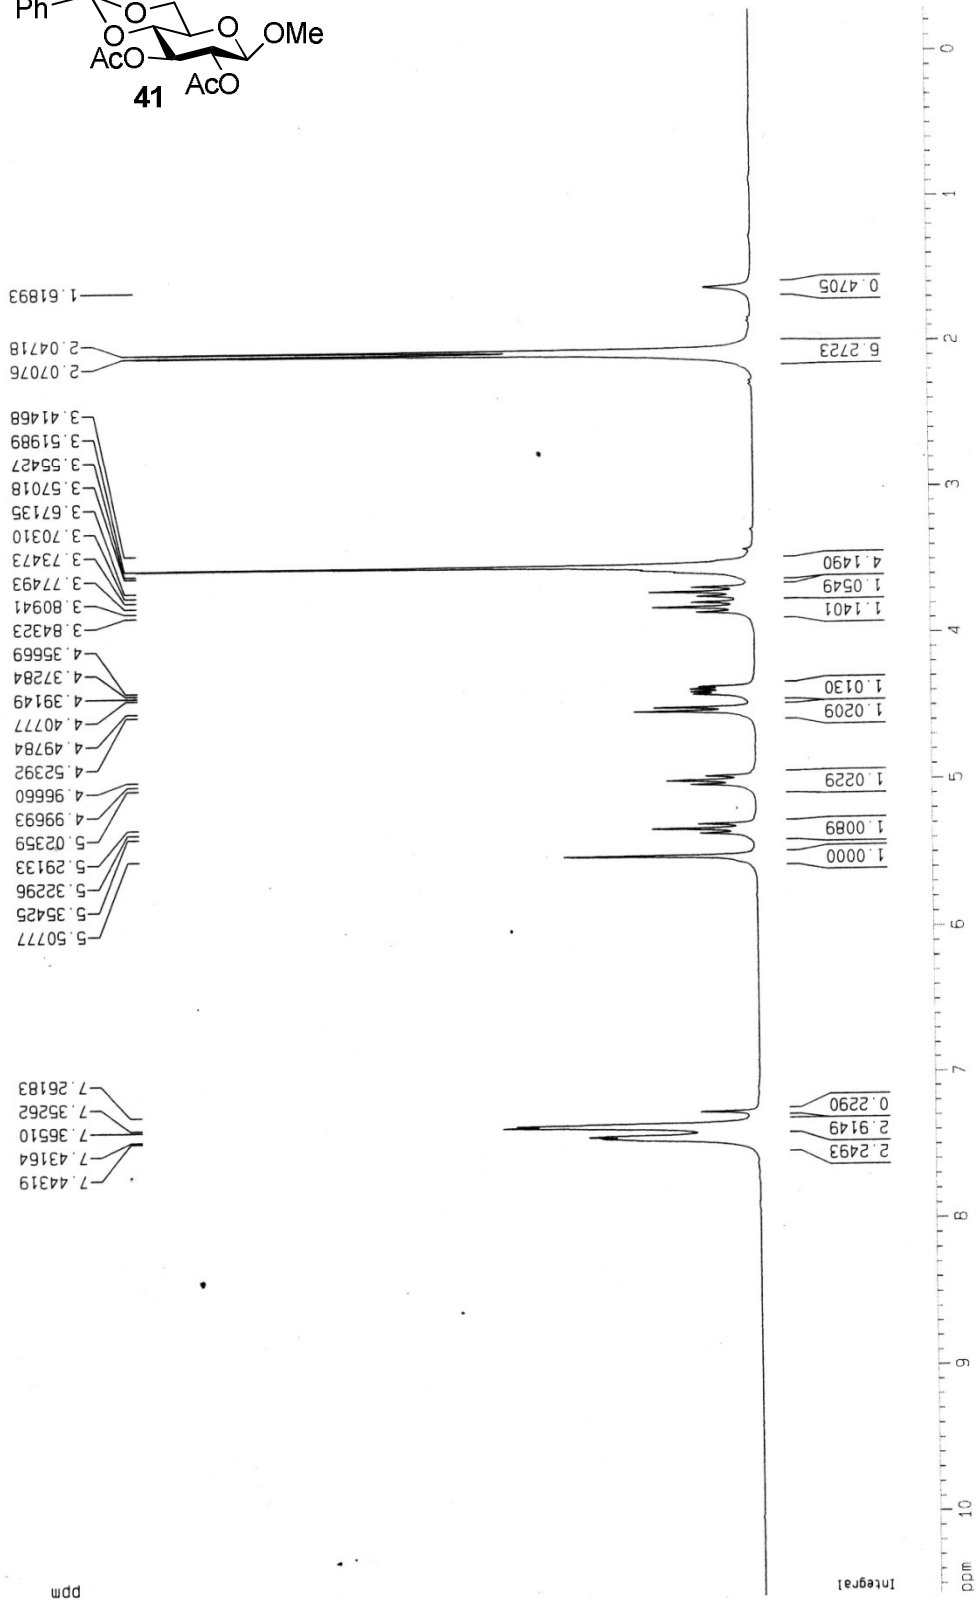

Supplement: c6ra23198e1.pdf [file c6ra23198e1.pdf]
